# Supplementary material for: Cell Surface Notch Ligand DLL3 is a Therapeutic Target in Isocitrate Dehydrogenase–mutant Glioma
Source: Oxford University Press journal article supplement (doi:10.1158/1078-0432.ccr-18-2312), 2018-11-05
Supplement: 10780432ccr182312-sup-205530_1_supp_5118391_ph3z9j.xlsx [file 10780432ccr182312-sup-205530_1_supp_5118391_ph3z9j.xlsx]

## Sheet: Table S1-DLL3 RNA TCGA
Study of origin	track_name	Cancer Type Detailed	Histologic Grade	IDH1	IDH2	TP53	DLL3 RNA-Seq	G-CIMP METHYLATION	MGMT Status	Gene Expression Subtype
Brain Lower Grade Glioma (TCGA, Provisional)	TCGA-P5-A5EX	Anaplastic Oligoastrocytoma	G3	Missense Mutation			7.6299
Brain Lower Grade Glioma (TCGA, Provisional)	TCGA-HT-8563	Anaplastic Astrocytoma	G3	Missense Mutation		Missense Mutation (putative driver)	11.8524
Brain Lower Grade Glioma (TCGA, Provisional)	TCGA-DU-7007	Astrocytoma	G2	Missense Mutation		Truncating mutation (putative driver)	264.94
Brain Lower Grade Glioma (TCGA, Provisional)	TCGA-HT-7607	Astrocytoma	G2	Missense Mutation			534.343
Brain Lower Grade Glioma (TCGA, Provisional)	TCGA-HT-7616	Anaplastic Oligoastrocytoma	G3	Missense Mutation			601.362
Brain Lower Grade Glioma (TCGA, Provisional)	TCGA-DU-6394	Anaplastic Oligoastrocytoma	G3	Missense Mutation			690.849
Brain Lower Grade Glioma (TCGA, Provisional)	TCGA-HT-8109	Anaplastic Oligoastrocytoma	G3	Missense Mutation			724.947
Brain Lower Grade Glioma (TCGA, Provisional)	TCGA-HT-7684	Oligoastrocytoma	G3	Missense Mutation			750.948
Brain Lower Grade Glioma (TCGA, Provisional)	TCGA-HT-7902	Oligoastrocytoma	G2	Missense Mutation		Missense Mutation (putative driver)	790.271
Brain Lower Grade Glioma (TCGA, Provisional)	TCGA-HT-7481	Oligodendroglioma	G2	Missense Mutation			805.686
Brain Lower Grade Glioma (TCGA, Provisional)	TCGA-HT-8106	Anaplastic Astrocytoma	G3	Missense Mutation		Truncating mutation (putative driver)	820.86
Brain Lower Grade Glioma (TCGA, Provisional)	TCGA-FG-A60J	Oligoastrocytoma	G2	Missense Mutation		Truncating mutation (putative driver)	827.457
Brain Lower Grade Glioma (TCGA, Provisional)	TCGA-HT-7881	Oligodendroglioma	G2	Missense Mutation			833.051
Brain Lower Grade Glioma (TCGA, Provisional)	TCGA-HT-8105	Anaplastic Oligoastrocytoma	G3	Missense Mutation		Missense Mutation (putative driver)	843.073
Glioblastoma (TCGA, Cell 2013)	TCGA-06-5417	Glioblastoma Multiforme	G4	Missense Mutation		Truncating mutation (putative driver)	862	G-CIMP	METHYLATED	G-CIMP
Brain Lower Grade Glioma (TCGA, Provisional)	TCGA-DB-5279	Oligodendroglioma	G2	Missense Mutation			869.483
Brain Lower Grade Glioma (TCGA, Provisional)	TCGA-DU-A5TP	Anaplastic Astrocytoma	G3	Missense Mutation		Missense Mutation (putative driver)	942.529
Brain Lower Grade Glioma (TCGA, Provisional)	TCGA-HT-7620	Anaplastic Oligoastrocytoma	G3	Missense Mutation			958.904
Brain Lower Grade Glioma (TCGA, Provisional)	TCGA-HT-7474	Oligoastrocytoma	G2	Missense Mutation		Missense Mutation (putative driver)	1003.29
Brain Lower Grade Glioma (TCGA, Provisional)	TCGA-HT-7874	Anaplastic Oligoastrocytoma	G3	Missense Mutation			1023.12
Brain Lower Grade Glioma (TCGA, Provisional)	TCGA-HT-7606	Astrocytoma	G2	Missense Mutation		Missense Mutation (putative driver)	1035.49
Brain Lower Grade Glioma (TCGA, Provisional)	TCGA-P5-A5F2	Astrocytoma	G2	Missense Mutation		Missense Mutation (putative driver)	1038.03
Brain Lower Grade Glioma (TCGA, Provisional)	TCGA-CS-6665	Anaplastic Astrocytoma	G3	Missense Mutation		Truncating mutation (putative driver)	1064.9
Brain Lower Grade Glioma (TCGA, Provisional)	TCGA-HT-7694	Anaplastic Oligoastrocytoma	G3	Missense Mutation			1080.74
Brain Lower Grade Glioma (TCGA, Provisional)	TCGA-HT-A61A	Oligodendroglioma	G2	Missense Mutation			1080.76
Brain Lower Grade Glioma (TCGA, Provisional)	TCGA-HT-7605	Oligodendroglioma	G2	Missense Mutation			1170.34
Brain Lower Grade Glioma (TCGA, Provisional)	TCGA-FG-8187	Oligoastrocytoma	G2	Missense Mutation			1336.27
Brain Lower Grade Glioma (TCGA, Provisional)	TCGA-HT-7473	Oligoastrocytoma	G2	Missense Mutation		Missense Mutation (putative driver)	1512.96
Brain Lower Grade Glioma (TCGA, Provisional)	TCGA-HT-8018	Oligoastrocytoma	G2	Missense Mutation		Truncating mutation (putative driver)	1640.05
Brain Lower Grade Glioma (TCGA, Provisional)	TCGA-DH-5142	Anaplastic Astrocytoma	G3	Missense Mutation		Missense Mutation (putative driver)	1683.85
Brain Lower Grade Glioma (TCGA, Provisional)	TCGA-FG-7641	Oligodendroglioma	G2	Missense Mutation			1731.55
Brain Lower Grade Glioma (TCGA, Provisional)	TCGA-CS-5396	Anaplastic Oligoastrocytoma	G3	Missense Mutation		Missense Mutation (putative driver)	1754.12
Brain Lower Grade Glioma (TCGA, Provisional)	TCGA-HT-A5R7	Anaplastic Astrocytoma	G3	Missense Mutation			1844.17
Brain Lower Grade Glioma (TCGA, Provisional)	TCGA-DU-7010	Anaplastic Astrocytoma	G3	Missense Mutation		Missense Mutation (putative driver)	1848.1
Brain Lower Grade Glioma (TCGA, Provisional)	TCGA-DB-A4XH	Oligoastrocytoma	G2	Missense Mutation			1869.46
Brain Lower Grade Glioma (TCGA, Provisional)	TCGA-HW-7490	Astrocytoma	G2	Missense Mutation		Missense Mutation (putative driver)	1874.09
Brain Lower Grade Glioma (TCGA, Provisional)	TCGA-HT-8010	Oligodendroglioma	G2	Missense Mutation			1889.05
Brain Lower Grade Glioma (TCGA, Provisional)	TCGA-FN-7833	Oligoastrocytoma	G3	Missense Mutation		Truncating mutation (putative driver)	1894.29
Brain Lower Grade Glioma (TCGA, Provisional)	TCGA-HT-7686	Anaplastic Astrocytoma	G3	Missense Mutation		Missense Mutation (putative driver)	1906.4
Brain Lower Grade Glioma (TCGA, Provisional)	TCGA-HT-7608	Oligoastrocytoma	G2	Missense Mutation			1925.47
Brain Lower Grade Glioma (TCGA, Provisional)	TCGA-HW-7486	Oligodendroglioma	G2	Missense Mutation			1925.73
Brain Lower Grade Glioma (TCGA, Provisional)	TCGA-E1-5305	Anaplastic Astrocytoma	G3	Missense Mutation		Missense Mutation (putative driver)	1930.01
Brain Lower Grade Glioma (TCGA, Provisional)	TCGA-HT-A618	Anaplastic Astrocytoma	G3	Missense Mutation		Missense Mutation (putative driver)	1939.31
Brain Lower Grade Glioma (TCGA, Provisional)	TCGA-FG-5962	Anaplastic Oligoastrocytoma	G3	Missense Mutation			1972.7
Brain Lower Grade Glioma (TCGA, Provisional)	TCGA-HT-7693	Oligodendroglioma	G2	Missense Mutation		Missense Mutation (putative driver)	1988.2
Brain Lower Grade Glioma (TCGA, Provisional)	TCGA-DU-5851	Oligoastrocytoma	G3	Missense Mutation		Missense Mutation (putative driver)	2023.62
Brain Lower Grade Glioma (TCGA, Provisional)	TCGA-HT-7603	Oligodendroglioma	G2	Missense Mutation		Missense Mutation (putative driver)	2062.5
Brain Lower Grade Glioma (TCGA, Provisional)	TCGA-HT-A61B	Anaplastic Astrocytoma	G3	Missense Mutation		Missense Mutation (putative driver)	2089.7
Brain Lower Grade Glioma (TCGA, Provisional)	TCGA-HT-7611	Oligoastrocytoma	G2	Missense Mutation		Missense Mutation (putative driver)	2115.57
Brain Lower Grade Glioma (TCGA, Provisional)	TCGA-HW-7487	Oligodendroglioma	G2	Missense Mutation			2142.7
Brain Lower Grade Glioma (TCGA, Provisional)	TCGA-HT-7688	Anaplastic Oligoastrocytoma	G3	Missense Mutation		Missense Mutation (putative driver)	2167.09
Brain Lower Grade Glioma (TCGA, Provisional)	TCGA-FG-8186	Oligoastrocytoma	G3	Missense Mutation			2260.96
Brain Lower Grade Glioma (TCGA, Provisional)	TCGA-DU-7304	Oligoastrocytoma	G3	Missense Mutation		Truncating mutation (putative driver)	2336.27
Brain Lower Grade Glioma (TCGA, Provisional)	TCGA-DU-A5TS	Oligodendroglioma	G2	Missense Mutation			2402.11
Brain Lower Grade Glioma (TCGA, Provisional)	TCGA-DB-5276	Oligoastrocytoma	G3	Missense Mutation			2408.14
Brain Lower Grade Glioma (TCGA, Provisional)	TCGA-HT-7602	Oligodendroglioma	G2	Missense Mutation		Truncating mutation (putative driver)	2501.02
Brain Lower Grade Glioma (TCGA, Provisional)	TCGA-DU-5874	Oligodendroglioma	G2	Missense Mutation			2516.74
Brain Lower Grade Glioma (TCGA, Provisional)	TCGA-HT-7475	Oligoastrocytoma	G3	Missense Mutation		Missense Mutation (putative driver)	2580.29
Brain Lower Grade Glioma (TCGA, Provisional)	TCGA-DB-A64P	Anaplastic Oligoastrocytoma	G3	Missense Mutation			2610.36
Brain Lower Grade Glioma (TCGA, Provisional)	TCGA-E1-5304	Anaplastic Astrocytoma	G3	Missense Mutation		Missense Mutation (putative driver)	2638.16
Brain Lower Grade Glioma (TCGA, Provisional)	TCGA-FG-8188	Oligoastrocytoma	G2	Missense Mutation		Missense Mutation (putative driver)	2640.77
Brain Lower Grade Glioma (TCGA, Provisional)	TCGA-P5-A5F1	Astrocytoma	G2	Missense Mutation		Truncating mutation (putative driver)	2664.19
Brain Lower Grade Glioma (TCGA, Provisional)	TCGA-DB-5277	Anaplastic Astrocytoma	G3	Missense Mutation		Missense Mutation (putative driver)	2726.92
Brain Lower Grade Glioma (TCGA, Provisional)	TCGA-HW-7495	Oligodendroglioma	G2	Missense Mutation			2758.63
Brain Lower Grade Glioma (TCGA, Provisional)	TCGA-HT-7467	Oligodendroglioma	G2	Missense Mutation			2790.78
Brain Lower Grade Glioma (TCGA, Provisional)	TCGA-HT-A615	Oligodendroglioma	G2	Missense Mutation			2820.11
Brain Lower Grade Glioma (TCGA, Provisional)	TCGA-HT-7877	Oligodendroglioma	G2	Missense Mutation			2838.25
Brain Lower Grade Glioma (TCGA, Provisional)	TCGA-DU-7009	Oligodendroglioma	G2	Missense Mutation			2841.65
Brain Lower Grade Glioma (TCGA, Provisional)	TCGA-HT-7692	Oligoastrocytoma	G2	Missense Mutation			2843.23
Brain Lower Grade Glioma (TCGA, Provisional)	TCGA-FG-8191	Anaplastic Oligoastrocytoma	G3	Missense Mutation		Missense Mutation (putative driver)	2934.57
Brain Lower Grade Glioma (TCGA, Provisional)	TCGA-DH-A66B	Anaplastic Astrocytoma	G3	Missense Mutation		Truncating mutation (putative driver)	2937.23
Brain Lower Grade Glioma (TCGA, Provisional)	TCGA-DU-7301	Oligodendroglioma	G2	Missense Mutation		Missense Mutation (putative driver)	2993.41
Brain Lower Grade Glioma (TCGA, Provisional)	TCGA-HT-7695	Oligodendroglioma	G2	Missense Mutation			3029.08
Brain Lower Grade Glioma (TCGA, Provisional)	TCGA-HW-8319	Anaplastic Astrocytoma	G3	Missense Mutation		Truncating mutation (putative driver)	3083.89
Brain Lower Grade Glioma (TCGA, Provisional)	TCGA-CS-5394	Anaplastic Astrocytoma	G3	Missense Mutation			3189.36
Brain Lower Grade Glioma (TCGA, Provisional)	TCGA-DH-A66F	Oligodendroglioma	G2	Missense Mutation			3243.26
Brain Lower Grade Glioma (TCGA, Provisional)	TCGA-HT-7470	Anaplastic Oligoastrocytoma	G3	Missense Mutation		Missense Mutation (putative driver)	3247.85
Brain Lower Grade Glioma (TCGA, Provisional)	TCGA-DU-6410	Anaplastic Oligoastrocytoma	G3	Missense Mutation			3254.57
Brain Lower Grade Glioma (TCGA, Provisional)	TCGA-HT-7880	Oligoastrocytoma	G2	Missense Mutation		Missense Mutation (putative driver)	3325.19
Glioblastoma (TCGA, Cell 2013)	TCGA-19-2629	Glioblastoma Multiforme	G4	Missense Mutation		Truncating mutation (putative driver)	3364	G-CIMP	UNMETHYLATED	G-CIMP
Brain Lower Grade Glioma (TCGA, Provisional)	TCGA-DU-6408	Anaplastic Oligoastrocytoma	G3	Missense Mutation		Missense Mutation (putative driver)	3377.11
Brain Lower Grade Glioma (TCGA, Provisional)	TCGA-HW-A5KJ	Anaplastic Oligoastrocytoma	G3	Missense Mutation			3377.92
Brain Lower Grade Glioma (TCGA, Provisional)	TCGA-CS-4944	Astrocytoma	G2	Missense Mutation			3383.18
Brain Lower Grade Glioma (TCGA, Provisional)	TCGA-HT-A5R5	Oligodendroglioma	G2	Missense Mutation		Missense Mutation (putative driver)	3388.4
Brain Lower Grade Glioma (TCGA, Provisional)	TCGA-DB-A64V	Oligodendroglioma	G2	Missense Mutation			3604.19
Brain Lower Grade Glioma (TCGA, Provisional)	TCGA-HW-7489	Oligoastrocytoma	G2	Missense Mutation		Missense Mutation (putative driver)	3627.11
Brain Lower Grade Glioma (TCGA, Provisional)	TCGA-HT-7477	Anaplastic Astrocytoma	G3	Missense Mutation		Missense Mutation (putative driver)	3628.47
Brain Lower Grade Glioma (TCGA, Provisional)	TCGA-HT-7485	Astrocytoma	G2	Missense Mutation		Missense Mutation (putative driver)	3643.9
Brain Lower Grade Glioma (TCGA, Provisional)	TCGA-CS-6290	Anaplastic Astrocytoma	G3	Missense Mutation		Missense Mutation (putative driver)	3702.9
Brain Lower Grade Glioma (TCGA, Provisional)	TCGA-DU-7019	Oligoastrocytoma		Missense Mutation		Missense Mutation (putative driver)	3777.43
Brain Lower Grade Glioma (TCGA, Provisional)	TCGA-DB-A64L	Oligodendroglioma	G2	Missense Mutation			3780.74
Brain Lower Grade Glioma (TCGA, Provisional)	TCGA-HT-7478	Astrocytoma	G2	Missense Mutation		Missense Mutation (putative driver)	3785.3
Brain Lower Grade Glioma (TCGA, Provisional)	TCGA-HT-7873	Oligoastrocytoma	G2	Missense Mutation		Truncating mutation (putative driver)	3854.78
Brain Lower Grade Glioma (TCGA, Provisional)	TCGA-E1-5303	Anaplastic Astrocytoma	G3	Missense Mutation		Missense Mutation (putative driver)	3858.27
Brain Lower Grade Glioma (TCGA, Provisional)	TCGA-IK-7675	Oligodendroglioma	G2	Missense Mutation		Missense Mutation (putative driver)	3913.64
Brain Lower Grade Glioma (TCGA, Provisional)	TCGA-FG-A4MT	Oligodendroglioma	G2	Missense Mutation		Missense Mutation (putative driver)	4006.55
Brain Lower Grade Glioma (TCGA, Provisional)	TCGA-FG-6689	Astrocytoma	G2	Missense Mutation		Truncating mutation (putative driver)	4167.43
Brain Lower Grade Glioma (TCGA, Provisional)	TCGA-DU-7298	Anaplastic Astrocytoma	G3	Missense Mutation		Truncating mutation (putative driver)	4192.43
Brain Lower Grade Glioma (TCGA, Provisional)	TCGA-HT-7479	Anaplastic Astrocytoma	G3	Missense Mutation		Missense Mutation (putative driver)	4209.17
Brain Lower Grade Glioma (TCGA, Provisional)	TCGA-DU-7302	Anaplastic Oligoastrocytoma	G3	Missense Mutation			4212.34
Brain Lower Grade Glioma (TCGA, Provisional)	TCGA-HT-7471	Anaplastic Oligoastrocytoma	G3	Missense Mutation			4245.34
Brain Lower Grade Glioma (TCGA, Provisional)	TCGA-CS-4938	Astrocytoma		Missense Mutation		Missense Mutation (putative driver)	4254.67
Brain Lower Grade Glioma (TCGA, Provisional)	TCGA-CS-5390	Oligodendroglioma	G2	Missense Mutation			4275.67
Brain Lower Grade Glioma (TCGA, Provisional)	TCGA-DU-5855	Oligoastrocytoma	G3	Missense Mutation		Missense Mutation (putative driver)	4292.64
Brain Lower Grade Glioma (TCGA, Provisional)	TCGA-QH-A65V	Oligodendroglioma	G2	Missense Mutation			4318.12
Brain Lower Grade Glioma (TCGA, Provisional)	TCGA-HT-8114	Oligoastrocytoma	G3	Missense Mutation		Truncating mutation (putative driver)	4333.8
Brain Lower Grade Glioma (TCGA, Provisional)	TCGA-E1-5307	Anaplastic Astrocytoma	G3	Missense Mutation		Missense Mutation (putative driver)	4392.75
Brain Lower Grade Glioma (TCGA, Provisional)	TCGA-DB-5280	Oligoastrocytoma	G2	Missense Mutation		Missense Mutation (putative driver)	4414.07
Brain Lower Grade Glioma (TCGA, Provisional)	TCGA-DU-5853	Oligoastrocytoma	G2	Missense Mutation		Missense Mutation (putative driver)	4414.75
Brain Lower Grade Glioma (TCGA, Provisional)	TCGA-E1-5322	Oligoastrocytoma	G2	Missense Mutation		Missense Mutation (putative driver)	4467.07
Brain Lower Grade Glioma (TCGA, Provisional)	TCGA-IK-8125	Oligoastrocytoma	G3	Missense Mutation			4487.38
Brain Lower Grade Glioma (TCGA, Provisional)	TCGA-DB-A64Q	Oligoastrocytoma	G2	Missense Mutation			4510.65
Brain Lower Grade Glioma (TCGA, Provisional)	TCGA-CS-4943	Anaplastic Astrocytoma	G3	Missense Mutation		Missense Mutation (putative driver)	4641.02
Brain Lower Grade Glioma (TCGA, Provisional)	TCGA-HT-7601	Anaplastic Astrocytoma	G3	Missense Mutation		Missense Mutation (putative driver)	4733.4
Brain Lower Grade Glioma (TCGA, Provisional)	TCGA-HT-7482	Oligoastrocytoma	G2	Missense Mutation		Missense Mutation (putative driver)	4747.91
Brain Lower Grade Glioma (TCGA, Provisional)	TCGA-HT-A4DV	Anaplastic Oligoastrocytoma	G3	Missense Mutation			4780
Brain Lower Grade Glioma (TCGA, Provisional)	TCGA-HT-7875	Oligodendroglioma	G2	Missense Mutation			4899.85
Brain Lower Grade Glioma (TCGA, Provisional)	TCGA-DU-7306	Oligoastrocytoma	G2	Missense Mutation		Missense Mutation (putative driver)	4902.1
Brain Lower Grade Glioma (TCGA, Provisional)	TCGA-QH-A65Z	Oligodendroglioma	G2	Missense Mutation			4914.3
Brain Lower Grade Glioma (TCGA, Provisional)	TCGA-HT-7610	Oligoastrocytoma	G2	Missense Mutation		Missense Mutation (putative driver)	5099.12
Brain Lower Grade Glioma (TCGA, Provisional)	TCGA-DU-7299	Anaplastic Astrocytoma	G3	Missense Mutation		Missense Mutation (putative driver)	5166.27
Brain Lower Grade Glioma (TCGA, Provisional)	TCGA-HT-7687	Anaplastic Oligoastrocytoma	G3	Missense Mutation			5282.75
Brain Lower Grade Glioma (TCGA, Provisional)	TCGA-HT-7855	Anaplastic Astrocytoma	G3	Missense Mutation		Missense Mutation (putative driver)	5289.25
Brain Lower Grade Glioma (TCGA, Provisional)	TCGA-DU-A5TU	Astrocytoma	G2	Missense Mutation		Missense Mutation (putative driver)	5341.94
Brain Lower Grade Glioma (TCGA, Provisional)	TCGA-P5-A5EV	Astrocytoma	G2	Missense Mutation		Missense Mutation (putative driver)	5351.05
Brain Lower Grade Glioma (TCGA, Provisional)	TCGA-HT-7858	Astrocytoma	G2	Missense Mutation		Missense Mutation (putative driver)	5391.79
Brain Lower Grade Glioma (TCGA, Provisional)	TCGA-DU-5872	Oligoastrocytoma	G2	Missense Mutation		Missense Mutation (putative driver)	5582.23
Glioblastoma (TCGA, Cell 2013)	TCGA-26-1442	Glioblastoma Multiforme	G4	Missense Mutation		Missense Mutation (putative driver)	5614	G-CIMP	METHYLATED	G-CIMP
Brain Lower Grade Glioma (TCGA, Provisional)	TCGA-HT-7483	Oligoastrocytoma	G2	Missense Mutation		Missense Mutation (putative driver)	5616.08
Brain Lower Grade Glioma (TCGA, Provisional)	TCGA-P5-A5EW	Astrocytoma	G2	Missense Mutation		Missense Mutation (putative driver)	5643.58
Brain Lower Grade Glioma (TCGA, Provisional)	TCGA-FG-7638	Anaplastic Oligoastrocytoma	G3	Missense Mutation			5656.98
Brain Lower Grade Glioma (TCGA, Provisional)	TCGA-DB-A64X	Anaplastic Astrocytoma	G3	Missense Mutation		Missense Mutation (putative driver)	5666.37
Brain Lower Grade Glioma (TCGA, Provisional)	TCGA-P5-A5ET	Oligodendroglioma	G2	Missense Mutation			5671.54
Brain Lower Grade Glioma (TCGA, Provisional)	TCGA-HT-8111	Oligoastrocytoma	G3	Missense Mutation		Missense Mutation (putative driver)	5739.39
Brain Lower Grade Glioma (TCGA, Provisional)	TCGA-DB-5281	Oligoastrocytoma	G3	Missense Mutation		Missense Mutation (putative driver)	5740.29
Brain Lower Grade Glioma (TCGA, Provisional)	TCGA-DU-8164	Oligodendroglioma	G2	Missense Mutation			5784.28
Brain Lower Grade Glioma (TCGA, Provisional)	TCGA-HT-A616	Astrocytoma	G2	Missense Mutation			5805.89
Brain Lower Grade Glioma (TCGA, Provisional)	TCGA-DB-A4XC	Oligoastrocytoma	G2	Missense Mutation		Truncating mutation (putative driver)	5931.72
Brain Lower Grade Glioma (TCGA, Provisional)	TCGA-E1-5311	Anaplastic Oligoastrocytoma	G3	Missense Mutation			5962.79
Brain Lower Grade Glioma (TCGA, Provisional)	TCGA-DU-6400	Oligodendroglioma	G2	Missense Mutation			5983.84
Brain Lower Grade Glioma (TCGA, Provisional)	TCGA-FG-7637	Oligoastrocytoma	G2	Missense Mutation			6076.11
Brain Lower Grade Glioma (TCGA, Provisional)	TCGA-DU-7300	Anaplastic Oligoastrocytoma	G3	Missense Mutation		Missense Mutation (putative driver)	6076.28
Brain Lower Grade Glioma (TCGA, Provisional)	TCGA-DB-A4XB	Anaplastic Astrocytoma	G3	Missense Mutation		Missense Mutation (putative driver)	6202.11
Brain Lower Grade Glioma (TCGA, Provisional)	TCGA-QH-A65S	Oligoastrocytoma	G2	Missense Mutation		Truncating mutation (putative driver)	6218.48
Brain Lower Grade Glioma (TCGA, Provisional)	TCGA-FG-7636	Anaplastic Astrocytoma	G3	Missense Mutation		Missense Mutation (putative driver)	6282.14
Brain Lower Grade Glioma (TCGA, Provisional)	TCGA-DU-8167	Oligoastrocytoma	G2	Missense Mutation		Truncating mutation (putative driver)	6305.37
Brain Lower Grade Glioma (TCGA, Provisional)	TCGA-DB-A64S	Oligoastrocytoma	G2	Missense Mutation		Missense Mutation (putative driver)	6336.28
Brain Lower Grade Glioma (TCGA, Provisional)	TCGA-DB-5273	Anaplastic Astrocytoma	G3	Missense Mutation		Missense Mutation (putative driver)	6376.71
Brain Lower Grade Glioma (TCGA, Provisional)	TCGA-HT-7689	Oligodendroglioma	G2	Missense Mutation		Missense Mutation (putative driver)	6386.38
Brain Lower Grade Glioma (TCGA, Provisional)	TCGA-E1-5302	Anaplastic Astrocytoma	G3	Missense Mutation		Truncating mutation (putative driver)	6411.26
Brain Lower Grade Glioma (TCGA, Provisional)	TCGA-P5-A5EU	Anaplastic Astrocytoma	G3	Missense Mutation		Missense Mutation (putative driver)	6421.47
Brain Lower Grade Glioma (TCGA, Provisional)	TCGA-DU-A5TR	Oligoastrocytoma	G2	Missense Mutation		Missense Mutation (putative driver)	6450.67
Brain Lower Grade Glioma (TCGA, Provisional)	TCGA-HT-7609	Oligoastrocytoma	G3	Missense Mutation		Truncating mutation (putative driver)	6456.42
Brain Lower Grade Glioma (TCGA, Provisional)	TCGA-E1-5319	Oligodendroglioma	G2	Missense Mutation			6506.83
Glioblastoma (TCGA, Cell 2013)	TCGA-15-1444	Glioblastoma Multiforme	G4	Missense Mutation		Missense Mutation (putative driver)	6682	non-G-CIMP	METHYLATED	Proneural
Brain Lower Grade Glioma (TCGA, Provisional)	TCGA-HT-7884	Astrocytoma	G2	Missense Mutation		Truncating mutation (putative driver)	6841.29
Brain Lower Grade Glioma (TCGA, Provisional)	TCGA-DB-A64W	Oligoastrocytoma	G3	Missense Mutation			6861.46
Brain Lower Grade Glioma (TCGA, Provisional)	TCGA-DU-8168	Anaplastic Oligoastrocytoma	G3	Missense Mutation			6864.81
Brain Lower Grade Glioma (TCGA, Provisional)	TCGA-FG-6690	Oligodendroglioma	G2	Missense Mutation		Truncating mutation (putative driver)	6876.8
Brain Lower Grade Glioma (TCGA, Provisional)	TCGA-HW-A5KL	Astrocytoma	G2	Missense Mutation		Missense Mutation (putative driver)	6899.36
Brain Lower Grade Glioma (TCGA, Provisional)	TCGA-FG-A60K	Oligoastrocytoma	G2	Missense Mutation			6905.47
Brain Lower Grade Glioma (TCGA, Provisional)	TCGA-FG-A4MX	Astrocytoma	G2	Missense Mutation		Missense Mutation (putative driver)	6958.84
Brain Lower Grade Glioma (TCGA, Provisional)	TCGA-DU-6399	Oligodendroglioma	G2	Missense Mutation		Truncating mutation (putative driver)	6985.52
Brain Lower Grade Glioma (TCGA, Provisional)	TCGA-CS-5393	Anaplastic Astrocytoma	G3	Missense Mutation		Missense Mutation (putative driver)	7025.22
Brain Lower Grade Glioma (TCGA, Provisional)	TCGA-HT-7677	Anaplastic Oligoastrocytoma	G3	Missense Mutation			7180.94
Brain Lower Grade Glioma (TCGA, Provisional)	TCGA-P5-A5F4	Anaplastic Oligoastrocytoma	G3	Missense Mutation		Missense Mutation (putative driver)	7228.49
Brain Lower Grade Glioma (TCGA, Provisional)	TCGA-FG-5965	Oligoastrocytoma	G2	Missense Mutation		Missense Mutation (putative driver)	7289.48
Brain Lower Grade Glioma (TCGA, Provisional)	TCGA-P5-A5EZ	Anaplastic Astrocytoma	G3	Missense Mutation		Truncating mutation (putative driver)	7336.89
Brain Lower Grade Glioma (TCGA, Provisional)	TCGA-FG-7634	Oligodendroglioma	G2	Missense Mutation			7338.76
Brain Lower Grade Glioma (TCGA, Provisional)	TCGA-HT-A614	Oligoastrocytoma	G2	Missense Mutation		Missense Mutation (putative driver)	7346.86
Brain Lower Grade Glioma (TCGA, Provisional)	TCGA-CS-6667	Astrocytoma	G2	Missense Mutation		Missense Mutation (putative driver)	7348.99
Brain Lower Grade Glioma (TCGA, Provisional)	TCGA-HT-7690	Oligoastrocytoma	G3	Missense Mutation		Missense Mutation (putative driver)	7411.32
Brain Lower Grade Glioma (TCGA, Provisional)	TCGA-HT-8108	Oligodendroglioma	G2	Missense Mutation		Truncating mutation (putative driver)	7465.79
Brain Lower Grade Glioma (TCGA, Provisional)	TCGA-HT-7604	Astrocytoma	G2	Missense Mutation		Truncating mutation (putative driver)	7503.4
Brain Lower Grade Glioma (TCGA, Provisional)	TCGA-DU-8166	Oligoastrocytoma	G2	Missense Mutation		Missense Mutation (putative driver)	7639.63
Brain Lower Grade Glioma (TCGA, Provisional)	TCGA-HW-A5KM	Astrocytoma	G2	Missense Mutation		Missense Mutation (putative driver)	7790.24
Brain Lower Grade Glioma (TCGA, Provisional)	TCGA-HW-8320	Anaplastic Astrocytoma	G3	Missense Mutation		Truncating mutation (putative driver)	7802.29
Brain Lower Grade Glioma (TCGA, Provisional)	TCGA-DU-7018	Anaplastic Oligoastrocytoma	G3	Missense Mutation			7807.94
Brain Lower Grade Glioma (TCGA, Provisional)	TCGA-DU-6393	Anaplastic Oligoastrocytoma	G3	Missense Mutation			7821.47
Brain Lower Grade Glioma (TCGA, Provisional)	TCGA-HW-8321	Astrocytoma	G3	Missense Mutation		Missense Mutation (putative driver)	8121.37
Brain Lower Grade Glioma (TCGA, Provisional)	TCGA-DU-7015	Oligodendroglioma	G2	Missense Mutation		Missense Mutation (putative driver)	8310.63
Brain Lower Grade Glioma (TCGA, Provisional)	TCGA-P5-A5F0	Oligodendroglioma	G2	Missense Mutation			8321.66
Brain Lower Grade Glioma (TCGA, Provisional)	TCGA-DU-5871	Oligoastrocytoma	G2	Missense Mutation		Missense Mutation (putative driver)	8331.36
Brain Lower Grade Glioma (TCGA, Provisional)	TCGA-FG-6691	Astrocytoma	G2	Missense Mutation		Inframe Mutation (putative driver)	8356.03
Brain Lower Grade Glioma (TCGA, Provisional)	TCGA-DB-A4X9	Oligoastrocytoma	G2	Missense Mutation		Missense Mutation (putative driver)	8475.22
Brain Lower Grade Glioma (TCGA, Provisional)	TCGA-DB-A64U	Oligoastrocytoma	G2	Missense Mutation			8723.82
Brain Lower Grade Glioma (TCGA, Provisional)	TCGA-DB-A4XF	Anaplastic Astrocytoma	G3	Missense Mutation		Missense Mutation (putative driver)	8784.34
Brain Lower Grade Glioma (TCGA, Provisional)	TCGA-FG-A4MY	Oligoastrocytoma	G2	Missense Mutation		Missense Mutation (putative driver)	8879.58
Brain Lower Grade Glioma (TCGA, Provisional)	TCGA-DH-5143	Oligoastrocytoma	G3	Missense Mutation		Missense Mutation (putative driver)	9098.93
Brain Lower Grade Glioma (TCGA, Provisional)	TCGA-DB-A64R	Oligodendroglioma	G2	Missense Mutation			9186.53
Brain Lower Grade Glioma (TCGA, Provisional)	TCGA-DB-A4XE	Oligoastrocytoma	G3	Missense Mutation		Truncating mutation (putative driver)	9197.65
Brain Lower Grade Glioma (TCGA, Provisional)	TCGA-DH-5144	Anaplastic Oligoastrocytoma	G3	Missense Mutation			9301.01
Brain Lower Grade Glioma (TCGA, Provisional)	TCGA-DU-6401	Oligodendroglioma	G2	Missense Mutation		Missense Mutation (putative driver)	9514.79
Brain Lower Grade Glioma (TCGA, Provisional)	TCGA-DU-5870	Oligodendroglioma	G2	Missense Mutation			9543.66
Glioblastoma (TCGA, Cell 2013)	TCGA-27-2521	Glioblastoma Multiforme	G4	Missense Mutation		Truncating mutation (putative driver)	9577	G-CIMP	METHYLATED	G-CIMP
Brain Lower Grade Glioma (TCGA, Provisional)	TCGA-DU-6396	Oligoastrocytoma	G3	Missense Mutation		Missense Mutation (putative driver)	9587.04
Brain Lower Grade Glioma (TCGA, Provisional)	TCGA-HT-7480	Oligodendroglioma	G2	Missense Mutation			9594.8
Brain Lower Grade Glioma (TCGA, Provisional)	TCGA-FG-8182	Oligodendroglioma	G2	Missense Mutation		Truncating mutation (putative driver)	10013.5
Brain Lower Grade Glioma (TCGA, Provisional)	TCGA-DU-8163	Oligoastrocytoma	G3	Missense Mutation		Missense Mutation (putative driver)	10229
Brain Lower Grade Glioma (TCGA, Provisional)	TCGA-HT-7472	Oligodendroglioma	G2	Missense Mutation		Missense Mutation (putative driver)	10344.6
Brain Lower Grade Glioma (TCGA, Provisional)	TCGA-DU-A5TW	Anaplastic Astrocytoma	G3	Missense Mutation		Truncating mutation (putative driver)	10379.9
Brain Lower Grade Glioma (TCGA, Provisional)	TCGA-DB-5278	Oligodendroglioma	G2	Missense Mutation			10411.7
Brain Lower Grade Glioma (TCGA, Provisional)	TCGA-DU-7294	Oligodendroglioma	G2	Missense Mutation			10453.6
Brain Lower Grade Glioma (TCGA, Provisional)	TCGA-HT-7879	Oligoastrocytoma	G3	Missense Mutation		Truncating mutation (putative driver)	10532.8
Brain Lower Grade Glioma (TCGA, Provisional)	TCGA-CS-6668	Oligodendroglioma	G2	Missense Mutation			10661.4
Brain Lower Grade Glioma (TCGA, Provisional)	TCGA-FG-5964	Oligodendroglioma	G2	Missense Mutation			10893.5
Brain Lower Grade Glioma (TCGA, Provisional)	TCGA-HT-7468	Anaplastic Oligoastrocytoma	G3	Missense Mutation			10900
Brain Lower Grade Glioma (TCGA, Provisional)	TCGA-HT-A5RB	Astrocytoma	G2	Missense Mutation		Missense Mutation (putative driver)	10918
Brain Lower Grade Glioma (TCGA, Provisional)	TCGA-CS-6666	Anaplastic Astrocytoma	G3	Missense Mutation		Missense Mutation (putative driver)	10942
Brain Lower Grade Glioma (TCGA, Provisional)	TCGA-DU-6542	Oligoastrocytoma	G3	Missense Mutation		Missense Mutation (putative driver)	11010
Brain Lower Grade Glioma (TCGA, Provisional)	TCGA-DB-A4XD	Anaplastic Astrocytoma	G3	Missense Mutation		Missense Mutation (putative driver)	11347
Glioblastoma (TCGA, Cell 2013)	TCGA-02-2483	Glioblastoma Multiforme	G4	Missense Mutation			11591	G-CIMP	METHYLATED	G-CIMP
Brain Lower Grade Glioma (TCGA, Provisional)	TCGA-DB-A4XA	Oligoastrocytoma	G2	Missense Mutation			11772.5
Glioblastoma (TCGA, Cell 2013)	TCGA-06-2570	Glioblastoma Multiforme	G4	Missense Mutation			11985	G-CIMP	METHYLATED	G-CIMP
Brain Lower Grade Glioma (TCGA, Provisional)	TCGA-HT-7676	Oligodendroglioma	G2	Missense Mutation		Missense Mutation (putative driver)	12085.6
Brain Lower Grade Glioma (TCGA, Provisional)	TCGA-EZ-7264	Oligodendroglioma	G2	Missense Mutation			12286.4
Brain Lower Grade Glioma (TCGA, Provisional)	TCGA-HW-8322	Oligodendroglioma	G2	Missense Mutation			12301.1
Brain Lower Grade Glioma (TCGA, Provisional)	TCGA-DB-5274	Oligoastrocytoma	G3	Missense Mutation			12727
Brain Lower Grade Glioma (TCGA, Provisional)	TCGA-HT-A619	Anaplastic Oligoastrocytoma	G3	Missense Mutation			14089
Brain Lower Grade Glioma (TCGA, Provisional)	TCGA-DU-6395	Oligoastrocytoma	G2	Missense Mutation		Missense Mutation (putative driver)	14408.8
Brain Lower Grade Glioma (TCGA, Provisional)	TCGA-FG-8185	Anaplastic Astrocytoma	G3	Missense Mutation		Missense Mutation (putative driver)	14896.3
Brain Lower Grade Glioma (TCGA, Provisional)	TCGA-DB-5275	Oligoastrocytoma	G3	Missense Mutation		Missense Mutation (putative driver)	14956.3
Glioblastoma (TCGA, Cell 2013)	TCGA-06-0129	Glioblastoma Multiforme	G4	Missense Mutation			15618	G-CIMP	METHYLATED	G-CIMP
Brain Lower Grade Glioma (TCGA, Provisional)	TCGA-DU-7008	Oligodendroglioma	G2	Missense Mutation		Missense Mutation (putative driver)	15767.4
Brain Lower Grade Glioma (TCGA, Provisional)	TCGA-HT-8013	Oligoastrocytoma	G2	Missense Mutation		Missense Mutation (putative driver)	16334.6
Brain Lower Grade Glioma (TCGA, Provisional)	TCGA-DU-6397	Anaplastic Oligoastrocytoma	G3	Missense Mutation			16943.9
Brain Lower Grade Glioma (TCGA, Provisional)	TCGA-HT-8012	Oligodendroglioma	G2	Missense Mutation			19982.5
Brain Lower Grade Glioma (TCGA, Provisional)	TCGA-DU-6407	Oligodendroglioma	G2	Missense Mutation		Missense Mutation (putative driver)	20689
Brain Lower Grade Glioma (TCGA, Provisional)	TCGA-CS-4942	Anaplastic Astrocytoma	G3	Missense Mutation		Missense Mutation (putative driver)	21187.2
Brain Lower Grade Glioma (TCGA, Provisional)	TCGA-FG-8189	Oligodendroglioma	G2		Missense Mutation		495.668
Brain Lower Grade Glioma (TCGA, Provisional)	TCGA-HT-8113	Oligodendroglioma	G2		Missense Mutation		1566.95
Brain Lower Grade Glioma (TCGA, Provisional)	TCGA-HT-7856	Anaplastic Oligoastrocytoma	G3		Missense Mutation		1984.47
Brain Lower Grade Glioma (TCGA, Provisional)	TCGA-DU-7309	Anaplastic Oligoastrocytoma	G3		Missense Mutation	Missense Mutation (putative driver)	2860.15
Brain Lower Grade Glioma (TCGA, Provisional)	TCGA-DB-A4XG	Anaplastic Oligoastrocytoma	G3		Missense Mutation		3261.81
Brain Lower Grade Glioma (TCGA, Provisional)	TCGA-DU-5849	Oligodendroglioma	G2		Missense Mutation		3748.22
Brain Lower Grade Glioma (TCGA, Provisional)	TCGA-HT-7681	Oligoastrocytoma	G2		Missense Mutation		4701.08
Brain Lower Grade Glioma (TCGA, Provisional)	TCGA-HT-7476	Astrocytoma	G2		Missense Mutation	Missense Mutation (putative driver)	4912.95
Brain Lower Grade Glioma (TCGA, Provisional)	TCGA-HT-A5R9	Anaplastic Oligoastrocytoma	G3		Missense Mutation		5395.48
Brain Lower Grade Glioma (TCGA, Provisional)	TCGA-HW-7491	Oligodendroglioma	G2		Missense Mutation		5648.25
Brain Lower Grade Glioma (TCGA, Provisional)	TCGA-DH-5141	Anaplastic Oligoastrocytoma	G3		Missense Mutation		5663.19
Brain Lower Grade Glioma (TCGA, Provisional)	TCGA-E1-5318	Oligodendroglioma	G2		Missense Mutation		7375.52
Brain Lower Grade Glioma (TCGA, Provisional)	TCGA-P5-A5F6	Oligodendroglioma	G2				1.8116
Glioblastoma (TCGA, Cell 2013)	TCGA-41-2572	Glioblastoma Multiforme	G4				8	non-G-CIMP	UNMETHYLATED	Classical
Glioblastoma (TCGA, Cell 2013)	TCGA-06-0130	Glioblastoma Multiforme	G4			Missense Mutation (putative driver)	9	non-G-CIMP	UNMETHYLATED	Mesenchymal
Brain Lower Grade Glioma (TCGA, Provisional)	TCGA-HT-7680	Astrocytoma	G2				11.7614
Glioblastoma (TCGA, Cell 2013)	TCGA-28-2499	Glioblastoma Multiforme	G4				13	non-G-CIMP	UNMETHYLATED
Glioblastoma (TCGA, Cell 2013)	TCGA-06-2569	Glioblastoma Multiforme	G4			Inframe Mutation (putative driver)	14	non-G-CIMP	UNMETHYLATED	Mesenchymal
Brain Lower Grade Glioma (TCGA, Provisional)	TCGA-HT-7857	Anaplastic Astrocytoma	G3				14.9215
Glioblastoma (TCGA, Cell 2013)	TCGA-02-2486	Glioblastoma Multiforme	G4				15	non-G-CIMP	UNMETHYLATED	Mesenchymal
Glioblastoma (TCGA, Cell 2013)	TCGA-27-1835	Glioblastoma Multiforme	G4				16	non-G-CIMP	METHYLATED	Classical
Brain Lower Grade Glioma (TCGA, Provisional)	TCGA-DU-7290	Anaplastic Astrocytoma	G3				19.0227
Brain Lower Grade Glioma (TCGA, Provisional)	TCGA-DU-6402	Anaplastic Astrocytoma	G3				25.0212
Brain Lower Grade Glioma (TCGA, Provisional)	TCGA-DU-8165	Oligodendroglioma	G3			Missense Mutation (putative driver)	33.4084
Glioblastoma (TCGA, Cell 2013)	TCGA-02-0055	Glioblastoma Multiforme	G4				35	non-G-CIMP	UNMETHYLATED	Mesenchymal
Glioblastoma (TCGA, Cell 2013)	TCGA-19-2625	Glioblastoma Multiforme	G4			Missense Mutation (putative driver)	39	non-G-CIMP	UNMETHYLATED	Classical
Glioblastoma (TCGA, Cell 2013)	TCGA-14-1034	Glioblastoma Multiforme	G4				43	non-G-CIMP	METHYLATED	Mesenchymal
Glioblastoma (TCGA, Cell 2013)	TCGA-06-0644	Glioblastoma Multiforme	G4				46	non-G-CIMP		Mesenchymal
Glioblastoma (TCGA, Cell 2013)	TCGA-06-5410	Glioblastoma Multiforme	G4				47	non-G-CIMP	METHYLATED	Mesenchymal
Glioblastoma (TCGA, Cell 2013)	TCGA-14-0871	Glioblastoma Multiforme	G4			Truncating mutation (putative driver)	52	non-G-CIMP	UNMETHYLATED	Mesenchymal
Glioblastoma (TCGA, Cell 2013)	TCGA-06-5412	Glioblastoma Multiforme	G4				65	non-G-CIMP	METHYLATED	Mesenchymal
Glioblastoma (TCGA, Cell 2013)	TCGA-06-0168	Glioblastoma Multiforme	G4				70	non-G-CIMP		Mesenchymal
Brain Lower Grade Glioma (TCGA, Provisional)	TCGA-DU-6404	Anaplastic Oligoastrocytoma	G3				70.704
Glioblastoma (TCGA, Cell 2013)	TCGA-28-5218	Glioblastoma Multiforme	G4				76	non-G-CIMP	UNMETHYLATED	Mesenchymal
Brain Lower Grade Glioma (TCGA, Provisional)	TCGA-HT-7882	Anaplastic Oligoastrocytoma	G3				79.5791
Brain Lower Grade Glioma (TCGA, Provisional)	TCGA-HT-8558	Oligodendroglioma	G2				96.7142
Glioblastoma (TCGA, Cell 2013)	TCGA-32-2632	Glioblastoma Multiforme	G4				100	non-G-CIMP	UNMETHYLATED	Mesenchymal
Glioblastoma (TCGA, Cell 2013)	TCGA-12-3653	Glioblastoma Multiforme	G4				101	non-G-CIMP	UNMETHYLATED	Classical
Glioblastoma (TCGA, Cell 2013)	TCGA-14-1823	Glioblastoma Multiforme	G4				104	non-G-CIMP	METHYLATED	Mesenchymal
Brain Lower Grade Glioma (TCGA, Provisional)	TCGA-HT-8019	Anaplastic Oligoastrocytoma	G3				126.948
Brain Lower Grade Glioma (TCGA, Provisional)	TCGA-DU-5847	Anaplastic Astrocytoma	G3				129.728
Glioblastoma (TCGA, Cell 2013)	TCGA-41-4097	Glioblastoma Multiforme	G4				133	non-G-CIMP	UNMETHYLATED	Mesenchymal
Glioblastoma (TCGA, Cell 2013)	TCGA-14-0781	Glioblastoma Multiforme	G4				139	non-G-CIMP	UNMETHYLATED	Mesenchymal
Glioblastoma (TCGA, Cell 2013)	TCGA-06-0878	Glioblastoma Multiforme	G4				147	non-G-CIMP	UNMETHYLATED	Mesenchymal
Brain Lower Grade Glioma (TCGA, Provisional)	TCGA-HT-8015	Astrocytoma	G2				149.479
Brain Lower Grade Glioma (TCGA, Provisional)	TCGA-HT-7854	Astrocytoma	G2				156.623
Glioblastoma (TCGA, Cell 2013)	TCGA-28-2509	Glioblastoma Multiforme	G4				163	non-G-CIMP	METHYLATED	Mesenchymal
Glioblastoma (TCGA, Cell 2013)	TCGA-28-5213	Glioblastoma Multiforme	G4				166	non-G-CIMP	UNMETHYLATED	Mesenchymal
Glioblastoma (TCGA, Cell 2013)	TCGA-32-1982	Glioblastoma Multiforme	G4				166	non-G-CIMP	METHYLATED	Neural
Glioblastoma (TCGA, Cell 2013)	TCGA-06-0184	Glioblastoma Multiforme	G4			Missense Mutation (putative driver)	168	non-G-CIMP		Mesenchymal
Glioblastoma (TCGA, Cell 2013)	TCGA-14-0789	Glioblastoma Multiforme	G4				181	non-G-CIMP	METHYLATED	Mesenchymal
Brain Lower Grade Glioma (TCGA, Provisional)	TCGA-HT-A5RC	Anaplastic Astrocytoma	G3				185.639
Brain Lower Grade Glioma (TCGA, Provisional)	TCGA-CS-5397	Anaplastic Astrocytoma	G3				185.82
Brain Lower Grade Glioma (TCGA, Provisional)	TCGA-DU-8161	Oligoastrocytoma	G3				186.743
Glioblastoma (TCGA, Cell 2013)	TCGA-27-1832	Glioblastoma Multiforme	G4				188	non-G-CIMP	UNMETHYLATED	Mesenchymal
Glioblastoma (TCGA, Cell 2013)	TCGA-32-5222	Glioblastoma Multiforme	G4				205	non-G-CIMP	METHYLATED	Proneural
Brain Lower Grade Glioma (TCGA, Provisional)	TCGA-CS-6186	Oligoastrocytoma	G3				218.452
Brain Lower Grade Glioma (TCGA, Provisional)	TCGA-FG-7643	Oligoastrocytoma	G2				261.784
Brain Lower Grade Glioma (TCGA, Provisional)	TCGA-DU-8158	Anaplastic Astrocytoma	G3				273.086
Brain Lower Grade Glioma (TCGA, Provisional)	TCGA-FG-6688	Anaplastic Astrocytoma	G3				274.332
Brain Lower Grade Glioma (TCGA, Provisional)	TCGA-P5-A5EY	Astrocytoma	G2				275.51
Brain Lower Grade Glioma (TCGA, Provisional)	TCGA-DB-A64O	Oligoastrocytoma	G2				289.438
Glioblastoma (TCGA, Cell 2013)	TCGA-06-2561	Glioblastoma Multiforme	G4				298	non-G-CIMP	UNMETHYLATED	Mesenchymal
Glioblastoma (TCGA, Cell 2013)	TCGA-06-0141	Glioblastoma Multiforme	G4				300	non-G-CIMP	UNMETHYLATED	Mesenchymal
Glioblastoma (TCGA, Cell 2013)	TCGA-12-5295	Glioblastoma Multiforme	G4				318	non-G-CIMP	METHYLATED	Neural
Brain Lower Grade Glioma (TCGA, Provisional)	TCGA-HT-7691	Astrocytoma	G2				319.405
Brain Lower Grade Glioma (TCGA, Provisional)	TCGA-DU-5854	Anaplastic Astrocytoma	G3				324.119
Brain Lower Grade Glioma (TCGA, Provisional)	TCGA-DU-7012	Anaplastic Astrocytoma	G3				327.134
Brain Lower Grade Glioma (TCGA, Provisional)	TCGA-HT-A617	Oligodendroglioma	G2				327.519
Glioblastoma (TCGA, Cell 2013)	TCGA-26-5136	Glioblastoma Multiforme	G4			Missense Mutation (putative driver)	329	non-G-CIMP	METHYLATED	Mesenchymal
Glioblastoma (TCGA, Cell 2013)	TCGA-27-1831	Glioblastoma Multiforme	G4				342	non-G-CIMP	UNMETHYLATED	Neural
Brain Lower Grade Glioma (TCGA, Provisional)	TCGA-HT-A5RA	Anaplastic Astrocytoma	G3				342.487
Brain Lower Grade Glioma (TCGA, Provisional)	TCGA-DU-A5TT	Anaplastic Oligoastrocytoma	G3			Truncating mutation (putative driver)	374.483
Brain Lower Grade Glioma (TCGA, Provisional)	TCGA-DU-8162	Oligoastrocytoma	G3				374.694
Glioblastoma (TCGA, Cell 2013)	TCGA-06-5858	Glioblastoma Multiforme	G4			Missense Mutation (putative driver)	378	non-G-CIMP	METHYLATED	Mesenchymal
Glioblastoma (TCGA, Cell 2013)	TCGA-06-2562	Glioblastoma Multiforme	G4				394	non-G-CIMP	UNMETHYLATED	Mesenchymal
Glioblastoma (TCGA, Cell 2013)	TCGA-76-4925	Glioblastoma Multiforme	G4			Missense Mutation (putative driver)	447	non-G-CIMP	METHYLATED	Proneural
Brain Lower Grade Glioma (TCGA, Provisional)	TCGA-HW-A5KK	Anaplastic Astrocytoma	G3				448.191
Glioblastoma (TCGA, Cell 2013)	TCGA-06-0649	Glioblastoma Multiforme	G4				480	non-G-CIMP		Neural
Glioblastoma (TCGA, Cell 2013)	TCGA-14-1829	Glioblastoma Multiforme	G4				526	non-G-CIMP	UNMETHYLATED	Neural
Glioblastoma (TCGA, Cell 2013)	TCGA-32-2615	Glioblastoma Multiforme	G4				531	non-G-CIMP	UNMETHYLATED	Mesenchymal
Glioblastoma (TCGA, Cell 2013)	TCGA-32-1980	Glioblastoma Multiforme	G4				534	non-G-CIMP	UNMETHYLATED	Neural
Glioblastoma (TCGA, Cell 2013)	TCGA-32-4213	Glioblastoma Multiforme	G4				543	non-G-CIMP	METHYLATED	Mesenchymal
Glioblastoma (TCGA, Cell 2013)	TCGA-26-5139	Glioblastoma Multiforme	G4				576	non-G-CIMP	UNMETHYLATED	Mesenchymal
Glioblastoma (TCGA, Cell 2013)	TCGA-06-2563	Glioblastoma Multiforme	G4			Missense Mutation (putative driver)	600	non-G-CIMP	METHYLATED	Classical
Brain Lower Grade Glioma (TCGA, Provisional)	TCGA-DU-7006	Anaplastic Astrocytoma	G3				608.496
Brain Lower Grade Glioma (TCGA, Provisional)	TCGA-DU-5852	Oligoastrocytoma	G3				623.728
Glioblastoma (TCGA, Cell 2013)	TCGA-16-1045	Glioblastoma Multiforme	G4				637	non-G-CIMP	METHYLATED	Mesenchymal
Brain Lower Grade Glioma (TCGA, Provisional)	TCGA-CS-4941	Anaplastic Astrocytoma	G3				661.836
Glioblastoma (TCGA, Cell 2013)	TCGA-14-0787	Glioblastoma Multiforme	G4				681	non-G-CIMP	METHYLATED	Classical
Glioblastoma (TCGA, Cell 2013)	TCGA-08-0386	Glioblastoma Multiforme	G4				699	non-G-CIMP		Neural
Glioblastoma (TCGA, Cell 2013)	TCGA-14-1825	Glioblastoma Multiforme	G4			Truncating mutation (putative driver)	707	non-G-CIMP	UNMETHYLATED	Proneural
Brain Lower Grade Glioma (TCGA, Provisional)	TCGA-HT-7860	Anaplastic Astrocytoma	G3				714.697
Brain Lower Grade Glioma (TCGA, Provisional)	TCGA-FG-6692	Anaplastic Oligoastrocytoma	G3				717.578
Glioblastoma (TCGA, Cell 2013)	TCGA-06-0882	Glioblastoma Multiforme	G4				741	non-G-CIMP	UNMETHYLATED	Neural
Brain Lower Grade Glioma (TCGA, Provisional)	TCGA-DU-7292	Anaplastic Astrocytoma	G3				749.601
Glioblastoma (TCGA, Cell 2013)	TCGA-06-0210	Glioblastoma Multiforme	G4				754	non-G-CIMP		Mesenchymal
Glioblastoma (TCGA, Cell 2013)	TCGA-06-2567	Glioblastoma Multiforme	G4			Truncating mutation (putative driver)	760	non-G-CIMP	METHYLATED	Neural
Glioblastoma (TCGA, Cell 2013)	TCGA-06-0219	Glioblastoma Multiforme	G4				764	non-G-CIMP		Neural
Glioblastoma (TCGA, Cell 2013)	TCGA-06-5856	Glioblastoma Multiforme	G4				788	non-G-CIMP	UNMETHYLATED	Classical
Glioblastoma (TCGA, Cell 2013)	TCGA-06-0747	Glioblastoma Multiforme	G4				798	non-G-CIMP		Classical
Glioblastoma (TCGA, Cell 2013)	TCGA-12-0616	Glioblastoma Multiforme	G4				802	non-G-CIMP		Proneural
Glioblastoma (TCGA, Cell 2013)	TCGA-14-2554	Glioblastoma Multiforme	G4				815	non-G-CIMP	UNMETHYLATED	Neural
Glioblastoma (TCGA, Cell 2013)	TCGA-06-0132	Glioblastoma Multiforme	G4				853	non-G-CIMP		Neural
Brain Lower Grade Glioma (TCGA, Provisional)	TCGA-HT-8104	Anaplastic Astrocytoma	G3				870.164
Glioblastoma (TCGA, Cell 2013)	TCGA-12-0619	Glioblastoma Multiforme	G4			Missense Mutation (putative driver)	885	non-G-CIMP		Mesenchymal
Glioblastoma (TCGA, Cell 2013)	TCGA-28-5207	Glioblastoma Multiforme	G4			Missense Mutation (putative driver)	895	non-G-CIMP	UNMETHYLATED	Mesenchymal
Glioblastoma (TCGA, Cell 2013)	TCGA-76-4926	Glioblastoma Multiforme	G4				902	non-G-CIMP	UNMETHYLATED	Classical
Glioblastoma (TCGA, Cell 2013)	TCGA-27-2519	Glioblastoma Multiforme	G4			Truncating mutation (putative driver)	930	non-G-CIMP	UNMETHYLATED	Mesenchymal
Glioblastoma (TCGA, Cell 2013)	TCGA-26-5132	Glioblastoma Multiforme	G4				959	non-G-CIMP	METHYLATED	Classical
Brain Lower Grade Glioma (TCGA, Provisional)	TCGA-HT-8110	Anaplastic Astrocytoma	G3				961.498
Glioblastoma (TCGA, Cell 2013)	TCGA-06-0750	Glioblastoma Multiforme	G4				999	non-G-CIMP		Mesenchymal
Brain Lower Grade Glioma (TCGA, Provisional)	TCGA-HT-8564	Anaplastic Astrocytoma	G3			Missense Mutation (putative driver)	1003.81
Glioblastoma (TCGA, Cell 2013)	TCGA-27-2528	Glioblastoma Multiforme	G4				1010	non-G-CIMP	METHYLATED	Classical
Glioblastoma (TCGA, Cell 2013)	TCGA-12-3652	Glioblastoma Multiforme	G4				1022	non-G-CIMP	UNMETHYLATED	Classical
Brain Lower Grade Glioma (TCGA, Provisional)	TCGA-HT-A4DS	Anaplastic Astrocytoma	G3			Missense Mutation (putative driver)	1038.97
Glioblastoma (TCGA, Cell 2013)	TCGA-06-1804	Glioblastoma Multiforme	G4				1046	non-G-CIMP	METHYLATED	Classical
Glioblastoma (TCGA, Cell 2013)	TCGA-41-3915	Glioblastoma Multiforme	G4				1054	non-G-CIMP	METHYLATED	Mesenchymal
Brain Lower Grade Glioma (TCGA, Provisional)	TCGA-FG-A4MU	Oligoastrocytoma	G3				1059.98
Glioblastoma (TCGA, Cell 2013)	TCGA-06-5418	Glioblastoma Multiforme	G4				1109	non-G-CIMP	UNMETHYLATED	Mesenchymal
Brain Lower Grade Glioma (TCGA, Provisional)	TCGA-DU-A5TY	Anaplastic Astrocytoma	G3				1110.94
Glioblastoma (TCGA, Cell 2013)	TCGA-27-1834	Glioblastoma Multiforme	G4				1117	non-G-CIMP	METHYLATED	Neural
Glioblastoma (TCGA, Cell 2013)	TCGA-06-5408	Glioblastoma Multiforme	G4				1135	non-G-CIMP	UNMETHYLATED	Classical
Glioblastoma (TCGA, Cell 2013)	TCGA-06-5414	Glioblastoma Multiforme	G4				1149	non-G-CIMP	UNMETHYLATED	Classical
Glioblastoma (TCGA, Cell 2013)	TCGA-06-0646	Glioblastoma Multiforme	G4				1152	non-G-CIMP		Proneural
Glioblastoma (TCGA, Cell 2013)	TCGA-06-0749	Glioblastoma Multiforme	G4				1173	non-G-CIMP		Neural
Glioblastoma (TCGA, Cell 2013)	TCGA-19-2620	Glioblastoma Multiforme	G4				1180	non-G-CIMP	METHYLATED	Neural
Glioblastoma (TCGA, Cell 2013)	TCGA-32-1970	Glioblastoma Multiforme	G4			Missense Mutation (putative driver)	1223	non-G-CIMP	UNMETHYLATED	Classical
Glioblastoma (TCGA, Cell 2013)	TCGA-76-4929	Glioblastoma Multiforme	G4			Truncating mutation (putative driver)	1287	non-G-CIMP	METHYLATED	Neural
Glioblastoma (TCGA, Cell 2013)	TCGA-32-2638	Glioblastoma Multiforme	G4				1296	non-G-CIMP	METHYLATED	Classical
Glioblastoma (TCGA, Cell 2013)	TCGA-76-4928	Glioblastoma Multiforme	G4				1335	non-G-CIMP	METHYLATED	Classical
Glioblastoma (TCGA, Cell 2013)	TCGA-28-2514	Glioblastoma Multiforme	G4				1344	non-G-CIMP	UNMETHYLATED	Classical
Brain Lower Grade Glioma (TCGA, Provisional)	TCGA-CS-6188	Anaplastic Astrocytoma	G3				1350.45
Glioblastoma (TCGA, Cell 2013)	TCGA-28-2513	Glioblastoma Multiforme	G4				1371	non-G-CIMP	UNMETHYLATED	Mesenchymal
Glioblastoma (TCGA, Cell 2013)	TCGA-06-2564	Glioblastoma Multiforme	G4				1372	non-G-CIMP	UNMETHYLATED	Classical
Brain Lower Grade Glioma (TCGA, Provisional)	TCGA-DH-5140	Oligoastrocytoma	G3			Truncating mutation (putative driver)	1377.84
Glioblastoma (TCGA, Cell 2013)	TCGA-76-4932	Glioblastoma Multiforme	G4				1397	non-G-CIMP	METHYLATED	Proneural
Glioblastoma (TCGA, Cell 2013)	TCGA-28-5220	Glioblastoma Multiforme	G4				1400	non-G-CIMP	UNMETHYLATED	Classical
Glioblastoma (TCGA, Cell 2013)	TCGA-26-5134	Glioblastoma Multiforme	G4				1406	non-G-CIMP	UNMETHYLATED	Proneural
Glioblastoma (TCGA, Cell 2013)	TCGA-28-2510	Glioblastoma Multiforme	G4				1440
Glioblastoma (TCGA, Cell 2013)	TCGA-28-5216	Glioblastoma Multiforme	G4			Missense Mutation (putative driver)	1474	non-G-CIMP	UNMETHYLATED	Mesenchymal
Glioblastoma (TCGA, Cell 2013)	TCGA-06-5859	Glioblastoma Multiforme	G4				1491	non-G-CIMP	UNMETHYLATED	Neural
Brain Lower Grade Glioma (TCGA, Provisional)	TCGA-HT-A61C	Anaplastic Oligoastrocytoma	G3				1506.32
Glioblastoma (TCGA, Cell 2013)	TCGA-27-2524	Glioblastoma Multiforme	G4				1509	non-G-CIMP	UNMETHYLATED	Mesenchymal
Glioblastoma (TCGA, Cell 2013)	TCGA-14-0817	Glioblastoma Multiforme	G4			Truncating mutation (putative driver)	1553	non-G-CIMP	UNMETHYLATED	Neural
Brain Lower Grade Glioma (TCGA, Provisional)	TCGA-DU-7013	Anaplastic Astrocytoma	G3			Missense Mutation (putative driver)	1559.78
Glioblastoma (TCGA, Cell 2013)	TCGA-06-0190	Glioblastoma Multiforme	G4				1596	non-G-CIMP		Mesenchymal
Glioblastoma (TCGA, Cell 2013)	TCGA-19-2619	Glioblastoma Multiforme	G4				1613	non-G-CIMP	METHYLATED	Classical
Glioblastoma (TCGA, Cell 2013)	TCGA-27-1830	Glioblastoma Multiforme	G4				1752	non-G-CIMP	METHYLATED	Proneural
Glioblastoma (TCGA, Cell 2013)	TCGA-76-4927	Glioblastoma Multiforme	G4				1754	non-G-CIMP	UNMETHYLATED	Neural
Glioblastoma (TCGA, Cell 2013)	TCGA-06-2559	Glioblastoma Multiforme	G4			Missense Mutation (putative driver)	1798	non-G-CIMP	METHYLATED	Proneural
Glioblastoma (TCGA, Cell 2013)	TCGA-19-1390	Glioblastoma Multiforme	G4				1939	non-G-CIMP	METHYLATED	Proneural
Glioblastoma (TCGA, Cell 2013)	TCGA-12-0821	Glioblastoma Multiforme	G4				1982	non-G-CIMP	UNMETHYLATED	Neural
Glioblastoma (TCGA, Cell 2013)	TCGA-28-1753	Glioblastoma Multiforme	G4				2061	non-G-CIMP	UNMETHYLATED	Mesenchymal
Brain Lower Grade Glioma (TCGA, Provisional)	TCGA-HT-7469	Anaplastic Oligoastrocytoma	G3			Missense Mutation (putative driver)	2226.67
Glioblastoma (TCGA, Cell 2013)	TCGA-27-1837	Glioblastoma Multiforme	G4				2328	non-G-CIMP	METHYLATED	Classical
Brain Lower Grade Glioma (TCGA, Provisional)	TCGA-CS-5395	Oligodendroglioma	G2				2342.24
Glioblastoma (TCGA, Cell 2013)	TCGA-06-2565	Glioblastoma Multiforme	G4				2480	non-G-CIMP	METHYLATED	Classical
Brain Lower Grade Glioma (TCGA, Provisional)	TCGA-FG-5963	Anaplastic Astrocytoma	G3			Missense Mutation (putative driver)	2558.12
Glioblastoma (TCGA, Cell 2013)	TCGA-06-0125	Glioblastoma Multiforme	G4				2570	non-G-CIMP	METHYLATED	Classical
Glioblastoma (TCGA, Cell 2013)	TCGA-06-5411	Glioblastoma Multiforme	G4				2621	non-G-CIMP	UNMETHYLATED	Neural
Glioblastoma (TCGA, Cell 2013)	TCGA-12-5299	Glioblastoma Multiforme	G4				2769	non-G-CIMP	UNMETHYLATED	Classical
Glioblastoma (TCGA, Cell 2013)	TCGA-32-2634	Glioblastoma Multiforme	G4			Missense Mutation (putative driver)	2820	non-G-CIMP	METHYLATED	Proneural
Glioblastoma (TCGA, Cell 2013)	TCGA-06-0743	Glioblastoma Multiforme	G4			Missense Mutation (putative driver)	2845	non-G-CIMP		Classical
Glioblastoma (TCGA, Cell 2013)	TCGA-27-2526	Glioblastoma Multiforme	G4				3096	non-G-CIMP	UNMETHYLATED	Neural
Glioblastoma (TCGA, Cell 2013)	TCGA-28-5208	Glioblastoma Multiforme	G4				3255	non-G-CIMP	METHYLATED	Mesenchymal
Glioblastoma (TCGA, Cell 2013)	TCGA-14-0790	Glioblastoma Multiforme	G4				3351	non-G-CIMP	METHYLATED	Classical
Glioblastoma (TCGA, Cell 2013)	TCGA-06-0645	Glioblastoma Multiforme	G4				3495	non-G-CIMP		Mesenchymal
Brain Lower Grade Glioma (TCGA, Provisional)	TCGA-FG-A4MW	Oligoastrocytoma	G3				3604.06
Glioblastoma (TCGA, Cell 2013)	TCGA-19-2624	Glioblastoma Multiforme	G4				3644	non-G-CIMP	UNMETHYLATED	Proneural
Glioblastoma (TCGA, Cell 2013)	TCGA-15-0742	Glioblastoma Multiforme	G4				3782	non-G-CIMP		Classical
Glioblastoma (TCGA, Cell 2013)	TCGA-06-2557	Glioblastoma Multiforme	G4				3844	non-G-CIMP	UNMETHYLATED	Mesenchymal
Brain Lower Grade Glioma (TCGA, Provisional)	TCGA-DU-6405	Anaplastic Astrocytoma	G3				3941.72
Glioblastoma (TCGA, Cell 2013)	TCGA-28-5209	Glioblastoma Multiforme	G4				3970	non-G-CIMP	METHYLATED	Mesenchymal
Glioblastoma (TCGA, Cell 2013)	TCGA-06-0158	Glioblastoma Multiforme	G4				4527	non-G-CIMP		Classical
Glioblastoma (TCGA, Cell 2013)	TCGA-12-3650	Glioblastoma Multiforme	G4				4640	non-G-CIMP	UNMETHYLATED	Proneural
Glioblastoma (TCGA, Cell 2013)	TCGA-06-0211	Glioblastoma Multiforme	G4				4694	non-G-CIMP		Classical
Glioblastoma (TCGA, Cell 2013)	TCGA-06-5413	Glioblastoma Multiforme	G4				4717	non-G-CIMP	UNMETHYLATED	Neural
Glioblastoma (TCGA, Cell 2013)	TCGA-12-1597	Glioblastoma Multiforme	G4				4794	non-G-CIMP	METHYLATED	Proneural
Brain Lower Grade Glioma (TCGA, Provisional)	TCGA-DU-6403	Oligoastrocytoma	G3				4825.58
Glioblastoma (TCGA, Cell 2013)	TCGA-06-0178	Glioblastoma Multiforme	G4				4838			Neural
Glioblastoma (TCGA, Cell 2013)	TCGA-12-0618	Glioblastoma Multiforme	G4				5283	non-G-CIMP		Proneural
Glioblastoma (TCGA, Cell 2013)	TCGA-19-5960	Glioblastoma Multiforme	G4				5622	non-G-CIMP	UNMETHYLATED	Proneural
Glioblastoma (TCGA, Cell 2013)	TCGA-06-0686	Glioblastoma Multiforme	G4				5623	non-G-CIMP		Proneural
Brain Lower Grade Glioma (TCGA, Provisional)	TCGA-HT-8011	Anaplastic Astrocytoma	G3				5695.81
Glioblastoma (TCGA, Cell 2013)	TCGA-02-0047	Glioblastoma Multiforme	G4				5769	non-G-CIMP	UNMETHYLATED	Proneural
Glioblastoma (TCGA, Cell 2013)	TCGA-28-1747	Glioblastoma Multiforme	G4				5994	non-G-CIMP	METHYLATED	Classical
Glioblastoma (TCGA, Cell 2013)	TCGA-26-5133	Glioblastoma Multiforme	G4			Missense Mutation (putative driver)	6049	G-CIMP	UNMETHYLATED	G-CIMP
Glioblastoma (TCGA, Cell 2013)	TCGA-76-4931	Glioblastoma Multiforme	G4				6542	non-G-CIMP	UNMETHYLATED	Classical
Glioblastoma (TCGA, Cell 2013)	TCGA-06-0744	Glioblastoma Multiforme	G4			Missense Mutation (putative driver)	6566	non-G-CIMP		Classical
Glioblastoma (TCGA, Cell 2013)	TCGA-06-5415	Glioblastoma Multiforme	G4				7184	non-G-CIMP	UNMETHYLATED	Classical
Glioblastoma (TCGA, Cell 2013)	TCGA-28-5204	Glioblastoma Multiforme	G4				7471	non-G-CIMP	UNMETHYLATED	Neural
Glioblastoma (TCGA, Cell 2013)	TCGA-28-5215	Glioblastoma Multiforme	G4				7504	non-G-CIMP	METHYLATED	Mesenchymal
Glioblastoma (TCGA, Cell 2013)	TCGA-02-2485	Glioblastoma Multiforme	G4			Missense Mutation (putative driver)	7745	non-G-CIMP	UNMETHYLATED	Classical
Glioblastoma (TCGA, Cell 2013)	TCGA-06-0157	Glioblastoma Multiforme	G4				8107	non-G-CIMP		Classical
Glioblastoma (TCGA, Cell 2013)	TCGA-06-0238	Glioblastoma Multiforme	G4			Inframe Mutation (putative driver)	8183	non-G-CIMP		Proneural
Glioblastoma (TCGA, Cell 2013)	TCGA-16-0846	Glioblastoma Multiforme	G4			Missense Mutation (putative driver)	8240	non-G-CIMP	METHYLATED	Proneural
Glioblastoma (TCGA, Cell 2013)	TCGA-06-0174	Glioblastoma Multiforme	G4				8400	non-G-CIMP		Proneural
Glioblastoma (TCGA, Cell 2013)	TCGA-27-2523	Glioblastoma Multiforme	G4				8566	non-G-CIMP	METHYLATED	Classical
Glioblastoma (TCGA, Cell 2013)	TCGA-41-2571	Glioblastoma Multiforme	G4				8570	non-G-CIMP	UNMETHYLATED	Proneural
Glioblastoma (TCGA, Cell 2013)	TCGA-06-2558	Glioblastoma Multiforme	G4			Missense Mutation (putative driver)	8998	non-G-CIMP	UNMETHYLATED	Proneural
Glioblastoma (TCGA, Cell 2013)	TCGA-26-5135	Glioblastoma Multiforme	G4				9374	non-G-CIMP	METHYLATED	Proneural
Glioblastoma (TCGA, Cell 2013)	TCGA-06-0745	Glioblastoma Multiforme	G4				14086	non-G-CIMP		Proneural
Glioblastoma (TCGA, Cell 2013)	TCGA-41-5651	Glioblastoma Multiforme	G4			Truncating mutation (putative driver)	32421	non-G-CIMP	METHYLATED	Proneural

## Sheet: Table S2-DLL3 alterations TCGA
Study ID	Sample ID	Patient ID	Altered	DLL3: AMP HOMDEL MUT FUSION;
gbm_tcga	TCGA-12-0691-01	TCGA-12-0691	1	CNA: AMP;
gbm_tcga_pan_can_atlas_2018	TCGA-12-0691-01	TCGA-12-0691	1	CNA: AMP;
gbm_tcga_pub2013	TCGA-12-0691-01	TCGA-12-0691	1	CNA: AMP;
gbm_tcga	TCGA-12-0778-01	TCGA-12-0778	1	CNA: AMP;
gbm_tcga_pub2013	TCGA-12-0778-01	TCGA-12-0778	1	CNA: AMP;
gbm_tcga	TCGA-19-A6J5-01	TCGA-19-A6J5	1	CNA: AMP;
gbm_tcga_pan_can_atlas_2018	TCGA-19-A6J5-01	TCGA-19-A6J5	1	CNA: AMP;
gbm_tcga	TCGA-26-5133-01	TCGA-26-5133	1	CNA: AMP;
gbm_tcga_pan_can_atlas_2018	TCGA-26-5133-01	TCGA-26-5133	1	CNA: AMP;
gbm_tcga_pub2013	TCGA-26-5133-01	TCGA-26-5133	1	CNA: AMP;
gbm_tcga_pub2013	TCGA-06-2569-01	TCGA-06-2569	1	CNA: HOMDEL;
lgg_tcga_pan_can_atlas_2018	TCGA-DU-6400-01	TCGA-DU-6400	1	FUSION: DLL3-SUPT5H;
gbm_tcga_pan_can_atlas_2018	TCGA-14-0866-01	TCGA-14-0866	1	MUT: Q522L;
mbl_sickkids_2016	MB-REC-13	MB-REC-13	1	MUT: R490H;
lgg_tcga_pan_can_atlas_2018	TCGA-TM-A7CA-01	TCGA-TM-A7CA	1	MUT: R5G;
mbl_icgc	ICGC_MB1	ICGC_MB1	0
mbl_icgc	ICGC_MB12	ICGC_MB12	0
mbl_icgc	ICGC_MB14	ICGC_MB14	0
mbl_icgc	ICGC_MB15	ICGC_MB15	0
mbl_icgc	ICGC_MB16	ICGC_MB16	0
mbl_icgc	ICGC_MB17	ICGC_MB17	0
mbl_icgc	ICGC_MB18	ICGC_MB18	0
mbl_icgc	ICGC_MB19	ICGC_MB19	0
mbl_icgc	ICGC_MB2	ICGC_MB2	0
mbl_icgc	ICGC_MB20	ICGC_MB20	0
mbl_icgc	ICGC_MB21	ICGC_MB21	0
mbl_icgc	ICGC_MB23	ICGC_MB23	0
mbl_icgc	ICGC_MB24	ICGC_MB24	0
mbl_icgc	ICGC_MB26	ICGC_MB26	0
mbl_icgc	ICGC_MB28	ICGC_MB28	0
mbl_icgc	ICGC_MB31	ICGC_MB31	0
mbl_icgc	ICGC_MB32	ICGC_MB32	0
mbl_icgc	ICGC_MB34	ICGC_MB34	0
mbl_icgc	ICGC_MB35	ICGC_MB35	0
mbl_icgc	ICGC_MB36	ICGC_MB36	0
mbl_icgc	ICGC_MB37	ICGC_MB37	0
mbl_icgc	ICGC_MB38	ICGC_MB38	0
mbl_icgc	ICGC_MB39	ICGC_MB39	0
mbl_icgc	ICGC_MB40	ICGC_MB40	0
mbl_icgc	ICGC_MB45	ICGC_MB45	0
mbl_icgc	ICGC_MB46	ICGC_MB46	0
mbl_icgc	ICGC_MB49	ICGC_MB49	0
mbl_icgc	ICGC_MB5	ICGC_MB5	0
mbl_icgc	ICGC_MB50	ICGC_MB50	0
mbl_icgc	ICGC_MB51	ICGC_MB51	0
mbl_icgc	ICGC_MB518	ICGC_MB518	0
mbl_icgc	ICGC_MB6	ICGC_MB6	0
mbl_icgc	ICGC_MB612	ICGC_MB612	0
mbl_icgc	ICGC_MB7	ICGC_MB7	0
mbl_icgc	ICGC_MB800	ICGC_MB800	0
mbl_icgc	ICGC_MB9	ICGC_MB9	0
past_dkfz_heidelberg_2013	ICGC_PA10	ICGC_PA10	0
past_dkfz_heidelberg_2013	ICGC_PA100	ICGC_PA100	0
past_dkfz_heidelberg_2013	ICGC_PA102	ICGC_PA102	0
past_dkfz_heidelberg_2013	ICGC_PA103	ICGC_PA103	0
past_dkfz_heidelberg_2013	ICGC_PA105	ICGC_PA105	0
past_dkfz_heidelberg_2013	ICGC_PA107	ICGC_PA107	0
past_dkfz_heidelberg_2013	ICGC_PA108	ICGC_PA108	0
past_dkfz_heidelberg_2013	ICGC_PA109	ICGC_PA109	0
past_dkfz_heidelberg_2013	ICGC_PA11	ICGC_PA11	0
past_dkfz_heidelberg_2013	ICGC_PA110	ICGC_PA110	0
past_dkfz_heidelberg_2013	ICGC_PA112	ICGC_PA112	0
past_dkfz_heidelberg_2013	ICGC_PA116	ICGC_PA116	0
past_dkfz_heidelberg_2013	ICGC_PA117	ICGC_PA117	0
past_dkfz_heidelberg_2013	ICGC_PA12	ICGC_PA12	0
past_dkfz_heidelberg_2013	ICGC_PA126	ICGC_PA126	0
past_dkfz_heidelberg_2013	ICGC_PA129	ICGC_PA129	0
past_dkfz_heidelberg_2013	ICGC_PA131	ICGC_PA131	0
past_dkfz_heidelberg_2013	ICGC_PA134	ICGC_PA134	0
past_dkfz_heidelberg_2013	ICGC_PA135	ICGC_PA135	0
past_dkfz_heidelberg_2013	ICGC_PA136	ICGC_PA136	0
past_dkfz_heidelberg_2013	ICGC_PA138	ICGC_PA138	0
past_dkfz_heidelberg_2013	ICGC_PA14	ICGC_PA14	0
past_dkfz_heidelberg_2013	ICGC_PA140	ICGC_PA140	0
past_dkfz_heidelberg_2013	ICGC_PA142	ICGC_PA142	0
past_dkfz_heidelberg_2013	ICGC_PA143	ICGC_PA143	0
past_dkfz_heidelberg_2013	ICGC_PA144	ICGC_PA144	0
past_dkfz_heidelberg_2013	ICGC_PA145	ICGC_PA145	0
past_dkfz_heidelberg_2013	ICGC_PA147	ICGC_PA147	0
past_dkfz_heidelberg_2013	ICGC_PA148	ICGC_PA148	0
past_dkfz_heidelberg_2013	ICGC_PA150	ICGC_PA150	0
past_dkfz_heidelberg_2013	ICGC_PA157	ICGC_PA157	0
past_dkfz_heidelberg_2013	ICGC_PA158	ICGC_PA158	0
past_dkfz_heidelberg_2013	ICGC_PA159	ICGC_PA159	0
past_dkfz_heidelberg_2013	ICGC_PA161	ICGC_PA161	0
past_dkfz_heidelberg_2013	ICGC_PA162	ICGC_PA162	0
past_dkfz_heidelberg_2013	ICGC_PA163	ICGC_PA163	0
past_dkfz_heidelberg_2013	ICGC_PA165	ICGC_PA165	0
past_dkfz_heidelberg_2013	ICGC_PA166	ICGC_PA166	0
past_dkfz_heidelberg_2013	ICGC_PA17	ICGC_PA17	0
past_dkfz_heidelberg_2013	ICGC_PA20	ICGC_PA20	0
past_dkfz_heidelberg_2013	ICGC_PA21	ICGC_PA21	0
past_dkfz_heidelberg_2013	ICGC_PA22	ICGC_PA22	0
past_dkfz_heidelberg_2013	ICGC_PA24	ICGC_PA24	0
past_dkfz_heidelberg_2013	ICGC_PA25	ICGC_PA25	0
past_dkfz_heidelberg_2013	ICGC_PA27	ICGC_PA27	0
past_dkfz_heidelberg_2013	ICGC_PA28	ICGC_PA28	0
past_dkfz_heidelberg_2013	ICGC_PA29	ICGC_PA29	0
past_dkfz_heidelberg_2013	ICGC_PA3	ICGC_PA3	0
past_dkfz_heidelberg_2013	ICGC_PA30	ICGC_PA30	0
past_dkfz_heidelberg_2013	ICGC_PA33	ICGC_PA33	0
past_dkfz_heidelberg_2013	ICGC_PA34	ICGC_PA34	0
past_dkfz_heidelberg_2013	ICGC_PA36	ICGC_PA36	0
past_dkfz_heidelberg_2013	ICGC_PA37	ICGC_PA37	0
past_dkfz_heidelberg_2013	ICGC_PA39	ICGC_PA39	0
past_dkfz_heidelberg_2013	ICGC_PA4	ICGC_PA4	0
past_dkfz_heidelberg_2013	ICGC_PA41	ICGC_PA41	0
past_dkfz_heidelberg_2013	ICGC_PA42	ICGC_PA42	0
past_dkfz_heidelberg_2013	ICGC_PA43	ICGC_PA43	0
past_dkfz_heidelberg_2013	ICGC_PA46	ICGC_PA46	0
past_dkfz_heidelberg_2013	ICGC_PA48	ICGC_PA48	0
past_dkfz_heidelberg_2013	ICGC_PA5	ICGC_PA5	0
past_dkfz_heidelberg_2013	ICGC_PA50	ICGC_PA50	0
past_dkfz_heidelberg_2013	ICGC_PA53	ICGC_PA53	0
past_dkfz_heidelberg_2013	ICGC_PA55	ICGC_PA55	0
past_dkfz_heidelberg_2013	ICGC_PA56	ICGC_PA56	0
past_dkfz_heidelberg_2013	ICGC_PA58	ICGC_PA58	0
past_dkfz_heidelberg_2013	ICGC_PA59	ICGC_PA59	0
past_dkfz_heidelberg_2013	ICGC_PA62	ICGC_PA62	0
past_dkfz_heidelberg_2013	ICGC_PA63	ICGC_PA63	0
past_dkfz_heidelberg_2013	ICGC_PA64	ICGC_PA64	0
past_dkfz_heidelberg_2013	ICGC_PA65	ICGC_PA65	0
past_dkfz_heidelberg_2013	ICGC_PA69	ICGC_PA69	0
past_dkfz_heidelberg_2013	ICGC_PA70	ICGC_PA70	0
past_dkfz_heidelberg_2013	ICGC_PA71	ICGC_PA71	0
past_dkfz_heidelberg_2013	ICGC_PA73	ICGC_PA73	0
past_dkfz_heidelberg_2013	ICGC_PA75	ICGC_PA75	0
past_dkfz_heidelberg_2013	ICGC_PA79	ICGC_PA79	0
past_dkfz_heidelberg_2013	ICGC_PA8	ICGC_PA8	0
past_dkfz_heidelberg_2013	ICGC_PA81	ICGC_PA81	0
past_dkfz_heidelberg_2013	ICGC_PA82	ICGC_PA82	0
past_dkfz_heidelberg_2013	ICGC_PA83	ICGC_PA83	0
past_dkfz_heidelberg_2013	ICGC_PA84	ICGC_PA84	0
past_dkfz_heidelberg_2013	ICGC_PA85	ICGC_PA85	0
past_dkfz_heidelberg_2013	ICGC_PA86	ICGC_PA86	0
past_dkfz_heidelberg_2013	ICGC_PA87	ICGC_PA87	0
past_dkfz_heidelberg_2013	ICGC_PA88	ICGC_PA88	0
past_dkfz_heidelberg_2013	ICGC_PA89	ICGC_PA89	0
past_dkfz_heidelberg_2013	ICGC_PA9	ICGC_PA9	0
past_dkfz_heidelberg_2013	ICGC_PA91	ICGC_PA91	0
past_dkfz_heidelberg_2013	ICGC_PA92	ICGC_PA92	0
past_dkfz_heidelberg_2013	ICGC_PA93	ICGC_PA93	0
past_dkfz_heidelberg_2013	ICGC_PA94	ICGC_PA94	0
past_dkfz_heidelberg_2013	ICGC_PA95	ICGC_PA95	0
past_dkfz_heidelberg_2013	ICGC_PA96	ICGC_PA96	0
past_dkfz_heidelberg_2013	ICGC_PA97	ICGC_PA97	0
past_dkfz_heidelberg_2013	ICGC_PA99	ICGC_PA99	0
mbl_icgc	LFS_MB1	LFS_MB1	0
mbl_icgc	LFS_MB2	LFS_MB2	0
mbl_icgc	LFS_MB3	LFS_MB3	0
mbl_icgc	LFS_MB4	LFS_MB4	0
mbl_icgc	MB_Exm10	MB_Exm10	0
mbl_icgc	MB_Exm1001	MB_Exm1001	0
mbl_icgc	MB_Exm1017	MB_Exm1017	0
mbl_icgc	MB_Exm17	MB_Exm17	0
mbl_icgc	MB_Exm23	MB_Exm23	0
mbl_icgc	MB_Exm246	MB_Exm246	0
mbl_icgc	MB_Exm250	MB_Exm250	0
mbl_icgc	MB_Exm516	MB_Exm516	0
mbl_icgc	MB_Exm528	MB_Exm528	0
mbl_icgc	MB_Exm557	MB_Exm557	0
mbl_icgc	MB_Exm564	MB_Exm564	0
mbl_icgc	MB_Exm575	MB_Exm575	0
mbl_icgc	MB_Exm599	MB_Exm599	0
mbl_icgc	MB_Exm645	MB_Exm645	0
mbl_icgc	MB_Exm667	MB_Exm667	0
mbl_icgc	MB_Exm702	MB_Exm702	0
mbl_icgc	MB_Exm704	MB_Exm704	0
mbl_icgc	MB_Exm879	MB_Exm879	0
mbl_icgc	MB_Exm987	MB_Exm987	0
mbl_icgc	MB_Exm999	MB_Exm999	0
mbl_sickkids_2016	MB-REC-01	MB-REC-01	0
mbl_sickkids_2016	MB-REC-02	MB-REC-02	0
mbl_sickkids_2016	MB-REC-03	MB-REC-03	0
mbl_sickkids_2016	MB-REC-04	MB-REC-04	0
mbl_sickkids_2016	MB-REC-05	MB-REC-05	0
mbl_sickkids_2016	MB-REC-06	MB-REC-06	0
mbl_sickkids_2016	MB-REC-07	MB-REC-07	0
mbl_sickkids_2016	MB-REC-08	MB-REC-08	0
mbl_sickkids_2016	MB-REC-09	MB-REC-09	0
mbl_sickkids_2016	MB-REC-10	MB-REC-10	0
mbl_sickkids_2016	MB-REC-11	MB-REC-11	0
mbl_sickkids_2016	MB-REC-12	MB-REC-12	0
mbl_sickkids_2016	MB-REC-14	MB-REC-14	0
mbl_sickkids_2016	MB-REC-15	MB-REC-15	0
mbl_sickkids_2016	MB-REC-16	MB-REC-16	0
mbl_sickkids_2016	MB-REC-17	MB-REC-17	0
mbl_sickkids_2016	MB-REC-18	MB-REC-18	0
mbl_sickkids_2016	MB-REC-19	MB-REC-19	0
mbl_sickkids_2016	MB-REC-20	MB-REC-20	0
mbl_sickkids_2016	MB-REC-21	MB-REC-21	0
mbl_sickkids_2016	MB-REC-22	MB-REC-22	0
mbl_sickkids_2016	MB-REC-23	MB-REC-23	0
mbl_sickkids_2016	MB-REC-24	MB-REC-24	0
mbl_sickkids_2016	MB-REC-26	MB-REC-26	0
mbl_sickkids_2016	MB-REC-27	MB-REC-27	0
mbl_sickkids_2016	MB-REC-28	MB-REC-28	0
mbl_sickkids_2016	MB-REC-29	MB-REC-29	0
mbl_sickkids_2016	MB-REC-30	MB-REC-30	0
mbl_sickkids_2016	MB-REC-31	MB-REC-31	0
mbl_sickkids_2016	MB-REC-32	MB-REC-32	0
mbl_sickkids_2016	MB-REC-33	MB-REC-33	0
mbl_sickkids_2016	MB-REC-34	MB-REC-34	0
mbl_sickkids_2016	MB-REC-35	MB-REC-35	0
mbl_sickkids_2016	MB-REC-36	MB-REC-36	0
mbl_sickkids_2016	MB-REC-37	MB-REC-37	0
mbl_sickkids_2016	MB-REC-38	MB-REC-38	0
mbl_sickkids_2016	MB-REC-39	MB-REC-39	0
mbl_sickkids_2016	MB-REC-40	MB-REC-40	0
mbl_sickkids_2016	MB-REC-41	MB-REC-41	0
mbl_sickkids_2016	MB-REC-42	MB-REC-42	0
mbl_sickkids_2016	MB-REC-43	MB-REC-43	0
mbl_sickkids_2016	MB-REC-44	MB-REC-44	0
mbl_sickkids_2016	MB-REC-45	MB-REC-45	0
mbl_sickkids_2016	MB-REC-46	MB-REC-46	0
mbl_sickkids_2016	MB-REC-47	MB-REC-47	0
mbl_icgc	MBRep_T1	MBRep_T1	0
mbl_icgc	MBRep_T10	MBRep_T10	0
mbl_icgc	MBRep_T11	MBRep_T11	0
mbl_icgc	MBRep_T12	MBRep_T12	0
mbl_icgc	MBRep_T13	MBRep_T13	0
mbl_icgc	MBRep_T2	MBRep_T2	0
mbl_icgc	MBRep_T22	MBRep_T22	0
mbl_icgc	MBRep_T23	MBRep_T23	0
mbl_icgc	MBRep_T24	MBRep_T24	0
mbl_icgc	MBRep_T25	MBRep_T25	0
mbl_icgc	MBRep_T26	MBRep_T26	0
mbl_icgc	MBRep_T27	MBRep_T27	0
mbl_icgc	MBRep_T28	MBRep_T28	0
mbl_icgc	MBRep_T29	MBRep_T29	0
mbl_icgc	MBRep_T3	MBRep_T3	0
mbl_icgc	MBRep_T30	MBRep_T30	0
mbl_icgc	MBRep_T32	MBRep_T32	0
mbl_icgc	MBRep_T33	MBRep_T33	0
mbl_icgc	MBRep_T35	MBRep_T35	0
mbl_icgc	MBRep_T36	MBRep_T36	0
mbl_icgc	MBRep_T37	MBRep_T37	0
mbl_icgc	MBRep_T38	MBRep_T38	0
mbl_icgc	MBRep_T39	MBRep_T39	0
mbl_icgc	MBRep_T4	MBRep_T4	0
mbl_icgc	MBRep_T40	MBRep_T40	0
mbl_icgc	MBRep_T41	MBRep_T41	0
mbl_icgc	MBRep_T43	MBRep_T43	0
mbl_icgc	MBRep_T45	MBRep_T45	0
mbl_icgc	MBRep_T46	MBRep_T46	0
mbl_icgc	MBRep_T47	MBRep_T47	0
mbl_icgc	MBRep_T48	MBRep_T48	0
mbl_icgc	MBRep_T49	MBRep_T49	0
mbl_icgc	MBRep_T5	MBRep_T5	0
mbl_icgc	MBRep_T51	MBRep_T51	0
mbl_icgc	MBRep_T53	MBRep_T53	0
mbl_icgc	MBRep_T54	MBRep_T54	0
mbl_icgc	MBRep_T56	MBRep_T56	0
mbl_icgc	MBRep_T59	MBRep_T59	0
mbl_icgc	MBRep_T6	MBRep_T6	0
mbl_icgc	MBRep_T60	MBRep_T60	0
mbl_icgc	MBRep_T61	MBRep_T61	0
mbl_icgc	MBRep_T62	MBRep_T62	0
mbl_icgc	MBRep_T63	MBRep_T63	0
mbl_icgc	MBRep_T64	MBRep_T64	0
mbl_icgc	MBRep_T66	MBRep_T66	0
mbl_icgc	MBRep_T67	MBRep_T67	0
mbl_icgc	MBRep_T68	MBRep_T68	0
mbl_icgc	MBRep_T69	MBRep_T69	0
mbl_icgc	MBRep_T70	MBRep_T70	0
mbl_icgc	MBRep_T71	MBRep_T71	0
mbl_icgc	MBRep_T72	MBRep_T72	0
mbl_icgc	MBRep_T73	MBRep_T73	0
mbl_icgc	MBRep_T78	MBRep_T78	0
mbl_icgc	MBRep_T79	MBRep_T79	0
mbl_icgc	MBRep_T83	MBRep_T83	0
mbl_icgc	MBRep_T85	MBRep_T85	0
mbl_icgc	MBRep_T86	MBRep_T86	0
mbl_icgc	MBRep_T87	MBRep_T87	0
mbl_icgc	MBRep_T88	MBRep_T88	0
mbl_icgc	MBRep_T89	MBRep_T89	0
mbl_icgc	MBRep_T90	MBRep_T90	0
mbl_icgc	MBRep_T91	MBRep_T91	0
mbl_icgc	MBRep_T92	MBRep_T92	0
mbl_icgc	MBRep_T93	MBRep_T93	0
mbl_icgc	MBRep_T94	MBRep_T94	0
mbl_broad_2012	MD-021	MD-021	0
mbl_broad_2012	MD-022	MD-022	0
mbl_broad_2012	MD-023	MD-023	0
mbl_broad_2012	MD-026	MD-026	0
mbl_broad_2012	MD-028	MD-028	0
mbl_broad_2012	MD-034	MD-034	0
mbl_broad_2012	MD-035	MD-035	0
mbl_broad_2012	MD-042	MD-042	0
mbl_broad_2012	MD-045	MD-045	0
mbl_broad_2012	MD-047	MD-047	0
mbl_broad_2012	MD-050	MD-050	0
mbl_broad_2012	MD-051	MD-051	0
mbl_broad_2012	MD-053	MD-053	0
mbl_broad_2012	MD-054	MD-054	0
mbl_broad_2012	MD-057	MD-057	0
mbl_broad_2012	MD-074	MD-074	0
mbl_broad_2012	MD-076	MD-076	0
mbl_broad_2012	MD-085	MD-085	0
mbl_broad_2012	MD-088	MD-088	0
mbl_broad_2012	MD-090	MD-090	0
mbl_broad_2012	MD-093	MD-093	0
mbl_broad_2012	MD-095	MD-095	0
mbl_broad_2012	MD-097	MD-097	0
mbl_broad_2012	MD-121	MD-121	0
mbl_broad_2012	MD-127	MD-127	0
mbl_broad_2012	MD-133	MD-133	0
mbl_broad_2012	MD-141	MD-141	0
mbl_broad_2012	MD-142	MD-142	0
mbl_broad_2012	MD-143	MD-143	0
mbl_broad_2012	MD-144	MD-144	0
mbl_broad_2012	MD-146	MD-146	0
mbl_broad_2012	MD-204	MD-204	0
mbl_broad_2012	MD-206	MD-206	0
mbl_broad_2012	MD-207	MD-207	0
mbl_broad_2012	MD-208	MD-208	0
mbl_broad_2012	MD-212	MD-212	0
mbl_broad_2012	MD-220	MD-220	0
mbl_broad_2012	MD-237	MD-237	0
mbl_broad_2012	MD-241	MD-241	0
mbl_broad_2012	MD-243	MD-243	0
mbl_broad_2012	MD-253	MD-253	0
mbl_broad_2012	MD-274	MD-274	0
mbl_broad_2012	MD-275	MD-275	0
mbl_broad_2012	MD-276	MD-276	0
mbl_broad_2012	MD-277	MD-277	0
mbl_broad_2012	MD-278	MD-278	0
mbl_broad_2012	MD-279	MD-279	0
mbl_broad_2012	MD-280	MD-280	0
mbl_broad_2012	MD-281	MD-281	0
mbl_broad_2012	MD-282	MD-282	0
mbl_broad_2012	MD-283	MD-283	0
mbl_broad_2012	MD-284	MD-284	0
mbl_broad_2012	MD-285	MD-285	0
mbl_broad_2012	MD-286	MD-286	0
mbl_broad_2012	MD-287	MD-287	0
mbl_broad_2012	MD-288	MD-288	0
mbl_broad_2012	MD-289	MD-289	0
mbl_broad_2012	MD-290	MD-290	0
mbl_broad_2012	MD-292	MD-292	0
mbl_broad_2012	MD-293	MD-293	0
mbl_broad_2012	MD-294	MD-294	0
mbl_broad_2012	MD-295	MD-295	0
mbl_broad_2012	MD-296	MD-296	0
mbl_broad_2012	MD-304	MD-304	0
mbl_broad_2012	MD-305	MD-305	0
mbl_broad_2012	MD-306	MD-306	0
mbl_broad_2012	MD-317	MD-317	0
mbl_broad_2012	MD-318	MD-318	0
mbl_broad_2012	MD-319	MD-319	0
mbl_broad_2012	MD-320	MD-320	0
mbl_broad_2012	MD-321	MD-321	0
mbl_broad_2012	MD-322	MD-322	0
mbl_broad_2012	MD-323	MD-323	0
mbl_broad_2012	MD-324	MD-324	0
mbl_broad_2012	MD-325	MD-325	0
mbl_broad_2012	MD-326	MD-326	0
mbl_broad_2012	MD-328	MD-328	0
mbl_broad_2012	MD-329	MD-329	0
mbl_broad_2012	MD-330	MD-330	0
mbl_broad_2012	MD-331	MD-331	0
mbl_broad_2012	MD-332	MD-332	0
mbl_broad_2012	MD-333	MD-333	0
mbl_broad_2012	MD-334	MD-334	0
mbl_broad_2012	MD-335	MD-335	0
mbl_broad_2012	MD-336	MD-336	0
mbl_broad_2012	MD-337	MD-337	0
mbl_broad_2012	MD-338	MD-338	0
mbl_broad_2012	MD-339	MD-339	0
mbl_broad_2012	MD-340	MD-340	0
mbl_broad_2012	MD-341	MD-341	0
mbl_broad_2012	MD-342	MD-342	0
mbl_broad_2012	MD-343	MD-343	0
odg_msk_2017	P-0000896-T01-IM3	P-0000896	0
odg_msk_2017	P-0001412-T01-IM3	P-0001412	0
odg_msk_2017	P-0001420-T01-IM3	P-0001420	0
odg_msk_2017	P-0001420-T02-IM5	P-0001420	0
odg_msk_2017	P-0002224-T01-IM3	P-0002224	0
odg_msk_2017	P-0004578-T01-IM5	P-0004578	0
odg_msk_2017	P-0004812-T01-IM5	P-0004812	0
odg_msk_2017	P-0004812-T02-IM6	P-0004812	0
odg_msk_2017	P-0005939-T01-IM5	P-0005939	0
odg_msk_2017	P-0008244-T01-IM5	P-0008244	0
odg_msk_2017	P-0008244-T02-IM5	P-0008244	0
lgg_ucsf_2014	P01_Pri	P01	0
lgg_ucsf_2014	P01_Rec	P01	0
lgg_ucsf_2014	P02_Pri	P02	0
lgg_ucsf_2014	P02_Rec	P02	0
lgg_ucsf_2014	P04_Pri	P04	0
lgg_ucsf_2014	P04_Rec1	P04	0
lgg_ucsf_2014	P04_Rec2	P04	0
lgg_ucsf_2014	P04_Rec3	P04	0
lgg_ucsf_2014	P05_Pri	P05	0
lgg_ucsf_2014	P05_Rec	P05	0
lgg_ucsf_2014	P06_Pri	P06	0
lgg_ucsf_2014	P06_Rec	P06	0
lgg_ucsf_2014	P07_Pri	P07	0
lgg_ucsf_2014	P07_Rec	P07	0
lgg_ucsf_2014	P08_Pri	P08	0
lgg_ucsf_2014	P08_Rec	P08	0
lgg_ucsf_2014	P09_Pri	P09	0
lgg_ucsf_2014	P09_Rec	P09	0
lgg_ucsf_2014	P10_Pri	P10	0
lgg_ucsf_2014	P10_Rec	P10	0
lgg_ucsf_2014	P11_Pri	P11	0
lgg_ucsf_2014	P11_Rec	P11	0
lgg_ucsf_2014	P12_Pri	P12	0
lgg_ucsf_2014	P12_Rec	P12	0
lgg_ucsf_2014	P13_Pri	P13	0
lgg_ucsf_2014	P13_Rec	P13	0
lgg_ucsf_2014	P15_Pri	P15	0
lgg_ucsf_2014	P15_Rec	P15	0
lgg_ucsf_2014	P16_Pri	P16	0
lgg_ucsf_2014	P16_Rec	P16	0
lgg_ucsf_2014	P17_Pri_A	P17	0
lgg_ucsf_2014	P17_Pri_B	P17	0
lgg_ucsf_2014	P17_Pri_C	P17	0
lgg_ucsf_2014	P17_Rec1_A	P17	0
lgg_ucsf_2014	P17_Rec1_B	P17	0
lgg_ucsf_2014	P17_Rec1_C	P17	0
lgg_ucsf_2014	P17_Rec1_D	P17	0
lgg_ucsf_2014	P18_Pri_A	P18	0
lgg_ucsf_2014	P18_Pri_B	P18	0
lgg_ucsf_2014	P18_Pri_C	P18	0
lgg_ucsf_2014	P18_Pri_D	P18	0
lgg_ucsf_2014	P18_Rec	P18	0
lgg_ucsf_2014	P21_Pri	P21	0
lgg_ucsf_2014	P21_Rec	P21	0
lgg_ucsf_2014	P24_Pri	P24	0
lgg_ucsf_2014	P24_Rec1	P24	0
lgg_ucsf_2014	P24_Rec2	P24	0
lgg_ucsf_2014	P25_Pri	P25	0
lgg_ucsf_2014	P25_Rec	P25	0
lgg_ucsf_2014	P26_Pri_A	P26	0
lgg_ucsf_2014	P26_Pri_B	P26	0
lgg_ucsf_2014	P26_Rec1_A	P26	0
lgg_ucsf_2014	P26_Rec1_B	P26	0
lgg_ucsf_2014	P27_Pri_A	P27	0
lgg_ucsf_2014	P27_Pri_B	P27	0
lgg_ucsf_2014	P27_Rec1_A	P27	0
lgg_ucsf_2014	P27_Rec1_B	P27	0
lgg_ucsf_2014	P28_Pri	P28	0
lgg_ucsf_2014	P28_Rec	P28	0
lgg_ucsf_2014	P29_Pri	P29	0
lgg_ucsf_2014	P29_Rec	P29	0
odg_msk_2017	s_AO_odg_001_T	p_AO_odg_001	0
odg_msk_2017	s_AO_odg_002_T	p_AO_odg_002	0
odg_msk_2017	s_AO_odg_003_T	p_AO_odg_003	0
odg_msk_2017	s_AO_odg_004_T	p_AO_odg_004	0
odg_msk_2017	s_AO_odg_005_T	p_AO_odg_005	0
odg_msk_2017	s_AO_odg_006_T	p_AO_odg_006	0
odg_msk_2017	s_AO_odg_007_T	p_AO_odg_007	0
odg_msk_2017	s_AO_odg_008_T	p_AO_odg_008	0
odg_msk_2017	s_AO_odg_009_T	p_AO_odg_009	0
odg_msk_2017	s_AO_odg_010_T	p_AO_odg_010	0
odg_msk_2017	s_AO_odg_011_T	p_AO_odg_011	0
mbl_pcgp	SJMB001	WNT-07	0
mbl_pcgp	SJMB002	WNT-11	0
mbl_pcgp	SJMB003	SHH-04	0
mbl_pcgp	SJMB004	SHH-09	0
mbl_pcgp	SJMB006	G3-14	0
mbl_pcgp	SJMB008	G3-16	0
mbl_pcgp	SJMB009	G4-20	0
mbl_pcgp	SJMB010	G4-11	0
mbl_pcgp	SJMB011	G4-21	0
mbl_pcgp	SJMB012	SHH-03	0
mbl_pcgp	SJMB013	SHH-05	0
mbl_pcgp	SJMB014	G4-23	0
mbl_pcgp	SJMB015	G4-36	0
mbl_pcgp	SJMB016	G4-06	0
mbl_pcgp	SJMB017	G3-02	0
mbl_pcgp	SJMB018	G4-26	0
mbl_pcgp	SJMB019	G4-07	0
mbl_pcgp	SJMB020	G4-10	0
mbl_pcgp	SJMB023	G4-12	0
mbl_pcgp	SJMB024	G4-35	0
mbl_pcgp	SJMB025	G3-03	0
mbl_pcgp	SJMB026	U-01	0
mbl_pcgp	SJMB027	G4-04	0
mbl_pcgp	SJMB028	WNT-08	0
mbl_pcgp	SJMB029	U-02	0
mbl_pcgp	SJMB030	G3-04	0
mbl_pcgp	SJMB031	G3-13	0
mbl_pcgp	SJMB032	G4-05	0
mbl_pcgp	SJMB033	SHH-12	0
mbl_pcgp	SJMB034	G4-09	0
mbl_pcgp	SJMB035	G4-13	0
mbl_pcgp	SJMB036	G4-29	0
mbl_pcgp	SJMB037	G4-32	0
mbl_pcgp	SJMB038	G4-03	0
mbl_pcgp	SJMB039	G4-08	0
mbl_pcgp	SJMB040	WNT-09	0
mbl_pcgp	SJMB041	WNT-02	0
gbm_tcga	TCGA-02-0001-01	TCGA-02-0001	0
gbm_tcga_pan_can_atlas_2018	TCGA-02-0001-01	TCGA-02-0001	0
gbm_tcga_pub	TCGA-02-0001-01	TCGA-02-0001	0
gbm_tcga_pub2013	TCGA-02-0001-01	TCGA-02-0001	0
lgggbm_tcga_pub	TCGA-02-0001-01	TCGA-02-0001	0
gbm_tcga	TCGA-02-0003-01	TCGA-02-0003	0
gbm_tcga_pan_can_atlas_2018	TCGA-02-0003-01	TCGA-02-0003	0
gbm_tcga_pub	TCGA-02-0003-01	TCGA-02-0003	0
gbm_tcga_pub2013	TCGA-02-0003-01	TCGA-02-0003	0
lgggbm_tcga_pub	TCGA-02-0003-01	TCGA-02-0003	0
gbm_tcga	TCGA-02-0004-01	TCGA-02-0004	0
gbm_tcga_pub	TCGA-02-0004-01	TCGA-02-0004	0
gbm_tcga_pub2013	TCGA-02-0004-01	TCGA-02-0004	0
lgggbm_tcga_pub	TCGA-02-0004-01	TCGA-02-0004	0
gbm_tcga	TCGA-02-0006-01	TCGA-02-0006	0
gbm_tcga_pan_can_atlas_2018	TCGA-02-0006-01	TCGA-02-0006	0
gbm_tcga_pub	TCGA-02-0006-01	TCGA-02-0006	0
gbm_tcga_pub2013	TCGA-02-0006-01	TCGA-02-0006	0
lgggbm_tcga_pub	TCGA-02-0006-01	TCGA-02-0006	0
gbm_tcga	TCGA-02-0007-01	TCGA-02-0007	0
gbm_tcga_pan_can_atlas_2018	TCGA-02-0007-01	TCGA-02-0007	0
gbm_tcga_pub	TCGA-02-0007-01	TCGA-02-0007	0
gbm_tcga_pub2013	TCGA-02-0007-01	TCGA-02-0007	0
lgggbm_tcga_pub	TCGA-02-0007-01	TCGA-02-0007	0
gbm_tcga	TCGA-02-0009-01	TCGA-02-0009	0
gbm_tcga_pan_can_atlas_2018	TCGA-02-0009-01	TCGA-02-0009	0
gbm_tcga_pub	TCGA-02-0009-01	TCGA-02-0009	0
gbm_tcga_pub2013	TCGA-02-0009-01	TCGA-02-0009	0
lgggbm_tcga_pub	TCGA-02-0009-01	TCGA-02-0009	0
gbm_tcga	TCGA-02-0010-01	TCGA-02-0010	0
gbm_tcga_pan_can_atlas_2018	TCGA-02-0010-01	TCGA-02-0010	0
gbm_tcga_pub	TCGA-02-0010-01	TCGA-02-0010	0
gbm_tcga_pub2013	TCGA-02-0010-01	TCGA-02-0010	0
lgggbm_tcga_pub	TCGA-02-0010-01	TCGA-02-0010	0
gbm_tcga	TCGA-02-0011-01	TCGA-02-0011	0
gbm_tcga_pan_can_atlas_2018	TCGA-02-0011-01	TCGA-02-0011	0
gbm_tcga_pub	TCGA-02-0011-01	TCGA-02-0011	0
gbm_tcga_pub2013	TCGA-02-0011-01	TCGA-02-0011	0
lgggbm_tcga_pub	TCGA-02-0011-01	TCGA-02-0011	0
gbm_tcga	TCGA-02-0014-01	TCGA-02-0014	0
gbm_tcga_pan_can_atlas_2018	TCGA-02-0014-01	TCGA-02-0014	0
gbm_tcga_pub	TCGA-02-0014-01	TCGA-02-0014	0
gbm_tcga_pub2013	TCGA-02-0014-01	TCGA-02-0014	0
lgggbm_tcga_pub	TCGA-02-0014-01	TCGA-02-0014	0
gbm_tcga	TCGA-02-0015-01	TCGA-02-0015	0
gbm_tcga_pan_can_atlas_2018	TCGA-02-0015-01	TCGA-02-0015	0
gbm_tcga_pub	TCGA-02-0015-01	TCGA-02-0015	0
gbm_tcga_pub2013	TCGA-02-0015-01	TCGA-02-0015	0
lgggbm_tcga_pub	TCGA-02-0015-01	TCGA-02-0015	0
gbm_tcga	TCGA-02-0016-01	TCGA-02-0016	0
gbm_tcga_pan_can_atlas_2018	TCGA-02-0016-01	TCGA-02-0016	0
gbm_tcga_pub	TCGA-02-0016-01	TCGA-02-0016	0
gbm_tcga_pub2013	TCGA-02-0016-01	TCGA-02-0016	0
lgggbm_tcga_pub	TCGA-02-0016-01	TCGA-02-0016	0
gbm_tcga	TCGA-02-0021-01	TCGA-02-0021	0
gbm_tcga_pan_can_atlas_2018	TCGA-02-0021-01	TCGA-02-0021	0
gbm_tcga_pub	TCGA-02-0021-01	TCGA-02-0021	0
gbm_tcga_pub2013	TCGA-02-0021-01	TCGA-02-0021	0
lgggbm_tcga_pub	TCGA-02-0021-01	TCGA-02-0021	0
gbm_tcga	TCGA-02-0023-01	TCGA-02-0023	0
gbm_tcga_pan_can_atlas_2018	TCGA-02-0023-01	TCGA-02-0023	0
gbm_tcga_pub	TCGA-02-0023-01	TCGA-02-0023	0
gbm_tcga_pub2013	TCGA-02-0023-01	TCGA-02-0023	0
lgggbm_tcga_pub	TCGA-02-0023-01	TCGA-02-0023	0
gbm_tcga	TCGA-02-0024-01	TCGA-02-0024	0
gbm_tcga_pan_can_atlas_2018	TCGA-02-0024-01	TCGA-02-0024	0
gbm_tcga_pub	TCGA-02-0024-01	TCGA-02-0024	0
gbm_tcga_pub2013	TCGA-02-0024-01	TCGA-02-0024	0
lgggbm_tcga_pub	TCGA-02-0024-01	TCGA-02-0024	0
gbm_tcga	TCGA-02-0025-01	TCGA-02-0025	0
gbm_tcga_pan_can_atlas_2018	TCGA-02-0025-01	TCGA-02-0025	0
gbm_tcga_pub	TCGA-02-0025-01	TCGA-02-0025	0
gbm_tcga_pub2013	TCGA-02-0025-01	TCGA-02-0025	0
lgggbm_tcga_pub	TCGA-02-0025-01	TCGA-02-0025	0
gbm_tcga	TCGA-02-0026-01	TCGA-02-0026	0
gbm_tcga_pan_can_atlas_2018	TCGA-02-0026-01	TCGA-02-0026	0
gbm_tcga_pub	TCGA-02-0026-01	TCGA-02-0026	0
gbm_tcga_pub2013	TCGA-02-0026-01	TCGA-02-0026	0
lgggbm_tcga_pub	TCGA-02-0026-01	TCGA-02-0026	0
gbm_tcga	TCGA-02-0027-01	TCGA-02-0027	0
gbm_tcga_pan_can_atlas_2018	TCGA-02-0027-01	TCGA-02-0027	0
gbm_tcga_pub	TCGA-02-0027-01	TCGA-02-0027	0
gbm_tcga_pub2013	TCGA-02-0027-01	TCGA-02-0027	0
lgggbm_tcga_pub	TCGA-02-0027-01	TCGA-02-0027	0
gbm_tcga	TCGA-02-0028-01	TCGA-02-0028	0
gbm_tcga_pan_can_atlas_2018	TCGA-02-0028-01	TCGA-02-0028	0
gbm_tcga_pub	TCGA-02-0028-01	TCGA-02-0028	0
gbm_tcga_pub2013	TCGA-02-0028-01	TCGA-02-0028	0
lgggbm_tcga_pub	TCGA-02-0028-01	TCGA-02-0028	0
gbm_tcga	TCGA-02-0033-01	TCGA-02-0033	0
gbm_tcga_pan_can_atlas_2018	TCGA-02-0033-01	TCGA-02-0033	0
gbm_tcga_pub	TCGA-02-0033-01	TCGA-02-0033	0
gbm_tcga_pub2013	TCGA-02-0033-01	TCGA-02-0033	0
lgggbm_tcga_pub	TCGA-02-0033-01	TCGA-02-0033	0
gbm_tcga	TCGA-02-0034-01	TCGA-02-0034	0
gbm_tcga_pan_can_atlas_2018	TCGA-02-0034-01	TCGA-02-0034	0
gbm_tcga_pub	TCGA-02-0034-01	TCGA-02-0034	0
gbm_tcga_pub2013	TCGA-02-0034-01	TCGA-02-0034	0
lgggbm_tcga_pub	TCGA-02-0034-01	TCGA-02-0034	0
gbm_tcga	TCGA-02-0037-01	TCGA-02-0037	0
gbm_tcga_pan_can_atlas_2018	TCGA-02-0037-01	TCGA-02-0037	0
gbm_tcga_pub	TCGA-02-0037-01	TCGA-02-0037	0
gbm_tcga_pub2013	TCGA-02-0037-01	TCGA-02-0037	0
lgggbm_tcga_pub	TCGA-02-0037-01	TCGA-02-0037	0
gbm_tcga	TCGA-02-0038-01	TCGA-02-0038	0
gbm_tcga_pan_can_atlas_2018	TCGA-02-0038-01	TCGA-02-0038	0
gbm_tcga_pub	TCGA-02-0038-01	TCGA-02-0038	0
gbm_tcga_pub2013	TCGA-02-0038-01	TCGA-02-0038	0
lgggbm_tcga_pub	TCGA-02-0038-01	TCGA-02-0038	0
gbm_tcga	TCGA-02-0039-01	TCGA-02-0039	0
gbm_tcga_pan_can_atlas_2018	TCGA-02-0039-01	TCGA-02-0039	0
gbm_tcga_pub	TCGA-02-0039-01	TCGA-02-0039	0
gbm_tcga_pub2013	TCGA-02-0039-01	TCGA-02-0039	0
lgggbm_tcga_pub	TCGA-02-0039-01	TCGA-02-0039	0
gbm_tcga	TCGA-02-0043-01	TCGA-02-0043	0
gbm_tcga_pan_can_atlas_2018	TCGA-02-0043-01	TCGA-02-0043	0
gbm_tcga_pub	TCGA-02-0043-01	TCGA-02-0043	0
gbm_tcga_pub2013	TCGA-02-0043-01	TCGA-02-0043	0
lgggbm_tcga_pub	TCGA-02-0043-01	TCGA-02-0043	0
gbm_tcga	TCGA-02-0046-01	TCGA-02-0046	0
gbm_tcga_pan_can_atlas_2018	TCGA-02-0046-01	TCGA-02-0046	0
gbm_tcga_pub	TCGA-02-0046-01	TCGA-02-0046	0
gbm_tcga_pub2013	TCGA-02-0046-01	TCGA-02-0046	0
lgggbm_tcga_pub	TCGA-02-0046-01	TCGA-02-0046	0
gbm_tcga	TCGA-02-0047-01	TCGA-02-0047	0
gbm_tcga_pan_can_atlas_2018	TCGA-02-0047-01	TCGA-02-0047	0
gbm_tcga_pub	TCGA-02-0047-01	TCGA-02-0047	0
gbm_tcga_pub2013	TCGA-02-0047-01	TCGA-02-0047	0
lgggbm_tcga_pub	TCGA-02-0047-01	TCGA-02-0047	0
gbm_tcga	TCGA-02-0048-01	TCGA-02-0048	0
gbm_tcga_pan_can_atlas_2018	TCGA-02-0048-01	TCGA-02-0048	0
gbm_tcga_pub	TCGA-02-0048-01	TCGA-02-0048	0
gbm_tcga_pub2013	TCGA-02-0048-01	TCGA-02-0048	0
lgggbm_tcga_pub	TCGA-02-0048-01	TCGA-02-0048	0
gbm_tcga	TCGA-02-0051-01	TCGA-02-0051	0
gbm_tcga_pan_can_atlas_2018	TCGA-02-0051-01	TCGA-02-0051	0
gbm_tcga_pub2013	TCGA-02-0051-01	TCGA-02-0051	0
lgggbm_tcga_pub	TCGA-02-0051-01	TCGA-02-0051	0
gbm_tcga	TCGA-02-0052-01	TCGA-02-0052	0
gbm_tcga_pan_can_atlas_2018	TCGA-02-0052-01	TCGA-02-0052	0
gbm_tcga_pub	TCGA-02-0052-01	TCGA-02-0052	0
gbm_tcga_pub2013	TCGA-02-0052-01	TCGA-02-0052	0
lgggbm_tcga_pub	TCGA-02-0052-01	TCGA-02-0052	0
gbm_tcga	TCGA-02-0054-01	TCGA-02-0054	0
gbm_tcga_pan_can_atlas_2018	TCGA-02-0054-01	TCGA-02-0054	0
gbm_tcga_pub	TCGA-02-0054-01	TCGA-02-0054	0
gbm_tcga_pub2013	TCGA-02-0054-01	TCGA-02-0054	0
lgggbm_tcga_pub	TCGA-02-0054-01	TCGA-02-0054	0
gbm_tcga	TCGA-02-0055-01	TCGA-02-0055	0
gbm_tcga_pan_can_atlas_2018	TCGA-02-0055-01	TCGA-02-0055	0
gbm_tcga_pub	TCGA-02-0055-01	TCGA-02-0055	0
gbm_tcga_pub2013	TCGA-02-0055-01	TCGA-02-0055	0
lgggbm_tcga_pub	TCGA-02-0055-01	TCGA-02-0055	0
gbm_tcga	TCGA-02-0057-01	TCGA-02-0057	0
gbm_tcga_pan_can_atlas_2018	TCGA-02-0057-01	TCGA-02-0057	0
gbm_tcga_pub	TCGA-02-0057-01	TCGA-02-0057	0
gbm_tcga_pub2013	TCGA-02-0057-01	TCGA-02-0057	0
lgggbm_tcga_pub	TCGA-02-0057-01	TCGA-02-0057	0
gbm_tcga	TCGA-02-0058-01	TCGA-02-0058	0
gbm_tcga_pan_can_atlas_2018	TCGA-02-0058-01	TCGA-02-0058	0
gbm_tcga_pub	TCGA-02-0058-01	TCGA-02-0058	0
gbm_tcga_pub2013	TCGA-02-0058-01	TCGA-02-0058	0
lgggbm_tcga_pub	TCGA-02-0058-01	TCGA-02-0058	0
gbm_tcga	TCGA-02-0059-01	TCGA-02-0059	0
gbm_tcga_pan_can_atlas_2018	TCGA-02-0059-01	TCGA-02-0059	0
gbm_tcga_pub2013	TCGA-02-0059-01	TCGA-02-0059	0
lgggbm_tcga_pub	TCGA-02-0059-01	TCGA-02-0059	0
gbm_tcga	TCGA-02-0060-01	TCGA-02-0060	0
gbm_tcga_pan_can_atlas_2018	TCGA-02-0060-01	TCGA-02-0060	0
gbm_tcga_pub	TCGA-02-0060-01	TCGA-02-0060	0
gbm_tcga_pub2013	TCGA-02-0060-01	TCGA-02-0060	0
lgggbm_tcga_pub	TCGA-02-0060-01	TCGA-02-0060	0
gbm_tcga	TCGA-02-0064-01	TCGA-02-0064	0
gbm_tcga_pan_can_atlas_2018	TCGA-02-0064-01	TCGA-02-0064	0
gbm_tcga_pub	TCGA-02-0064-01	TCGA-02-0064	0
gbm_tcga_pub2013	TCGA-02-0064-01	TCGA-02-0064	0
lgggbm_tcga_pub	TCGA-02-0064-01	TCGA-02-0064	0
gbm_tcga	TCGA-02-0068-01	TCGA-02-0068	0
gbm_tcga_pan_can_atlas_2018	TCGA-02-0068-01	TCGA-02-0068	0
gbm_tcga_pub	TCGA-02-0068-01	TCGA-02-0068	0
gbm_tcga_pub2013	TCGA-02-0068-01	TCGA-02-0068	0
lgggbm_tcga_pub	TCGA-02-0068-01	TCGA-02-0068	0
gbm_tcga	TCGA-02-0069-01	TCGA-02-0069	0
gbm_tcga_pan_can_atlas_2018	TCGA-02-0069-01	TCGA-02-0069	0
gbm_tcga_pub	TCGA-02-0069-01	TCGA-02-0069	0
gbm_tcga_pub2013	TCGA-02-0069-01	TCGA-02-0069	0
lgggbm_tcga_pub	TCGA-02-0069-01	TCGA-02-0069	0
gbm_tcga	TCGA-02-0070-01	TCGA-02-0070	0
gbm_tcga_pan_can_atlas_2018	TCGA-02-0070-01	TCGA-02-0070	0
gbm_tcga_pub	TCGA-02-0070-01	TCGA-02-0070	0
gbm_tcga_pub2013	TCGA-02-0070-01	TCGA-02-0070	0
lgggbm_tcga_pub	TCGA-02-0070-01	TCGA-02-0070	0
gbm_tcga	TCGA-02-0071-01	TCGA-02-0071	0
gbm_tcga_pan_can_atlas_2018	TCGA-02-0071-01	TCGA-02-0071	0
gbm_tcga_pub	TCGA-02-0071-01	TCGA-02-0071	0
gbm_tcga_pub2013	TCGA-02-0071-01	TCGA-02-0071	0
lgggbm_tcga_pub	TCGA-02-0071-01	TCGA-02-0071	0
gbm_tcga	TCGA-02-0074-01	TCGA-02-0074	0
gbm_tcga_pan_can_atlas_2018	TCGA-02-0074-01	TCGA-02-0074	0
gbm_tcga_pub	TCGA-02-0074-01	TCGA-02-0074	0
gbm_tcga_pub2013	TCGA-02-0074-01	TCGA-02-0074	0
lgggbm_tcga_pub	TCGA-02-0074-01	TCGA-02-0074	0
gbm_tcga	TCGA-02-0075-01	TCGA-02-0075	0
gbm_tcga_pan_can_atlas_2018	TCGA-02-0075-01	TCGA-02-0075	0
gbm_tcga_pub	TCGA-02-0075-01	TCGA-02-0075	0
gbm_tcga_pub2013	TCGA-02-0075-01	TCGA-02-0075	0
lgggbm_tcga_pub	TCGA-02-0075-01	TCGA-02-0075	0
gbm_tcga	TCGA-02-0079-01	TCGA-02-0079	0
gbm_tcga_pan_can_atlas_2018	TCGA-02-0079-01	TCGA-02-0079	0
gbm_tcga_pub	TCGA-02-0079-01	TCGA-02-0079	0
gbm_tcga_pub2013	TCGA-02-0079-01	TCGA-02-0079	0
lgggbm_tcga_pub	TCGA-02-0079-01	TCGA-02-0079	0
gbm_tcga	TCGA-02-0080-01	TCGA-02-0080	0
gbm_tcga_pan_can_atlas_2018	TCGA-02-0080-01	TCGA-02-0080	0
gbm_tcga_pub	TCGA-02-0080-01	TCGA-02-0080	0
gbm_tcga_pub2013	TCGA-02-0080-01	TCGA-02-0080	0
lgggbm_tcga_pub	TCGA-02-0080-01	TCGA-02-0080	0
gbm_tcga	TCGA-02-0083-01	TCGA-02-0083	0
gbm_tcga_pan_can_atlas_2018	TCGA-02-0083-01	TCGA-02-0083	0
gbm_tcga_pub	TCGA-02-0083-01	TCGA-02-0083	0
gbm_tcga_pub2013	TCGA-02-0083-01	TCGA-02-0083	0
lgggbm_tcga_pub	TCGA-02-0083-01	TCGA-02-0083	0
gbm_tcga	TCGA-02-0084-01	TCGA-02-0084	0
gbm_tcga_pan_can_atlas_2018	TCGA-02-0084-01	TCGA-02-0084	0
gbm_tcga_pub	TCGA-02-0084-01	TCGA-02-0084	0
gbm_tcga_pub2013	TCGA-02-0084-01	TCGA-02-0084	0
lgggbm_tcga_pub	TCGA-02-0084-01	TCGA-02-0084	0
gbm_tcga	TCGA-02-0085-01	TCGA-02-0085	0
gbm_tcga_pan_can_atlas_2018	TCGA-02-0085-01	TCGA-02-0085	0
gbm_tcga_pub	TCGA-02-0085-01	TCGA-02-0085	0
gbm_tcga_pub2013	TCGA-02-0085-01	TCGA-02-0085	0
lgggbm_tcga_pub	TCGA-02-0085-01	TCGA-02-0085	0
gbm_tcga	TCGA-02-0086-01	TCGA-02-0086	0
gbm_tcga_pan_can_atlas_2018	TCGA-02-0086-01	TCGA-02-0086	0
gbm_tcga_pub	TCGA-02-0086-01	TCGA-02-0086	0
gbm_tcga_pub2013	TCGA-02-0086-01	TCGA-02-0086	0
lgggbm_tcga_pub	TCGA-02-0086-01	TCGA-02-0086	0
gbm_tcga	TCGA-02-0087-01	TCGA-02-0087	0
gbm_tcga_pan_can_atlas_2018	TCGA-02-0087-01	TCGA-02-0087	0
gbm_tcga_pub	TCGA-02-0087-01	TCGA-02-0087	0
gbm_tcga_pub2013	TCGA-02-0087-01	TCGA-02-0087	0
lgggbm_tcga_pub	TCGA-02-0087-01	TCGA-02-0087	0
gbm_tcga	TCGA-02-0089-01	TCGA-02-0089	0
gbm_tcga_pan_can_atlas_2018	TCGA-02-0089-01	TCGA-02-0089	0
gbm_tcga_pub	TCGA-02-0089-01	TCGA-02-0089	0
gbm_tcga_pub2013	TCGA-02-0089-01	TCGA-02-0089	0
lgggbm_tcga_pub	TCGA-02-0089-01	TCGA-02-0089	0
gbm_tcga	TCGA-02-0099-01	TCGA-02-0099	0
gbm_tcga_pan_can_atlas_2018	TCGA-02-0099-01	TCGA-02-0099	0
gbm_tcga_pub	TCGA-02-0099-01	TCGA-02-0099	0
gbm_tcga_pub2013	TCGA-02-0099-01	TCGA-02-0099	0
lgggbm_tcga_pub	TCGA-02-0099-01	TCGA-02-0099	0
gbm_tcga	TCGA-02-0102-01	TCGA-02-0102	0
gbm_tcga_pan_can_atlas_2018	TCGA-02-0102-01	TCGA-02-0102	0
gbm_tcga_pub	TCGA-02-0102-01	TCGA-02-0102	0
gbm_tcga_pub2013	TCGA-02-0102-01	TCGA-02-0102	0
lgggbm_tcga_pub	TCGA-02-0102-01	TCGA-02-0102	0
gbm_tcga	TCGA-02-0104-01	TCGA-02-0104	0
gbm_tcga_pan_can_atlas_2018	TCGA-02-0104-01	TCGA-02-0104	0
gbm_tcga_pub	TCGA-02-0104-01	TCGA-02-0104	0
gbm_tcga_pub2013	TCGA-02-0104-01	TCGA-02-0104	0
lgggbm_tcga_pub	TCGA-02-0104-01	TCGA-02-0104	0
gbm_tcga	TCGA-02-0106-01	TCGA-02-0106	0
gbm_tcga_pan_can_atlas_2018	TCGA-02-0106-01	TCGA-02-0106	0
gbm_tcga_pub	TCGA-02-0106-01	TCGA-02-0106	0
gbm_tcga_pub2013	TCGA-02-0106-01	TCGA-02-0106	0
lgggbm_tcga_pub	TCGA-02-0106-01	TCGA-02-0106	0
gbm_tcga	TCGA-02-0107-01	TCGA-02-0107	0
gbm_tcga_pan_can_atlas_2018	TCGA-02-0107-01	TCGA-02-0107	0
gbm_tcga_pub	TCGA-02-0107-01	TCGA-02-0107	0
gbm_tcga_pub2013	TCGA-02-0107-01	TCGA-02-0107	0
lgggbm_tcga_pub	TCGA-02-0107-01	TCGA-02-0107	0
gbm_tcga	TCGA-02-0111-01	TCGA-02-0111	0
gbm_tcga_pan_can_atlas_2018	TCGA-02-0111-01	TCGA-02-0111	0
gbm_tcga_pub	TCGA-02-0111-01	TCGA-02-0111	0
gbm_tcga_pub2013	TCGA-02-0111-01	TCGA-02-0111	0
lgggbm_tcga_pub	TCGA-02-0111-01	TCGA-02-0111	0
gbm_tcga	TCGA-02-0113-01	TCGA-02-0113	0
gbm_tcga_pan_can_atlas_2018	TCGA-02-0113-01	TCGA-02-0113	0
gbm_tcga_pub	TCGA-02-0113-01	TCGA-02-0113	0
gbm_tcga_pub2013	TCGA-02-0113-01	TCGA-02-0113	0
lgggbm_tcga_pub	TCGA-02-0113-01	TCGA-02-0113	0
gbm_tcga	TCGA-02-0114-01	TCGA-02-0114	0
gbm_tcga_pan_can_atlas_2018	TCGA-02-0114-01	TCGA-02-0114	0
gbm_tcga_pub	TCGA-02-0114-01	TCGA-02-0114	0
gbm_tcga_pub2013	TCGA-02-0114-01	TCGA-02-0114	0
lgggbm_tcga_pub	TCGA-02-0114-01	TCGA-02-0114	0
gbm_tcga	TCGA-02-0115-01	TCGA-02-0115	0
gbm_tcga_pan_can_atlas_2018	TCGA-02-0115-01	TCGA-02-0115	0
gbm_tcga_pub	TCGA-02-0115-01	TCGA-02-0115	0
gbm_tcga_pub2013	TCGA-02-0115-01	TCGA-02-0115	0
lgggbm_tcga_pub	TCGA-02-0115-01	TCGA-02-0115	0
gbm_tcga	TCGA-02-0116-01	TCGA-02-0116	0
gbm_tcga_pan_can_atlas_2018	TCGA-02-0116-01	TCGA-02-0116	0
gbm_tcga_pub	TCGA-02-0116-01	TCGA-02-0116	0
gbm_tcga_pub2013	TCGA-02-0116-01	TCGA-02-0116	0
lgggbm_tcga_pub	TCGA-02-0116-01	TCGA-02-0116	0
lgggbm_tcga_pub	TCGA-02-0250-01	TCGA-02-0250	0
gbm_tcga	TCGA-02-0258-01	TCGA-02-0258	0
gbm_tcga_pan_can_atlas_2018	TCGA-02-0258-01	TCGA-02-0258	0
gbm_tcga_pub	TCGA-02-0258-01	TCGA-02-0258	0
gbm_tcga_pub2013	TCGA-02-0258-01	TCGA-02-0258	0
lgggbm_tcga_pub	TCGA-02-0258-01	TCGA-02-0258	0
gbm_tcga	TCGA-02-0260-01	TCGA-02-0260	0
gbm_tcga_pan_can_atlas_2018	TCGA-02-0260-01	TCGA-02-0260	0
gbm_tcga_pub	TCGA-02-0260-01	TCGA-02-0260	0
gbm_tcga_pub2013	TCGA-02-0260-01	TCGA-02-0260	0
lgggbm_tcga_pub	TCGA-02-0260-01	TCGA-02-0260	0
gbm_tcga	TCGA-02-0266-01	TCGA-02-0266	0
gbm_tcga_pan_can_atlas_2018	TCGA-02-0266-01	TCGA-02-0266	0
gbm_tcga_pub	TCGA-02-0266-01	TCGA-02-0266	0
gbm_tcga_pub2013	TCGA-02-0266-01	TCGA-02-0266	0
lgggbm_tcga_pub	TCGA-02-0266-01	TCGA-02-0266	0
gbm_tcga	TCGA-02-0269-01	TCGA-02-0269	0
gbm_tcga_pan_can_atlas_2018	TCGA-02-0269-01	TCGA-02-0269	0
gbm_tcga_pub	TCGA-02-0269-01	TCGA-02-0269	0
gbm_tcga_pub2013	TCGA-02-0269-01	TCGA-02-0269	0
lgggbm_tcga_pub	TCGA-02-0269-01	TCGA-02-0269	0
gbm_tcga	TCGA-02-0271-01	TCGA-02-0271	0
gbm_tcga_pan_can_atlas_2018	TCGA-02-0271-01	TCGA-02-0271	0
gbm_tcga_pub	TCGA-02-0271-01	TCGA-02-0271	0
gbm_tcga_pub2013	TCGA-02-0271-01	TCGA-02-0271	0
lgggbm_tcga_pub	TCGA-02-0271-01	TCGA-02-0271	0
gbm_tcga	TCGA-02-0281-01	TCGA-02-0281	0
gbm_tcga_pan_can_atlas_2018	TCGA-02-0281-01	TCGA-02-0281	0
gbm_tcga_pub	TCGA-02-0281-01	TCGA-02-0281	0
gbm_tcga_pub2013	TCGA-02-0281-01	TCGA-02-0281	0
lgggbm_tcga_pub	TCGA-02-0281-01	TCGA-02-0281	0
gbm_tcga	TCGA-02-0285-01	TCGA-02-0285	0
gbm_tcga_pan_can_atlas_2018	TCGA-02-0285-01	TCGA-02-0285	0
gbm_tcga_pub	TCGA-02-0285-01	TCGA-02-0285	0
gbm_tcga_pub2013	TCGA-02-0285-01	TCGA-02-0285	0
lgggbm_tcga_pub	TCGA-02-0285-01	TCGA-02-0285	0
gbm_tcga	TCGA-02-0289-01	TCGA-02-0289	0
gbm_tcga_pan_can_atlas_2018	TCGA-02-0289-01	TCGA-02-0289	0
gbm_tcga_pub	TCGA-02-0289-01	TCGA-02-0289	0
gbm_tcga_pub2013	TCGA-02-0289-01	TCGA-02-0289	0
lgggbm_tcga_pub	TCGA-02-0289-01	TCGA-02-0289	0
gbm_tcga	TCGA-02-0290-01	TCGA-02-0290	0
gbm_tcga_pan_can_atlas_2018	TCGA-02-0290-01	TCGA-02-0290	0
gbm_tcga_pub	TCGA-02-0290-01	TCGA-02-0290	0
gbm_tcga_pub2013	TCGA-02-0290-01	TCGA-02-0290	0
lgggbm_tcga_pub	TCGA-02-0290-01	TCGA-02-0290	0
gbm_tcga	TCGA-02-0317-01	TCGA-02-0317	0
gbm_tcga_pan_can_atlas_2018	TCGA-02-0317-01	TCGA-02-0317	0
gbm_tcga_pub	TCGA-02-0317-01	TCGA-02-0317	0
gbm_tcga_pub2013	TCGA-02-0317-01	TCGA-02-0317	0
lgggbm_tcga_pub	TCGA-02-0317-01	TCGA-02-0317	0
gbm_tcga	TCGA-02-0321-01	TCGA-02-0321	0
gbm_tcga_pan_can_atlas_2018	TCGA-02-0321-01	TCGA-02-0321	0
gbm_tcga_pub	TCGA-02-0321-01	TCGA-02-0321	0
gbm_tcga_pub2013	TCGA-02-0321-01	TCGA-02-0321	0
lgggbm_tcga_pub	TCGA-02-0321-01	TCGA-02-0321	0
gbm_tcga	TCGA-02-0324-01	TCGA-02-0324	0
gbm_tcga_pan_can_atlas_2018	TCGA-02-0324-01	TCGA-02-0324	0
gbm_tcga_pub	TCGA-02-0324-01	TCGA-02-0324	0
gbm_tcga_pub2013	TCGA-02-0324-01	TCGA-02-0324	0
lgggbm_tcga_pub	TCGA-02-0324-01	TCGA-02-0324	0
gbm_tcga	TCGA-02-0325-01	TCGA-02-0325	0
gbm_tcga_pan_can_atlas_2018	TCGA-02-0325-01	TCGA-02-0325	0
gbm_tcga_pub	TCGA-02-0325-01	TCGA-02-0325	0
gbm_tcga_pub2013	TCGA-02-0325-01	TCGA-02-0325	0
lgggbm_tcga_pub	TCGA-02-0325-01	TCGA-02-0325	0
gbm_tcga	TCGA-02-0326-01	TCGA-02-0326	0
gbm_tcga_pan_can_atlas_2018	TCGA-02-0326-01	TCGA-02-0326	0
gbm_tcga_pub	TCGA-02-0326-01	TCGA-02-0326	0
gbm_tcga_pub2013	TCGA-02-0326-01	TCGA-02-0326	0
lgggbm_tcga_pub	TCGA-02-0326-01	TCGA-02-0326	0
lgggbm_tcga_pub	TCGA-02-0329-01	TCGA-02-0329	0
gbm_tcga	TCGA-02-0330-01	TCGA-02-0330	0
gbm_tcga_pan_can_atlas_2018	TCGA-02-0330-01	TCGA-02-0330	0
gbm_tcga_pub	TCGA-02-0330-01	TCGA-02-0330	0
gbm_tcga_pub2013	TCGA-02-0330-01	TCGA-02-0330	0
lgggbm_tcga_pub	TCGA-02-0330-01	TCGA-02-0330	0
gbm_tcga	TCGA-02-0332-01	TCGA-02-0332	0
gbm_tcga_pan_can_atlas_2018	TCGA-02-0332-01	TCGA-02-0332	0
gbm_tcga_pub	TCGA-02-0332-01	TCGA-02-0332	0
gbm_tcga_pub2013	TCGA-02-0332-01	TCGA-02-0332	0
lgggbm_tcga_pub	TCGA-02-0332-01	TCGA-02-0332	0
gbm_tcga	TCGA-02-0333-01	TCGA-02-0333	0
gbm_tcga_pan_can_atlas_2018	TCGA-02-0333-01	TCGA-02-0333	0
gbm_tcga_pub	TCGA-02-0333-01	TCGA-02-0333	0
gbm_tcga_pub2013	TCGA-02-0333-01	TCGA-02-0333	0
lgggbm_tcga_pub	TCGA-02-0333-01	TCGA-02-0333	0
lgggbm_tcga_pub	TCGA-02-0336-01	TCGA-02-0336	0
gbm_tcga	TCGA-02-0337-01	TCGA-02-0337	0
gbm_tcga_pan_can_atlas_2018	TCGA-02-0337-01	TCGA-02-0337	0
gbm_tcga_pub	TCGA-02-0337-01	TCGA-02-0337	0
gbm_tcga_pub2013	TCGA-02-0337-01	TCGA-02-0337	0
lgggbm_tcga_pub	TCGA-02-0337-01	TCGA-02-0337	0
gbm_tcga	TCGA-02-0338-01	TCGA-02-0338	0
gbm_tcga_pan_can_atlas_2018	TCGA-02-0338-01	TCGA-02-0338	0
gbm_tcga_pub	TCGA-02-0338-01	TCGA-02-0338	0
gbm_tcga_pub2013	TCGA-02-0338-01	TCGA-02-0338	0
lgggbm_tcga_pub	TCGA-02-0338-01	TCGA-02-0338	0
gbm_tcga	TCGA-02-0339-01	TCGA-02-0339	0
gbm_tcga_pan_can_atlas_2018	TCGA-02-0339-01	TCGA-02-0339	0
gbm_tcga_pub	TCGA-02-0339-01	TCGA-02-0339	0
gbm_tcga_pub2013	TCGA-02-0339-01	TCGA-02-0339	0
lgggbm_tcga_pub	TCGA-02-0339-01	TCGA-02-0339	0
gbm_tcga	TCGA-02-0422-01	TCGA-02-0422	0
gbm_tcga_pan_can_atlas_2018	TCGA-02-0422-01	TCGA-02-0422	0
gbm_tcga_pub	TCGA-02-0422-01	TCGA-02-0422	0
gbm_tcga_pub2013	TCGA-02-0422-01	TCGA-02-0422	0
lgggbm_tcga_pub	TCGA-02-0422-01	TCGA-02-0422	0
gbm_tcga	TCGA-02-0430-01	TCGA-02-0430	0
gbm_tcga_pan_can_atlas_2018	TCGA-02-0430-01	TCGA-02-0430	0
gbm_tcga_pub	TCGA-02-0430-01	TCGA-02-0430	0
gbm_tcga_pub2013	TCGA-02-0430-01	TCGA-02-0430	0
lgggbm_tcga_pub	TCGA-02-0430-01	TCGA-02-0430	0
gbm_tcga	TCGA-02-0432-01	TCGA-02-0432	0
gbm_tcga_pan_can_atlas_2018	TCGA-02-0432-01	TCGA-02-0432	0
gbm_tcga_pub	TCGA-02-0432-01	TCGA-02-0432	0
gbm_tcga_pub2013	TCGA-02-0432-01	TCGA-02-0432	0
lgggbm_tcga_pub	TCGA-02-0432-01	TCGA-02-0432	0
gbm_tcga_pub	TCGA-02-0439-01	TCGA-02-0439	0
gbm_tcga_pub2013	TCGA-02-0439-01	TCGA-02-0439	0
lgggbm_tcga_pub	TCGA-02-0439-01	TCGA-02-0439	0
gbm_tcga	TCGA-02-0440-01	TCGA-02-0440	0
gbm_tcga_pan_can_atlas_2018	TCGA-02-0440-01	TCGA-02-0440	0
gbm_tcga_pub	TCGA-02-0440-01	TCGA-02-0440	0
gbm_tcga_pub2013	TCGA-02-0440-01	TCGA-02-0440	0
lgggbm_tcga_pub	TCGA-02-0440-01	TCGA-02-0440	0
gbm_tcga	TCGA-02-0446-01	TCGA-02-0446	0
gbm_tcga_pan_can_atlas_2018	TCGA-02-0446-01	TCGA-02-0446	0
gbm_tcga_pub	TCGA-02-0446-01	TCGA-02-0446	0
gbm_tcga_pub2013	TCGA-02-0446-01	TCGA-02-0446	0
lgggbm_tcga_pub	TCGA-02-0446-01	TCGA-02-0446	0
gbm_tcga	TCGA-02-0451-01	TCGA-02-0451	0
gbm_tcga_pan_can_atlas_2018	TCGA-02-0451-01	TCGA-02-0451	0
gbm_tcga_pub	TCGA-02-0451-01	TCGA-02-0451	0
gbm_tcga_pub2013	TCGA-02-0451-01	TCGA-02-0451	0
lgggbm_tcga_pub	TCGA-02-0451-01	TCGA-02-0451	0
gbm_tcga	TCGA-02-0456-01	TCGA-02-0456	0
gbm_tcga_pan_can_atlas_2018	TCGA-02-0456-01	TCGA-02-0456	0
gbm_tcga_pub	TCGA-02-0456-01	TCGA-02-0456	0
gbm_tcga_pub2013	TCGA-02-0456-01	TCGA-02-0456	0
lgggbm_tcga_pub	TCGA-02-0456-01	TCGA-02-0456	0
gbm_tcga	TCGA-02-2466-01	TCGA-02-2466	0
gbm_tcga_pan_can_atlas_2018	TCGA-02-2466-01	TCGA-02-2466	0
gbm_tcga_pub2013	TCGA-02-2466-01	TCGA-02-2466	0
lgggbm_tcga_pub	TCGA-02-2466-01	TCGA-02-2466	0
gbm_tcga	TCGA-02-2470-01	TCGA-02-2470	0
gbm_tcga_pan_can_atlas_2018	TCGA-02-2470-01	TCGA-02-2470	0
gbm_tcga_pub2013	TCGA-02-2470-01	TCGA-02-2470	0
lgggbm_tcga_pub	TCGA-02-2470-01	TCGA-02-2470	0
gbm_tcga	TCGA-02-2483-01	TCGA-02-2483	0
gbm_tcga_pan_can_atlas_2018	TCGA-02-2483-01	TCGA-02-2483	0
gbm_tcga_pub2013	TCGA-02-2483-01	TCGA-02-2483	0
lgggbm_tcga_pub	TCGA-02-2483-01	TCGA-02-2483	0
gbm_tcga	TCGA-02-2485-01	TCGA-02-2485	0
gbm_tcga_pan_can_atlas_2018	TCGA-02-2485-01	TCGA-02-2485	0
gbm_tcga_pub2013	TCGA-02-2485-01	TCGA-02-2485	0
lgggbm_tcga_pub	TCGA-02-2485-01	TCGA-02-2485	0
gbm_tcga	TCGA-02-2486-01	TCGA-02-2486	0
gbm_tcga_pan_can_atlas_2018	TCGA-02-2486-01	TCGA-02-2486	0
gbm_tcga_pub2013	TCGA-02-2486-01	TCGA-02-2486	0
lgggbm_tcga_pub	TCGA-02-2486-01	TCGA-02-2486	0
gbm_tcga	TCGA-06-0119-01	TCGA-06-0119	0
gbm_tcga_pan_can_atlas_2018	TCGA-06-0119-01	TCGA-06-0119	0
gbm_tcga_pub2013	TCGA-06-0119-01	TCGA-06-0119	0
lgggbm_tcga_pub	TCGA-06-0119-01	TCGA-06-0119	0
gbm_tcga	TCGA-06-0121-01	TCGA-06-0121	0
gbm_tcga_pan_can_atlas_2018	TCGA-06-0121-01	TCGA-06-0121	0
gbm_tcga_pub2013	TCGA-06-0121-01	TCGA-06-0121	0
lgggbm_tcga_pub	TCGA-06-0121-01	TCGA-06-0121	0
gbm_tcga	TCGA-06-0122-01	TCGA-06-0122	0
gbm_tcga_pan_can_atlas_2018	TCGA-06-0122-01	TCGA-06-0122	0
gbm_tcga_pub	TCGA-06-0122-01	TCGA-06-0122	0
gbm_tcga_pub2013	TCGA-06-0122-01	TCGA-06-0122	0
lgggbm_tcga_pub	TCGA-06-0122-01	TCGA-06-0122	0
gbm_tcga	TCGA-06-0124-01	TCGA-06-0124	0
gbm_tcga_pan_can_atlas_2018	TCGA-06-0124-01	TCGA-06-0124	0
gbm_tcga_pub	TCGA-06-0124-01	TCGA-06-0124	0
gbm_tcga_pub2013	TCGA-06-0124-01	TCGA-06-0124	0
lgggbm_tcga_pub	TCGA-06-0124-01	TCGA-06-0124	0
gbm_tcga	TCGA-06-0125-01	TCGA-06-0125	0
gbm_tcga_pan_can_atlas_2018	TCGA-06-0125-01	TCGA-06-0125	0
gbm_tcga_pub	TCGA-06-0125-01	TCGA-06-0125	0
gbm_tcga_pub2013	TCGA-06-0125-01	TCGA-06-0125	0
lgggbm_tcga_pub	TCGA-06-0125-01	TCGA-06-0125	0
gbm_tcga	TCGA-06-0125-02	TCGA-06-0125	0
gbm_tcga_pan_can_atlas_2018	TCGA-06-0125-02	TCGA-06-0125	0
gbm_tcga	TCGA-06-0126-01	TCGA-06-0126	0
gbm_tcga_pan_can_atlas_2018	TCGA-06-0126-01	TCGA-06-0126	0
gbm_tcga_pub	TCGA-06-0126-01	TCGA-06-0126	0
gbm_tcga_pub2013	TCGA-06-0126-01	TCGA-06-0126	0
lgggbm_tcga_pub	TCGA-06-0126-01	TCGA-06-0126	0
gbm_tcga	TCGA-06-0127-01	TCGA-06-0127	0
gbm_tcga_pan_can_atlas_2018	TCGA-06-0127-01	TCGA-06-0127	0
gbm_tcga_pub	TCGA-06-0127-01	TCGA-06-0127	0
gbm_tcga_pub2013	TCGA-06-0127-01	TCGA-06-0127	0
lgggbm_tcga_pub	TCGA-06-0127-01	TCGA-06-0127	0
gbm_tcga	TCGA-06-0128-01	TCGA-06-0128	0
gbm_tcga_pan_can_atlas_2018	TCGA-06-0128-01	TCGA-06-0128	0
gbm_tcga_pub	TCGA-06-0128-01	TCGA-06-0128	0
gbm_tcga_pub2013	TCGA-06-0128-01	TCGA-06-0128	0
lgggbm_tcga_pub	TCGA-06-0128-01	TCGA-06-0128	0
gbm_tcga	TCGA-06-0129-01	TCGA-06-0129	0
gbm_tcga_pan_can_atlas_2018	TCGA-06-0129-01	TCGA-06-0129	0
gbm_tcga_pub	TCGA-06-0129-01	TCGA-06-0129	0
gbm_tcga_pub2013	TCGA-06-0129-01	TCGA-06-0129	0
lgggbm_tcga_pub	TCGA-06-0129-01	TCGA-06-0129	0
gbm_tcga	TCGA-06-0130-01	TCGA-06-0130	0
gbm_tcga_pan_can_atlas_2018	TCGA-06-0130-01	TCGA-06-0130	0
gbm_tcga_pub	TCGA-06-0130-01	TCGA-06-0130	0
gbm_tcga_pub2013	TCGA-06-0130-01	TCGA-06-0130	0
lgggbm_tcga_pub	TCGA-06-0130-01	TCGA-06-0130	0
lgggbm_tcga_pub	TCGA-06-0131-01	TCGA-06-0131	0
gbm_tcga	TCGA-06-0132-01	TCGA-06-0132	0
gbm_tcga_pan_can_atlas_2018	TCGA-06-0132-01	TCGA-06-0132	0
gbm_tcga_pub	TCGA-06-0132-01	TCGA-06-0132	0
gbm_tcga_pub2013	TCGA-06-0132-01	TCGA-06-0132	0
lgggbm_tcga_pub	TCGA-06-0132-01	TCGA-06-0132	0
gbm_tcga	TCGA-06-0133-01	TCGA-06-0133	0
gbm_tcga_pan_can_atlas_2018	TCGA-06-0133-01	TCGA-06-0133	0
gbm_tcga_pub	TCGA-06-0133-01	TCGA-06-0133	0
gbm_tcga_pub2013	TCGA-06-0133-01	TCGA-06-0133	0
lgggbm_tcga_pub	TCGA-06-0133-01	TCGA-06-0133	0
gbm_tcga	TCGA-06-0137-01	TCGA-06-0137	0
gbm_tcga_pan_can_atlas_2018	TCGA-06-0137-01	TCGA-06-0137	0
gbm_tcga_pub	TCGA-06-0137-01	TCGA-06-0137	0
gbm_tcga_pub2013	TCGA-06-0137-01	TCGA-06-0137	0
lgggbm_tcga_pub	TCGA-06-0137-01	TCGA-06-0137	0
gbm_tcga	TCGA-06-0138-01	TCGA-06-0138	0
gbm_tcga_pan_can_atlas_2018	TCGA-06-0138-01	TCGA-06-0138	0
gbm_tcga_pub	TCGA-06-0138-01	TCGA-06-0138	0
gbm_tcga_pub2013	TCGA-06-0138-01	TCGA-06-0138	0
lgggbm_tcga_pub	TCGA-06-0138-01	TCGA-06-0138	0
gbm_tcga	TCGA-06-0139-01	TCGA-06-0139	0
gbm_tcga_pan_can_atlas_2018	TCGA-06-0139-01	TCGA-06-0139	0
gbm_tcga_pub	TCGA-06-0139-01	TCGA-06-0139	0
gbm_tcga_pub2013	TCGA-06-0139-01	TCGA-06-0139	0
lgggbm_tcga_pub	TCGA-06-0139-01	TCGA-06-0139	0
gbm_tcga	TCGA-06-0140-01	TCGA-06-0140	0
gbm_tcga_pan_can_atlas_2018	TCGA-06-0140-01	TCGA-06-0140	0
gbm_tcga_pub2013	TCGA-06-0140-01	TCGA-06-0140	0
lgggbm_tcga_pub	TCGA-06-0140-01	TCGA-06-0140	0
gbm_tcga	TCGA-06-0141-01	TCGA-06-0141	0
gbm_tcga_pan_can_atlas_2018	TCGA-06-0141-01	TCGA-06-0141	0
gbm_tcga_pub	TCGA-06-0141-01	TCGA-06-0141	0
gbm_tcga_pub2013	TCGA-06-0141-01	TCGA-06-0141	0
lgggbm_tcga_pub	TCGA-06-0141-01	TCGA-06-0141	0
gbm_tcga	TCGA-06-0142-01	TCGA-06-0142	0
gbm_tcga_pan_can_atlas_2018	TCGA-06-0142-01	TCGA-06-0142	0
gbm_tcga_pub2013	TCGA-06-0142-01	TCGA-06-0142	0
lgggbm_tcga_pub	TCGA-06-0142-01	TCGA-06-0142	0
gbm_tcga	TCGA-06-0143-01	TCGA-06-0143	0
gbm_tcga_pan_can_atlas_2018	TCGA-06-0143-01	TCGA-06-0143	0
gbm_tcga_pub	TCGA-06-0143-01	TCGA-06-0143	0
gbm_tcga_pub2013	TCGA-06-0143-01	TCGA-06-0143	0
lgggbm_tcga_pub	TCGA-06-0143-01	TCGA-06-0143	0
gbm_tcga	TCGA-06-0145-01	TCGA-06-0145	0
gbm_tcga_pan_can_atlas_2018	TCGA-06-0145-01	TCGA-06-0145	0
gbm_tcga_pub	TCGA-06-0145-01	TCGA-06-0145	0
gbm_tcga_pub2013	TCGA-06-0145-01	TCGA-06-0145	0
lgggbm_tcga_pub	TCGA-06-0145-01	TCGA-06-0145	0
gbm_tcga	TCGA-06-0146-01	TCGA-06-0146	0
gbm_tcga_pan_can_atlas_2018	TCGA-06-0146-01	TCGA-06-0146	0
gbm_tcga_pub	TCGA-06-0146-01	TCGA-06-0146	0
gbm_tcga_pub2013	TCGA-06-0146-01	TCGA-06-0146	0
lgggbm_tcga_pub	TCGA-06-0146-01	TCGA-06-0146	0
gbm_tcga	TCGA-06-0147-01	TCGA-06-0147	0
gbm_tcga_pan_can_atlas_2018	TCGA-06-0147-01	TCGA-06-0147	0
gbm_tcga_pub	TCGA-06-0147-01	TCGA-06-0147	0
gbm_tcga_pub2013	TCGA-06-0147-01	TCGA-06-0147	0
lgggbm_tcga_pub	TCGA-06-0147-01	TCGA-06-0147	0
gbm_tcga	TCGA-06-0148-01	TCGA-06-0148	0
gbm_tcga_pan_can_atlas_2018	TCGA-06-0148-01	TCGA-06-0148	0
gbm_tcga_pub	TCGA-06-0148-01	TCGA-06-0148	0
gbm_tcga_pub2013	TCGA-06-0148-01	TCGA-06-0148	0
lgggbm_tcga_pub	TCGA-06-0148-01	TCGA-06-0148	0
gbm_tcga	TCGA-06-0149-01	TCGA-06-0149	0
gbm_tcga_pan_can_atlas_2018	TCGA-06-0149-01	TCGA-06-0149	0
gbm_tcga_pub	TCGA-06-0149-01	TCGA-06-0149	0
gbm_tcga_pub2013	TCGA-06-0149-01	TCGA-06-0149	0
lgggbm_tcga_pub	TCGA-06-0149-01	TCGA-06-0149	0
gbm_tcga	TCGA-06-0150-01	TCGA-06-0150	0
gbm_tcga_pan_can_atlas_2018	TCGA-06-0150-01	TCGA-06-0150	0
gbm_tcga_pub2013	TCGA-06-0150-01	TCGA-06-0150	0
lgggbm_tcga_pub	TCGA-06-0150-01	TCGA-06-0150	0
gbm_tcga	TCGA-06-0151-01	TCGA-06-0151	0
gbm_tcga_pan_can_atlas_2018	TCGA-06-0151-01	TCGA-06-0151	0
gbm_tcga_pub2013	TCGA-06-0151-01	TCGA-06-0151	0
lgggbm_tcga_pub	TCGA-06-0151-01	TCGA-06-0151	0
gbm_tcga	TCGA-06-0152-01	TCGA-06-0152	0
gbm_tcga_pan_can_atlas_2018	TCGA-06-0152-01	TCGA-06-0152	0
gbm_tcga_pub	TCGA-06-0152-01	TCGA-06-0152	0
gbm_tcga_pub2013	TCGA-06-0152-01	TCGA-06-0152	0
lgggbm_tcga_pub	TCGA-06-0152-01	TCGA-06-0152	0
gbm_tcga	TCGA-06-0152-02	TCGA-06-0152	0
gbm_tcga	TCGA-06-0154-01	TCGA-06-0154	0
gbm_tcga_pan_can_atlas_2018	TCGA-06-0154-01	TCGA-06-0154	0
gbm_tcga_pub	TCGA-06-0154-01	TCGA-06-0154	0
gbm_tcga_pub2013	TCGA-06-0154-01	TCGA-06-0154	0
lgggbm_tcga_pub	TCGA-06-0154-01	TCGA-06-0154	0
gbm_tcga	TCGA-06-0155-01	TCGA-06-0155	0
gbm_tcga_pan_can_atlas_2018	TCGA-06-0155-01	TCGA-06-0155	0
gbm_tcga_pub2013	TCGA-06-0155-01	TCGA-06-0155	0
lgggbm_tcga_pub	TCGA-06-0155-01	TCGA-06-0155	0
gbm_tcga	TCGA-06-0156-01	TCGA-06-0156	0
gbm_tcga_pub	TCGA-06-0156-01	TCGA-06-0156	0
gbm_tcga_pub2013	TCGA-06-0156-01	TCGA-06-0156	0
lgggbm_tcga_pub	TCGA-06-0156-01	TCGA-06-0156	0
gbm_tcga	TCGA-06-0157-01	TCGA-06-0157	0
gbm_tcga_pan_can_atlas_2018	TCGA-06-0157-01	TCGA-06-0157	0
gbm_tcga_pub	TCGA-06-0157-01	TCGA-06-0157	0
gbm_tcga_pub2013	TCGA-06-0157-01	TCGA-06-0157	0
lgggbm_tcga_pub	TCGA-06-0157-01	TCGA-06-0157	0
gbm_tcga	TCGA-06-0158-01	TCGA-06-0158	0
gbm_tcga_pan_can_atlas_2018	TCGA-06-0158-01	TCGA-06-0158	0
gbm_tcga_pub	TCGA-06-0158-01	TCGA-06-0158	0
gbm_tcga_pub2013	TCGA-06-0158-01	TCGA-06-0158	0
lgggbm_tcga_pub	TCGA-06-0158-01	TCGA-06-0158	0
gbm_tcga	TCGA-06-0159-01	TCGA-06-0159	0
gbm_tcga_pan_can_atlas_2018	TCGA-06-0159-01	TCGA-06-0159	0
gbm_tcga_pub2013	TCGA-06-0159-01	TCGA-06-0159	0
lgggbm_tcga_pub	TCGA-06-0159-01	TCGA-06-0159	0
gbm_tcga	TCGA-06-0160-01	TCGA-06-0160	0
gbm_tcga_pan_can_atlas_2018	TCGA-06-0160-01	TCGA-06-0160	0
gbm_tcga_pub2013	TCGA-06-0160-01	TCGA-06-0160	0
lgggbm_tcga_pub	TCGA-06-0160-01	TCGA-06-0160	0
gbm_tcga	TCGA-06-0162-01	TCGA-06-0162	0
gbm_tcga_pan_can_atlas_2018	TCGA-06-0162-01	TCGA-06-0162	0
gbm_tcga_pub	TCGA-06-0162-01	TCGA-06-0162	0
gbm_tcga_pub2013	TCGA-06-0162-01	TCGA-06-0162	0
lgggbm_tcga_pub	TCGA-06-0162-01	TCGA-06-0162	0
gbm_tcga	TCGA-06-0164-01	TCGA-06-0164	0
gbm_tcga_pan_can_atlas_2018	TCGA-06-0164-01	TCGA-06-0164	0
gbm_tcga_pub	TCGA-06-0164-01	TCGA-06-0164	0
gbm_tcga_pub2013	TCGA-06-0164-01	TCGA-06-0164	0
lgggbm_tcga_pub	TCGA-06-0164-01	TCGA-06-0164	0
gbm_tcga	TCGA-06-0165-01	TCGA-06-0165	0
gbm_tcga_pan_can_atlas_2018	TCGA-06-0165-01	TCGA-06-0165	0
gbm_tcga_pub2013	TCGA-06-0165-01	TCGA-06-0165	0
lgggbm_tcga_pub	TCGA-06-0165-01	TCGA-06-0165	0
gbm_tcga	TCGA-06-0166-01	TCGA-06-0166	0
gbm_tcga_pan_can_atlas_2018	TCGA-06-0166-01	TCGA-06-0166	0
gbm_tcga_pub	TCGA-06-0166-01	TCGA-06-0166	0
gbm_tcga_pub2013	TCGA-06-0166-01	TCGA-06-0166	0
lgggbm_tcga_pub	TCGA-06-0166-01	TCGA-06-0166	0
gbm_tcga_pan_can_atlas_2018	TCGA-06-0167-01	TCGA-06-0167	0
gbm_tcga_pub2013	TCGA-06-0167-01	TCGA-06-0167	0
lgggbm_tcga_pub	TCGA-06-0167-01	TCGA-06-0167	0
gbm_tcga	TCGA-06-0168-01	TCGA-06-0168	0
gbm_tcga_pan_can_atlas_2018	TCGA-06-0168-01	TCGA-06-0168	0
gbm_tcga_pub	TCGA-06-0168-01	TCGA-06-0168	0
gbm_tcga_pub2013	TCGA-06-0168-01	TCGA-06-0168	0
lgggbm_tcga_pub	TCGA-06-0168-01	TCGA-06-0168	0
gbm_tcga	TCGA-06-0169-01	TCGA-06-0169	0
gbm_tcga_pan_can_atlas_2018	TCGA-06-0169-01	TCGA-06-0169	0
gbm_tcga_pub	TCGA-06-0169-01	TCGA-06-0169	0
gbm_tcga_pub2013	TCGA-06-0169-01	TCGA-06-0169	0
lgggbm_tcga_pub	TCGA-06-0169-01	TCGA-06-0169	0
gbm_tcga	TCGA-06-0171-01	TCGA-06-0171	0
gbm_tcga_pan_can_atlas_2018	TCGA-06-0171-01	TCGA-06-0171	0
gbm_tcga_pub	TCGA-06-0171-01	TCGA-06-0171	0
gbm_tcga_pub2013	TCGA-06-0171-01	TCGA-06-0171	0
lgggbm_tcga_pub	TCGA-06-0171-01	TCGA-06-0171	0
gbm_tcga	TCGA-06-0171-02	TCGA-06-0171	0
gbm_tcga_pan_can_atlas_2018	TCGA-06-0171-02	TCGA-06-0171	0
gbm_tcga	TCGA-06-0173-01	TCGA-06-0173	0
gbm_tcga_pan_can_atlas_2018	TCGA-06-0173-01	TCGA-06-0173	0
gbm_tcga_pub	TCGA-06-0173-01	TCGA-06-0173	0
gbm_tcga_pub2013	TCGA-06-0173-01	TCGA-06-0173	0
lgggbm_tcga_pub	TCGA-06-0173-01	TCGA-06-0173	0
gbm_tcga	TCGA-06-0174-01	TCGA-06-0174	0
gbm_tcga_pan_can_atlas_2018	TCGA-06-0174-01	TCGA-06-0174	0
gbm_tcga_pub	TCGA-06-0174-01	TCGA-06-0174	0
gbm_tcga_pub2013	TCGA-06-0174-01	TCGA-06-0174	0
lgggbm_tcga_pub	TCGA-06-0174-01	TCGA-06-0174	0
gbm_tcga	TCGA-06-0175-01	TCGA-06-0175	0
gbm_tcga_pan_can_atlas_2018	TCGA-06-0175-01	TCGA-06-0175	0
gbm_tcga_pub	TCGA-06-0175-01	TCGA-06-0175	0
gbm_tcga_pub2013	TCGA-06-0175-01	TCGA-06-0175	0
lgggbm_tcga_pub	TCGA-06-0175-01	TCGA-06-0175	0
gbm_tcga	TCGA-06-0176-01	TCGA-06-0176	0
gbm_tcga_pan_can_atlas_2018	TCGA-06-0176-01	TCGA-06-0176	0
gbm_tcga_pub	TCGA-06-0176-01	TCGA-06-0176	0
gbm_tcga_pub2013	TCGA-06-0176-01	TCGA-06-0176	0
lgggbm_tcga_pub	TCGA-06-0176-01	TCGA-06-0176	0
gbm_tcga	TCGA-06-0177-01	TCGA-06-0177	0
gbm_tcga_pan_can_atlas_2018	TCGA-06-0177-01	TCGA-06-0177	0
gbm_tcga_pub	TCGA-06-0177-01	TCGA-06-0177	0
gbm_tcga_pub2013	TCGA-06-0177-01	TCGA-06-0177	0
lgggbm_tcga_pub	TCGA-06-0177-01	TCGA-06-0177	0
gbm_tcga	TCGA-06-0178-01	TCGA-06-0178	0
gbm_tcga_pan_can_atlas_2018	TCGA-06-0178-01	TCGA-06-0178	0
gbm_tcga_pub	TCGA-06-0178-01	TCGA-06-0178	0
gbm_tcga_pub2013	TCGA-06-0178-01	TCGA-06-0178	0
lgggbm_tcga_pub	TCGA-06-0178-01	TCGA-06-0178	0
gbm_tcga	TCGA-06-0179-01	TCGA-06-0179	0
gbm_tcga_pan_can_atlas_2018	TCGA-06-0179-01	TCGA-06-0179	0
gbm_tcga_pub	TCGA-06-0179-01	TCGA-06-0179	0
gbm_tcga_pub2013	TCGA-06-0179-01	TCGA-06-0179	0
lgggbm_tcga_pub	TCGA-06-0179-01	TCGA-06-0179	0
gbm_tcga	TCGA-06-0182-01	TCGA-06-0182	0
gbm_tcga_pan_can_atlas_2018	TCGA-06-0182-01	TCGA-06-0182	0
gbm_tcga_pub	TCGA-06-0182-01	TCGA-06-0182	0
gbm_tcga_pub2013	TCGA-06-0182-01	TCGA-06-0182	0
lgggbm_tcga_pub	TCGA-06-0182-01	TCGA-06-0182	0
gbm_tcga	TCGA-06-0184-01	TCGA-06-0184	0
gbm_tcga_pan_can_atlas_2018	TCGA-06-0184-01	TCGA-06-0184	0
gbm_tcga_pub	TCGA-06-0184-01	TCGA-06-0184	0
gbm_tcga_pub2013	TCGA-06-0184-01	TCGA-06-0184	0
lgggbm_tcga_pub	TCGA-06-0184-01	TCGA-06-0184	0
gbm_tcga	TCGA-06-0185-01	TCGA-06-0185	0
gbm_tcga_pan_can_atlas_2018	TCGA-06-0185-01	TCGA-06-0185	0
gbm_tcga_pub	TCGA-06-0185-01	TCGA-06-0185	0
gbm_tcga_pub2013	TCGA-06-0185-01	TCGA-06-0185	0
lgggbm_tcga_pub	TCGA-06-0185-01	TCGA-06-0185	0
gbm_tcga	TCGA-06-0187-01	TCGA-06-0187	0
gbm_tcga_pan_can_atlas_2018	TCGA-06-0187-01	TCGA-06-0187	0
gbm_tcga_pub	TCGA-06-0187-01	TCGA-06-0187	0
gbm_tcga_pub2013	TCGA-06-0187-01	TCGA-06-0187	0
lgggbm_tcga_pub	TCGA-06-0187-01	TCGA-06-0187	0
gbm_tcga	TCGA-06-0188-01	TCGA-06-0188	0
gbm_tcga_pan_can_atlas_2018	TCGA-06-0188-01	TCGA-06-0188	0
gbm_tcga_pub	TCGA-06-0188-01	TCGA-06-0188	0
gbm_tcga_pub2013	TCGA-06-0188-01	TCGA-06-0188	0
lgggbm_tcga_pub	TCGA-06-0188-01	TCGA-06-0188	0
gbm_tcga	TCGA-06-0189-01	TCGA-06-0189	0
gbm_tcga_pan_can_atlas_2018	TCGA-06-0189-01	TCGA-06-0189	0
gbm_tcga_pub	TCGA-06-0189-01	TCGA-06-0189	0
gbm_tcga_pub2013	TCGA-06-0189-01	TCGA-06-0189	0
lgggbm_tcga_pub	TCGA-06-0189-01	TCGA-06-0189	0
gbm_tcga	TCGA-06-0190-01	TCGA-06-0190	0
gbm_tcga_pan_can_atlas_2018	TCGA-06-0190-01	TCGA-06-0190	0
gbm_tcga_pub	TCGA-06-0190-01	TCGA-06-0190	0
gbm_tcga_pub2013	TCGA-06-0190-01	TCGA-06-0190	0
lgggbm_tcga_pub	TCGA-06-0190-01	TCGA-06-0190	0
gbm_tcga	TCGA-06-0190-02	TCGA-06-0190	0
gbm_tcga_pan_can_atlas_2018	TCGA-06-0190-02	TCGA-06-0190	0
gbm_tcga	TCGA-06-0192-01	TCGA-06-0192	0
gbm_tcga_pan_can_atlas_2018	TCGA-06-0192-01	TCGA-06-0192	0
gbm_tcga_pub2013	TCGA-06-0192-01	TCGA-06-0192	0
lgggbm_tcga_pub	TCGA-06-0192-01	TCGA-06-0192	0
gbm_tcga	TCGA-06-0194-01	TCGA-06-0194	0
gbm_tcga_pan_can_atlas_2018	TCGA-06-0194-01	TCGA-06-0194	0
gbm_tcga_pub	TCGA-06-0194-01	TCGA-06-0194	0
gbm_tcga_pub2013	TCGA-06-0194-01	TCGA-06-0194	0
lgggbm_tcga_pub	TCGA-06-0194-01	TCGA-06-0194	0
gbm_tcga	TCGA-06-0195-01	TCGA-06-0195	0
gbm_tcga_pan_can_atlas_2018	TCGA-06-0195-01	TCGA-06-0195	0
gbm_tcga_pub	TCGA-06-0195-01	TCGA-06-0195	0
gbm_tcga_pub2013	TCGA-06-0195-01	TCGA-06-0195	0
lgggbm_tcga_pub	TCGA-06-0195-01	TCGA-06-0195	0
gbm_tcga	TCGA-06-0197-01	TCGA-06-0197	0
gbm_tcga_pan_can_atlas_2018	TCGA-06-0197-01	TCGA-06-0197	0
gbm_tcga_pub	TCGA-06-0197-01	TCGA-06-0197	0
gbm_tcga_pub2013	TCGA-06-0197-01	TCGA-06-0197	0
lgggbm_tcga_pub	TCGA-06-0197-01	TCGA-06-0197	0
gbm_tcga	TCGA-06-0201-01	TCGA-06-0201	0
gbm_tcga_pan_can_atlas_2018	TCGA-06-0201-01	TCGA-06-0201	0
gbm_tcga_pub	TCGA-06-0201-01	TCGA-06-0201	0
gbm_tcga_pub2013	TCGA-06-0201-01	TCGA-06-0201	0
lgggbm_tcga_pub	TCGA-06-0201-01	TCGA-06-0201	0
gbm_tcga	TCGA-06-0206-01	TCGA-06-0206	0
gbm_tcga_pan_can_atlas_2018	TCGA-06-0206-01	TCGA-06-0206	0
gbm_tcga_pub	TCGA-06-0206-01	TCGA-06-0206	0
gbm_tcga_pub2013	TCGA-06-0206-01	TCGA-06-0206	0
lgggbm_tcga_pub	TCGA-06-0206-01	TCGA-06-0206	0
gbm_tcga	TCGA-06-0208-01	TCGA-06-0208	0
gbm_tcga_pan_can_atlas_2018	TCGA-06-0208-01	TCGA-06-0208	0
gbm_tcga_pub	TCGA-06-0208-01	TCGA-06-0208	0
gbm_tcga_pub2013	TCGA-06-0208-01	TCGA-06-0208	0
lgggbm_tcga_pub	TCGA-06-0208-01	TCGA-06-0208	0
gbm_tcga	TCGA-06-0209-01	TCGA-06-0209	0
gbm_tcga_pub	TCGA-06-0209-01	TCGA-06-0209	0
gbm_tcga_pub2013	TCGA-06-0209-01	TCGA-06-0209	0
lgggbm_tcga_pub	TCGA-06-0209-01	TCGA-06-0209	0
gbm_tcga	TCGA-06-0210-01	TCGA-06-0210	0
gbm_tcga_pan_can_atlas_2018	TCGA-06-0210-01	TCGA-06-0210	0
gbm_tcga_pub	TCGA-06-0210-01	TCGA-06-0210	0
gbm_tcga_pub2013	TCGA-06-0210-01	TCGA-06-0210	0
lgggbm_tcga_pub	TCGA-06-0210-01	TCGA-06-0210	0
gbm_tcga	TCGA-06-0210-02	TCGA-06-0210	0
gbm_tcga_pan_can_atlas_2018	TCGA-06-0210-02	TCGA-06-0210	0
gbm_tcga	TCGA-06-0211-01	TCGA-06-0211	0
gbm_tcga_pan_can_atlas_2018	TCGA-06-0211-01	TCGA-06-0211	0
gbm_tcga_pub	TCGA-06-0211-01	TCGA-06-0211	0
gbm_tcga_pub2013	TCGA-06-0211-01	TCGA-06-0211	0
lgggbm_tcga_pub	TCGA-06-0211-01	TCGA-06-0211	0
gbm_tcga	TCGA-06-0211-02	TCGA-06-0211	0
gbm_tcga_pan_can_atlas_2018	TCGA-06-0211-02	TCGA-06-0211	0
gbm_tcga	TCGA-06-0213-01	TCGA-06-0213	0
gbm_tcga_pan_can_atlas_2018	TCGA-06-0213-01	TCGA-06-0213	0
gbm_tcga_pub	TCGA-06-0213-01	TCGA-06-0213	0
gbm_tcga_pub2013	TCGA-06-0213-01	TCGA-06-0213	0
lgggbm_tcga_pub	TCGA-06-0213-01	TCGA-06-0213	0
gbm_tcga	TCGA-06-0214-01	TCGA-06-0214	0
gbm_tcga_pan_can_atlas_2018	TCGA-06-0214-01	TCGA-06-0214	0
gbm_tcga_pub	TCGA-06-0214-01	TCGA-06-0214	0
gbm_tcga_pub2013	TCGA-06-0214-01	TCGA-06-0214	0
lgggbm_tcga_pub	TCGA-06-0214-01	TCGA-06-0214	0
gbm_tcga	TCGA-06-0216-01	TCGA-06-0216	0
gbm_tcga_pan_can_atlas_2018	TCGA-06-0216-01	TCGA-06-0216	0
gbm_tcga_pub2013	TCGA-06-0216-01	TCGA-06-0216	0
lgggbm_tcga_pub	TCGA-06-0216-01	TCGA-06-0216	0
gbm_tcga	TCGA-06-0219-01	TCGA-06-0219	0
gbm_tcga_pan_can_atlas_2018	TCGA-06-0219-01	TCGA-06-0219	0
gbm_tcga_pub	TCGA-06-0219-01	TCGA-06-0219	0
gbm_tcga_pub2013	TCGA-06-0219-01	TCGA-06-0219	0
lgggbm_tcga_pub	TCGA-06-0219-01	TCGA-06-0219	0
gbm_tcga	TCGA-06-0221-01	TCGA-06-0221	0
gbm_tcga_pan_can_atlas_2018	TCGA-06-0221-01	TCGA-06-0221	0
gbm_tcga_pub	TCGA-06-0221-01	TCGA-06-0221	0
gbm_tcga_pub2013	TCGA-06-0221-01	TCGA-06-0221	0
lgggbm_tcga_pub	TCGA-06-0221-01	TCGA-06-0221	0
gbm_tcga	TCGA-06-0221-02	TCGA-06-0221	0
gbm_tcga_pan_can_atlas_2018	TCGA-06-0221-02	TCGA-06-0221	0
gbm_tcga	TCGA-06-0237-01	TCGA-06-0237	0
gbm_tcga_pan_can_atlas_2018	TCGA-06-0237-01	TCGA-06-0237	0
gbm_tcga_pub	TCGA-06-0237-01	TCGA-06-0237	0
gbm_tcga_pub2013	TCGA-06-0237-01	TCGA-06-0237	0
lgggbm_tcga_pub	TCGA-06-0237-01	TCGA-06-0237	0
gbm_tcga	TCGA-06-0238-01	TCGA-06-0238	0
gbm_tcga_pan_can_atlas_2018	TCGA-06-0238-01	TCGA-06-0238	0
gbm_tcga_pub	TCGA-06-0238-01	TCGA-06-0238	0
gbm_tcga_pub2013	TCGA-06-0238-01	TCGA-06-0238	0
lgggbm_tcga_pub	TCGA-06-0238-01	TCGA-06-0238	0
gbm_tcga	TCGA-06-0240-01	TCGA-06-0240	0
gbm_tcga_pan_can_atlas_2018	TCGA-06-0240-01	TCGA-06-0240	0
gbm_tcga_pub2013	TCGA-06-0240-01	TCGA-06-0240	0
lgggbm_tcga_pub	TCGA-06-0240-01	TCGA-06-0240	0
gbm_tcga	TCGA-06-0241-01	TCGA-06-0241	0
gbm_tcga_pan_can_atlas_2018	TCGA-06-0241-01	TCGA-06-0241	0
gbm_tcga_pub	TCGA-06-0241-01	TCGA-06-0241	0
gbm_tcga_pub2013	TCGA-06-0241-01	TCGA-06-0241	0
lgggbm_tcga_pub	TCGA-06-0241-01	TCGA-06-0241	0
gbm_tcga	TCGA-06-0394-01	TCGA-06-0394	0
gbm_tcga_pan_can_atlas_2018	TCGA-06-0394-01	TCGA-06-0394	0
gbm_tcga_pub	TCGA-06-0394-01	TCGA-06-0394	0
gbm_tcga_pub2013	TCGA-06-0394-01	TCGA-06-0394	0
lgggbm_tcga_pub	TCGA-06-0394-01	TCGA-06-0394	0
gbm_tcga	TCGA-06-0397-01	TCGA-06-0397	0
gbm_tcga_pan_can_atlas_2018	TCGA-06-0397-01	TCGA-06-0397	0
gbm_tcga_pub	TCGA-06-0397-01	TCGA-06-0397	0
gbm_tcga_pub2013	TCGA-06-0397-01	TCGA-06-0397	0
lgggbm_tcga_pub	TCGA-06-0397-01	TCGA-06-0397	0
gbm_tcga	TCGA-06-0402-01	TCGA-06-0402	0
gbm_tcga_pan_can_atlas_2018	TCGA-06-0402-01	TCGA-06-0402	0
gbm_tcga_pub	TCGA-06-0402-01	TCGA-06-0402	0
gbm_tcga_pub2013	TCGA-06-0402-01	TCGA-06-0402	0
lgggbm_tcga_pub	TCGA-06-0402-01	TCGA-06-0402	0
gbm_tcga	TCGA-06-0409-01	TCGA-06-0409	0
gbm_tcga_pan_can_atlas_2018	TCGA-06-0409-01	TCGA-06-0409	0
gbm_tcga_pub	TCGA-06-0409-01	TCGA-06-0409	0
gbm_tcga_pub2013	TCGA-06-0409-01	TCGA-06-0409	0
lgggbm_tcga_pub	TCGA-06-0409-01	TCGA-06-0409	0
gbm_tcga	TCGA-06-0410-01	TCGA-06-0410	0
gbm_tcga_pan_can_atlas_2018	TCGA-06-0410-01	TCGA-06-0410	0
gbm_tcga_pub	TCGA-06-0410-01	TCGA-06-0410	0
gbm_tcga_pub2013	TCGA-06-0410-01	TCGA-06-0410	0
lgggbm_tcga_pub	TCGA-06-0410-01	TCGA-06-0410	0
gbm_tcga	TCGA-06-0412-01	TCGA-06-0412	0
gbm_tcga_pan_can_atlas_2018	TCGA-06-0412-01	TCGA-06-0412	0
gbm_tcga_pub	TCGA-06-0412-01	TCGA-06-0412	0
gbm_tcga_pub2013	TCGA-06-0412-01	TCGA-06-0412	0
lgggbm_tcga_pub	TCGA-06-0412-01	TCGA-06-0412	0
gbm_tcga	TCGA-06-0413-01	TCGA-06-0413	0
gbm_tcga_pan_can_atlas_2018	TCGA-06-0413-01	TCGA-06-0413	0
gbm_tcga_pub	TCGA-06-0413-01	TCGA-06-0413	0
gbm_tcga_pub2013	TCGA-06-0413-01	TCGA-06-0413	0
lgggbm_tcga_pub	TCGA-06-0413-01	TCGA-06-0413	0
gbm_tcga	TCGA-06-0414-01	TCGA-06-0414	0
gbm_tcga_pan_can_atlas_2018	TCGA-06-0414-01	TCGA-06-0414	0
gbm_tcga_pub	TCGA-06-0414-01	TCGA-06-0414	0
gbm_tcga_pub2013	TCGA-06-0414-01	TCGA-06-0414	0
lgggbm_tcga_pub	TCGA-06-0414-01	TCGA-06-0414	0
gbm_tcga	TCGA-06-0644-01	TCGA-06-0644	0
gbm_tcga_pan_can_atlas_2018	TCGA-06-0644-01	TCGA-06-0644	0
gbm_tcga_pub	TCGA-06-0644-01	TCGA-06-0644	0
gbm_tcga_pub2013	TCGA-06-0644-01	TCGA-06-0644	0
lgggbm_tcga_pub	TCGA-06-0644-01	TCGA-06-0644	0
gbm_tcga	TCGA-06-0645-01	TCGA-06-0645	0
gbm_tcga_pan_can_atlas_2018	TCGA-06-0645-01	TCGA-06-0645	0
gbm_tcga_pub	TCGA-06-0645-01	TCGA-06-0645	0
gbm_tcga_pub2013	TCGA-06-0645-01	TCGA-06-0645	0
lgggbm_tcga_pub	TCGA-06-0645-01	TCGA-06-0645	0
gbm_tcga	TCGA-06-0646-01	TCGA-06-0646	0
gbm_tcga_pan_can_atlas_2018	TCGA-06-0646-01	TCGA-06-0646	0
gbm_tcga_pub	TCGA-06-0646-01	TCGA-06-0646	0
gbm_tcga_pub2013	TCGA-06-0646-01	TCGA-06-0646	0
lgggbm_tcga_pub	TCGA-06-0646-01	TCGA-06-0646	0
gbm_tcga	TCGA-06-0648-01	TCGA-06-0648	0
gbm_tcga_pan_can_atlas_2018	TCGA-06-0648-01	TCGA-06-0648	0
gbm_tcga_pub	TCGA-06-0648-01	TCGA-06-0648	0
gbm_tcga_pub2013	TCGA-06-0648-01	TCGA-06-0648	0
lgggbm_tcga_pub	TCGA-06-0648-01	TCGA-06-0648	0
gbm_tcga	TCGA-06-0649-01	TCGA-06-0649	0
gbm_tcga_pan_can_atlas_2018	TCGA-06-0649-01	TCGA-06-0649	0
gbm_tcga_pub2013	TCGA-06-0649-01	TCGA-06-0649	0
lgggbm_tcga_pub	TCGA-06-0649-01	TCGA-06-0649	0
gbm_tcga	TCGA-06-0650-01	TCGA-06-0650	0
gbm_tcga_pan_can_atlas_2018	TCGA-06-0650-01	TCGA-06-0650	0
gbm_tcga_pub2013	TCGA-06-0650-01	TCGA-06-0650	0
lgggbm_tcga_pub	TCGA-06-0650-01	TCGA-06-0650	0
gbm_tcga	TCGA-06-0686-01	TCGA-06-0686	0
gbm_tcga_pan_can_atlas_2018	TCGA-06-0686-01	TCGA-06-0686	0
gbm_tcga_pub2013	TCGA-06-0686-01	TCGA-06-0686	0
lgggbm_tcga_pub	TCGA-06-0686-01	TCGA-06-0686	0
gbm_tcga	TCGA-06-0743-01	TCGA-06-0743	0
gbm_tcga_pan_can_atlas_2018	TCGA-06-0743-01	TCGA-06-0743	0
gbm_tcga_pub2013	TCGA-06-0743-01	TCGA-06-0743	0
lgggbm_tcga_pub	TCGA-06-0743-01	TCGA-06-0743	0
gbm_tcga	TCGA-06-0744-01	TCGA-06-0744	0
gbm_tcga_pan_can_atlas_2018	TCGA-06-0744-01	TCGA-06-0744	0
gbm_tcga_pub2013	TCGA-06-0744-01	TCGA-06-0744	0
lgggbm_tcga_pub	TCGA-06-0744-01	TCGA-06-0744	0
gbm_tcga	TCGA-06-0745-01	TCGA-06-0745	0
gbm_tcga_pan_can_atlas_2018	TCGA-06-0745-01	TCGA-06-0745	0
gbm_tcga_pub2013	TCGA-06-0745-01	TCGA-06-0745	0
lgggbm_tcga_pub	TCGA-06-0745-01	TCGA-06-0745	0
gbm_tcga	TCGA-06-0747-01	TCGA-06-0747	0
gbm_tcga_pan_can_atlas_2018	TCGA-06-0747-01	TCGA-06-0747	0
gbm_tcga_pub2013	TCGA-06-0747-01	TCGA-06-0747	0
lgggbm_tcga_pub	TCGA-06-0747-01	TCGA-06-0747	0
gbm_tcga	TCGA-06-0749-01	TCGA-06-0749	0
gbm_tcga_pan_can_atlas_2018	TCGA-06-0749-01	TCGA-06-0749	0
gbm_tcga_pub2013	TCGA-06-0749-01	TCGA-06-0749	0
lgggbm_tcga_pub	TCGA-06-0749-01	TCGA-06-0749	0
gbm_tcga	TCGA-06-0750-01	TCGA-06-0750	0
gbm_tcga_pan_can_atlas_2018	TCGA-06-0750-01	TCGA-06-0750	0
gbm_tcga_pub2013	TCGA-06-0750-01	TCGA-06-0750	0
lgggbm_tcga_pub	TCGA-06-0750-01	TCGA-06-0750	0
gbm_tcga	TCGA-06-0875-01	TCGA-06-0875	0
gbm_tcga_pan_can_atlas_2018	TCGA-06-0875-01	TCGA-06-0875	0
gbm_tcga_pub2013	TCGA-06-0875-01	TCGA-06-0875	0
lgggbm_tcga_pub	TCGA-06-0875-01	TCGA-06-0875	0
gbm_tcga	TCGA-06-0876-01	TCGA-06-0876	0
gbm_tcga_pan_can_atlas_2018	TCGA-06-0876-01	TCGA-06-0876	0
gbm_tcga_pub2013	TCGA-06-0876-01	TCGA-06-0876	0
lgggbm_tcga_pub	TCGA-06-0876-01	TCGA-06-0876	0
gbm_tcga	TCGA-06-0877-01	TCGA-06-0877	0
gbm_tcga_pan_can_atlas_2018	TCGA-06-0877-01	TCGA-06-0877	0
gbm_tcga_pub2013	TCGA-06-0877-01	TCGA-06-0877	0
lgggbm_tcga_pub	TCGA-06-0877-01	TCGA-06-0877	0
gbm_tcga	TCGA-06-0878-01	TCGA-06-0878	0
gbm_tcga_pan_can_atlas_2018	TCGA-06-0878-01	TCGA-06-0878	0
gbm_tcga_pub2013	TCGA-06-0878-01	TCGA-06-0878	0
lgggbm_tcga_pub	TCGA-06-0878-01	TCGA-06-0878	0
gbm_tcga	TCGA-06-0879-01	TCGA-06-0879	0
gbm_tcga_pan_can_atlas_2018	TCGA-06-0879-01	TCGA-06-0879	0
gbm_tcga_pub2013	TCGA-06-0879-01	TCGA-06-0879	0
lgggbm_tcga_pub	TCGA-06-0879-01	TCGA-06-0879	0
gbm_tcga	TCGA-06-0881-01	TCGA-06-0881	0
gbm_tcga_pan_can_atlas_2018	TCGA-06-0881-01	TCGA-06-0881	0
gbm_tcga_pub2013	TCGA-06-0881-01	TCGA-06-0881	0
lgggbm_tcga_pub	TCGA-06-0881-01	TCGA-06-0881	0
gbm_tcga	TCGA-06-0882-01	TCGA-06-0882	0
gbm_tcga_pan_can_atlas_2018	TCGA-06-0882-01	TCGA-06-0882	0
gbm_tcga_pub2013	TCGA-06-0882-01	TCGA-06-0882	0
lgggbm_tcga_pub	TCGA-06-0882-01	TCGA-06-0882	0
gbm_tcga	TCGA-06-0939-01	TCGA-06-0939	0
gbm_tcga_pan_can_atlas_2018	TCGA-06-0939-01	TCGA-06-0939	0
gbm_tcga_pub2013	TCGA-06-0939-01	TCGA-06-0939	0
lgggbm_tcga_pub	TCGA-06-0939-01	TCGA-06-0939	0
gbm_tcga	TCGA-06-1084-01	TCGA-06-1084	0
gbm_tcga_pan_can_atlas_2018	TCGA-06-1084-01	TCGA-06-1084	0
gbm_tcga_pub2013	TCGA-06-1084-01	TCGA-06-1084	0
lgggbm_tcga_pub	TCGA-06-1084-01	TCGA-06-1084	0
gbm_tcga	TCGA-06-1086-01	TCGA-06-1086	0
gbm_tcga_pan_can_atlas_2018	TCGA-06-1086-01	TCGA-06-1086	0
gbm_tcga_pub2013	TCGA-06-1086-01	TCGA-06-1086	0
lgggbm_tcga_pub	TCGA-06-1086-01	TCGA-06-1086	0
gbm_tcga	TCGA-06-1087-01	TCGA-06-1087	0
gbm_tcga_pan_can_atlas_2018	TCGA-06-1087-01	TCGA-06-1087	0
gbm_tcga_pub2013	TCGA-06-1087-01	TCGA-06-1087	0
lgggbm_tcga_pub	TCGA-06-1087-01	TCGA-06-1087	0
gbm_tcga	TCGA-06-1800-01	TCGA-06-1800	0
gbm_tcga_pan_can_atlas_2018	TCGA-06-1800-01	TCGA-06-1800	0
gbm_tcga_pub2013	TCGA-06-1800-01	TCGA-06-1800	0
lgggbm_tcga_pub	TCGA-06-1800-01	TCGA-06-1800	0
gbm_tcga	TCGA-06-1801-01	TCGA-06-1801	0
gbm_tcga_pan_can_atlas_2018	TCGA-06-1801-01	TCGA-06-1801	0
gbm_tcga_pub2013	TCGA-06-1801-01	TCGA-06-1801	0
lgggbm_tcga_pub	TCGA-06-1801-01	TCGA-06-1801	0
gbm_tcga	TCGA-06-1802-01	TCGA-06-1802	0
gbm_tcga_pan_can_atlas_2018	TCGA-06-1802-01	TCGA-06-1802	0
gbm_tcga_pub2013	TCGA-06-1802-01	TCGA-06-1802	0
lgggbm_tcga_pub	TCGA-06-1802-01	TCGA-06-1802	0
gbm_tcga	TCGA-06-1804-01	TCGA-06-1804	0
gbm_tcga_pan_can_atlas_2018	TCGA-06-1804-01	TCGA-06-1804	0
gbm_tcga_pub2013	TCGA-06-1804-01	TCGA-06-1804	0
lgggbm_tcga_pub	TCGA-06-1804-01	TCGA-06-1804	0
gbm_tcga	TCGA-06-1805-01	TCGA-06-1805	0
gbm_tcga_pan_can_atlas_2018	TCGA-06-1805-01	TCGA-06-1805	0
gbm_tcga_pub2013	TCGA-06-1805-01	TCGA-06-1805	0
lgggbm_tcga_pub	TCGA-06-1805-01	TCGA-06-1805	0
gbm_tcga	TCGA-06-1806-01	TCGA-06-1806	0
gbm_tcga_pan_can_atlas_2018	TCGA-06-1806-01	TCGA-06-1806	0
gbm_tcga_pub2013	TCGA-06-1806-01	TCGA-06-1806	0
lgggbm_tcga_pub	TCGA-06-1806-01	TCGA-06-1806	0
gbm_tcga	TCGA-06-2557-01	TCGA-06-2557	0
gbm_tcga_pan_can_atlas_2018	TCGA-06-2557-01	TCGA-06-2557	0
gbm_tcga_pub2013	TCGA-06-2557-01	TCGA-06-2557	0
lgggbm_tcga_pub	TCGA-06-2557-01	TCGA-06-2557	0
gbm_tcga	TCGA-06-2558-01	TCGA-06-2558	0
gbm_tcga_pan_can_atlas_2018	TCGA-06-2558-01	TCGA-06-2558	0
gbm_tcga_pub2013	TCGA-06-2558-01	TCGA-06-2558	0
lgggbm_tcga_pub	TCGA-06-2558-01	TCGA-06-2558	0
gbm_tcga	TCGA-06-2559-01	TCGA-06-2559	0
gbm_tcga_pan_can_atlas_2018	TCGA-06-2559-01	TCGA-06-2559	0
gbm_tcga_pub2013	TCGA-06-2559-01	TCGA-06-2559	0
lgggbm_tcga_pub	TCGA-06-2559-01	TCGA-06-2559	0
gbm_tcga	TCGA-06-2561-01	TCGA-06-2561	0
gbm_tcga_pan_can_atlas_2018	TCGA-06-2561-01	TCGA-06-2561	0
gbm_tcga_pub2013	TCGA-06-2561-01	TCGA-06-2561	0
lgggbm_tcga_pub	TCGA-06-2561-01	TCGA-06-2561	0
gbm_tcga	TCGA-06-2562-01	TCGA-06-2562	0
gbm_tcga_pan_can_atlas_2018	TCGA-06-2562-01	TCGA-06-2562	0
gbm_tcga_pub2013	TCGA-06-2562-01	TCGA-06-2562	0
lgggbm_tcga_pub	TCGA-06-2562-01	TCGA-06-2562	0
gbm_tcga	TCGA-06-2563-01	TCGA-06-2563	0
gbm_tcga_pan_can_atlas_2018	TCGA-06-2563-01	TCGA-06-2563	0
gbm_tcga_pub2013	TCGA-06-2563-01	TCGA-06-2563	0
lgggbm_tcga_pub	TCGA-06-2563-01	TCGA-06-2563	0
gbm_tcga	TCGA-06-2564-01	TCGA-06-2564	0
gbm_tcga_pan_can_atlas_2018	TCGA-06-2564-01	TCGA-06-2564	0
gbm_tcga_pub2013	TCGA-06-2564-01	TCGA-06-2564	0
lgggbm_tcga_pub	TCGA-06-2564-01	TCGA-06-2564	0
gbm_tcga	TCGA-06-2565-01	TCGA-06-2565	0
gbm_tcga_pan_can_atlas_2018	TCGA-06-2565-01	TCGA-06-2565	0
gbm_tcga_pub2013	TCGA-06-2565-01	TCGA-06-2565	0
lgggbm_tcga_pub	TCGA-06-2565-01	TCGA-06-2565	0
gbm_tcga	TCGA-06-2566-01	TCGA-06-2566	0
gbm_tcga_pan_can_atlas_2018	TCGA-06-2566-01	TCGA-06-2566	0
gbm_tcga_pub2013	TCGA-06-2566-01	TCGA-06-2566	0
lgggbm_tcga_pub	TCGA-06-2566-01	TCGA-06-2566	0
gbm_tcga	TCGA-06-2567-01	TCGA-06-2567	0
gbm_tcga_pan_can_atlas_2018	TCGA-06-2567-01	TCGA-06-2567	0
gbm_tcga_pub2013	TCGA-06-2567-01	TCGA-06-2567	0
lgggbm_tcga_pub	TCGA-06-2567-01	TCGA-06-2567	0
gbm_tcga	TCGA-06-2569-01	TCGA-06-2569	0
gbm_tcga_pan_can_atlas_2018	TCGA-06-2569-01	TCGA-06-2569	0
lgggbm_tcga_pub	TCGA-06-2569-01	TCGA-06-2569	0
gbm_tcga	TCGA-06-2570-01	TCGA-06-2570	0
gbm_tcga_pan_can_atlas_2018	TCGA-06-2570-01	TCGA-06-2570	0
gbm_tcga_pub2013	TCGA-06-2570-01	TCGA-06-2570	0
lgggbm_tcga_pub	TCGA-06-2570-01	TCGA-06-2570	0
gbm_tcga	TCGA-06-5408-01	TCGA-06-5408	0
gbm_tcga_pan_can_atlas_2018	TCGA-06-5408-01	TCGA-06-5408	0
gbm_tcga_pub2013	TCGA-06-5408-01	TCGA-06-5408	0
lgggbm_tcga_pub	TCGA-06-5408-01	TCGA-06-5408	0
gbm_tcga	TCGA-06-5410-01	TCGA-06-5410	0
gbm_tcga_pan_can_atlas_2018	TCGA-06-5410-01	TCGA-06-5410	0
gbm_tcga_pub2013	TCGA-06-5410-01	TCGA-06-5410	0
lgggbm_tcga_pub	TCGA-06-5410-01	TCGA-06-5410	0
gbm_tcga	TCGA-06-5411-01	TCGA-06-5411	0
gbm_tcga_pan_can_atlas_2018	TCGA-06-5411-01	TCGA-06-5411	0
gbm_tcga_pub2013	TCGA-06-5411-01	TCGA-06-5411	0
lgggbm_tcga_pub	TCGA-06-5411-01	TCGA-06-5411	0
gbm_tcga	TCGA-06-5412-01	TCGA-06-5412	0
gbm_tcga_pan_can_atlas_2018	TCGA-06-5412-01	TCGA-06-5412	0
gbm_tcga_pub2013	TCGA-06-5412-01	TCGA-06-5412	0
lgggbm_tcga_pub	TCGA-06-5412-01	TCGA-06-5412	0
gbm_tcga	TCGA-06-5413-01	TCGA-06-5413	0
gbm_tcga_pan_can_atlas_2018	TCGA-06-5413-01	TCGA-06-5413	0
gbm_tcga_pub2013	TCGA-06-5413-01	TCGA-06-5413	0
lgggbm_tcga_pub	TCGA-06-5413-01	TCGA-06-5413	0
gbm_tcga	TCGA-06-5414-01	TCGA-06-5414	0
gbm_tcga_pan_can_atlas_2018	TCGA-06-5414-01	TCGA-06-5414	0
gbm_tcga_pub2013	TCGA-06-5414-01	TCGA-06-5414	0
lgggbm_tcga_pub	TCGA-06-5414-01	TCGA-06-5414	0
gbm_tcga	TCGA-06-5415-01	TCGA-06-5415	0
gbm_tcga_pan_can_atlas_2018	TCGA-06-5415-01	TCGA-06-5415	0
gbm_tcga_pub2013	TCGA-06-5415-01	TCGA-06-5415	0
lgggbm_tcga_pub	TCGA-06-5415-01	TCGA-06-5415	0
gbm_tcga	TCGA-06-5416-01	TCGA-06-5416	0
gbm_tcga_pan_can_atlas_2018	TCGA-06-5416-01	TCGA-06-5416	0
gbm_tcga_pub2013	TCGA-06-5416-01	TCGA-06-5416	0
lgggbm_tcga_pub	TCGA-06-5416-01	TCGA-06-5416	0
gbm_tcga	TCGA-06-5417-01	TCGA-06-5417	0
gbm_tcga_pan_can_atlas_2018	TCGA-06-5417-01	TCGA-06-5417	0
gbm_tcga_pub2013	TCGA-06-5417-01	TCGA-06-5417	0
lgggbm_tcga_pub	TCGA-06-5417-01	TCGA-06-5417	0
gbm_tcga	TCGA-06-5418-01	TCGA-06-5418	0
gbm_tcga_pan_can_atlas_2018	TCGA-06-5418-01	TCGA-06-5418	0
gbm_tcga_pub2013	TCGA-06-5418-01	TCGA-06-5418	0
lgggbm_tcga_pub	TCGA-06-5418-01	TCGA-06-5418	0
gbm_tcga	TCGA-06-5856-01	TCGA-06-5856	0
gbm_tcga_pan_can_atlas_2018	TCGA-06-5856-01	TCGA-06-5856	0
gbm_tcga_pub2013	TCGA-06-5856-01	TCGA-06-5856	0
lgggbm_tcga_pub	TCGA-06-5856-01	TCGA-06-5856	0
gbm_tcga	TCGA-06-5858-01	TCGA-06-5858	0
gbm_tcga_pan_can_atlas_2018	TCGA-06-5858-01	TCGA-06-5858	0
gbm_tcga_pub2013	TCGA-06-5858-01	TCGA-06-5858	0
lgggbm_tcga_pub	TCGA-06-5858-01	TCGA-06-5858	0
gbm_tcga	TCGA-06-5859-01	TCGA-06-5859	0
gbm_tcga_pan_can_atlas_2018	TCGA-06-5859-01	TCGA-06-5859	0
gbm_tcga_pub2013	TCGA-06-5859-01	TCGA-06-5859	0
lgggbm_tcga_pub	TCGA-06-5859-01	TCGA-06-5859	0
gbm_tcga	TCGA-06-6388-01	TCGA-06-6388	0
gbm_tcga_pan_can_atlas_2018	TCGA-06-6388-01	TCGA-06-6388	0
gbm_tcga_pub2013	TCGA-06-6388-01	TCGA-06-6388	0
lgggbm_tcga_pub	TCGA-06-6388-01	TCGA-06-6388	0
gbm_tcga	TCGA-06-6389-01	TCGA-06-6389	0
gbm_tcga_pan_can_atlas_2018	TCGA-06-6389-01	TCGA-06-6389	0
gbm_tcga_pub2013	TCGA-06-6389-01	TCGA-06-6389	0
lgggbm_tcga_pub	TCGA-06-6389-01	TCGA-06-6389	0
gbm_tcga	TCGA-06-6390-01	TCGA-06-6390	0
gbm_tcga_pan_can_atlas_2018	TCGA-06-6390-01	TCGA-06-6390	0
gbm_tcga_pub2013	TCGA-06-6390-01	TCGA-06-6390	0
lgggbm_tcga_pub	TCGA-06-6390-01	TCGA-06-6390	0
gbm_tcga	TCGA-06-6391-01	TCGA-06-6391	0
gbm_tcga_pub2013	TCGA-06-6391-01	TCGA-06-6391	0
lgggbm_tcga_pub	TCGA-06-6391-01	TCGA-06-6391	0
gbm_tcga	TCGA-06-6693-01	TCGA-06-6693	0
gbm_tcga_pan_can_atlas_2018	TCGA-06-6693-01	TCGA-06-6693	0
gbm_tcga_pub2013	TCGA-06-6693-01	TCGA-06-6693	0
lgggbm_tcga_pub	TCGA-06-6693-01	TCGA-06-6693	0
gbm_tcga	TCGA-06-6694-01	TCGA-06-6694	0
gbm_tcga_pan_can_atlas_2018	TCGA-06-6694-01	TCGA-06-6694	0
gbm_tcga_pub2013	TCGA-06-6694-01	TCGA-06-6694	0
lgggbm_tcga_pub	TCGA-06-6694-01	TCGA-06-6694	0
gbm_tcga	TCGA-06-6695-01	TCGA-06-6695	0
gbm_tcga_pan_can_atlas_2018	TCGA-06-6695-01	TCGA-06-6695	0
gbm_tcga_pub2013	TCGA-06-6695-01	TCGA-06-6695	0
lgggbm_tcga_pub	TCGA-06-6695-01	TCGA-06-6695	0
gbm_tcga	TCGA-06-6697-01	TCGA-06-6697	0
gbm_tcga_pan_can_atlas_2018	TCGA-06-6697-01	TCGA-06-6697	0
gbm_tcga_pub2013	TCGA-06-6697-01	TCGA-06-6697	0
lgggbm_tcga_pub	TCGA-06-6697-01	TCGA-06-6697	0
gbm_tcga	TCGA-06-6698-01	TCGA-06-6698	0
gbm_tcga_pan_can_atlas_2018	TCGA-06-6698-01	TCGA-06-6698	0
gbm_tcga_pub2013	TCGA-06-6698-01	TCGA-06-6698	0
lgggbm_tcga_pub	TCGA-06-6698-01	TCGA-06-6698	0
gbm_tcga	TCGA-06-6699-01	TCGA-06-6699	0
gbm_tcga_pan_can_atlas_2018	TCGA-06-6699-01	TCGA-06-6699	0
gbm_tcga_pub2013	TCGA-06-6699-01	TCGA-06-6699	0
lgggbm_tcga_pub	TCGA-06-6699-01	TCGA-06-6699	0
gbm_tcga	TCGA-06-6700-01	TCGA-06-6700	0
gbm_tcga_pan_can_atlas_2018	TCGA-06-6700-01	TCGA-06-6700	0
gbm_tcga_pub2013	TCGA-06-6700-01	TCGA-06-6700	0
lgggbm_tcga_pub	TCGA-06-6700-01	TCGA-06-6700	0
gbm_tcga	TCGA-06-6701-01	TCGA-06-6701	0
gbm_tcga_pan_can_atlas_2018	TCGA-06-6701-01	TCGA-06-6701	0
gbm_tcga_pub2013	TCGA-06-6701-01	TCGA-06-6701	0
lgggbm_tcga_pub	TCGA-06-6701-01	TCGA-06-6701	0
gbm_tcga	TCGA-06-A5U0-01	TCGA-06-A5U0	0
gbm_tcga_pan_can_atlas_2018	TCGA-06-A5U0-01	TCGA-06-A5U0	0
lgggbm_tcga_pub	TCGA-06-A5U0-01	TCGA-06-A5U0	0
gbm_tcga	TCGA-06-A5U1-01	TCGA-06-A5U1	0
gbm_tcga_pan_can_atlas_2018	TCGA-06-A5U1-01	TCGA-06-A5U1	0
lgggbm_tcga_pub	TCGA-06-A5U1-01	TCGA-06-A5U1	0
gbm_tcga	TCGA-06-A6S0-01	TCGA-06-A6S0	0
gbm_tcga_pan_can_atlas_2018	TCGA-06-A6S0-01	TCGA-06-A6S0	0
lgggbm_tcga_pub	TCGA-06-A6S0-01	TCGA-06-A6S0	0
gbm_tcga	TCGA-06-A6S1-01	TCGA-06-A6S1	0
gbm_tcga_pan_can_atlas_2018	TCGA-06-A6S1-01	TCGA-06-A6S1	0
lgggbm_tcga_pub	TCGA-06-A6S1-01	TCGA-06-A6S1	0
gbm_tcga	TCGA-06-A7TK-01	TCGA-06-A7TK	0
gbm_tcga_pan_can_atlas_2018	TCGA-06-A7TK-01	TCGA-06-A7TK	0
lgggbm_tcga_pub	TCGA-06-A7TK-01	TCGA-06-A7TK	0
gbm_tcga	TCGA-06-A7TL-01	TCGA-06-A7TL	0
gbm_tcga_pan_can_atlas_2018	TCGA-06-A7TL-01	TCGA-06-A7TL	0
lgggbm_tcga_pub	TCGA-06-A7TL-01	TCGA-06-A7TL	0
gbm_tcga	TCGA-08-0244-01	TCGA-08-0244	0
gbm_tcga_pan_can_atlas_2018	TCGA-08-0244-01	TCGA-08-0244	0
gbm_tcga_pub	TCGA-08-0244-01	TCGA-08-0244	0
gbm_tcga_pub2013	TCGA-08-0244-01	TCGA-08-0244	0
lgggbm_tcga_pub	TCGA-08-0244-01	TCGA-08-0244	0
gbm_tcga	TCGA-08-0245-01	TCGA-08-0245	0
gbm_tcga_pan_can_atlas_2018	TCGA-08-0245-01	TCGA-08-0245	0
gbm_tcga_pub2013	TCGA-08-0245-01	TCGA-08-0245	0
lgggbm_tcga_pub	TCGA-08-0245-01	TCGA-08-0245	0
gbm_tcga	TCGA-08-0246-01	TCGA-08-0246	0
gbm_tcga_pan_can_atlas_2018	TCGA-08-0246-01	TCGA-08-0246	0
gbm_tcga_pub	TCGA-08-0246-01	TCGA-08-0246	0
gbm_tcga_pub2013	TCGA-08-0246-01	TCGA-08-0246	0
lgggbm_tcga_pub	TCGA-08-0246-01	TCGA-08-0246	0
gbm_tcga	TCGA-08-0344-01	TCGA-08-0344	0
gbm_tcga_pan_can_atlas_2018	TCGA-08-0344-01	TCGA-08-0344	0
gbm_tcga_pub	TCGA-08-0344-01	TCGA-08-0344	0
gbm_tcga_pub2013	TCGA-08-0344-01	TCGA-08-0344	0
lgggbm_tcga_pub	TCGA-08-0344-01	TCGA-08-0344	0
gbm_tcga	TCGA-08-0345-01	TCGA-08-0345	0
gbm_tcga_pan_can_atlas_2018	TCGA-08-0345-01	TCGA-08-0345	0
gbm_tcga_pub	TCGA-08-0345-01	TCGA-08-0345	0
gbm_tcga_pub2013	TCGA-08-0345-01	TCGA-08-0345	0
lgggbm_tcga_pub	TCGA-08-0345-01	TCGA-08-0345	0
gbm_tcga	TCGA-08-0346-01	TCGA-08-0346	0
gbm_tcga_pan_can_atlas_2018	TCGA-08-0346-01	TCGA-08-0346	0
gbm_tcga_pub	TCGA-08-0346-01	TCGA-08-0346	0
gbm_tcga_pub2013	TCGA-08-0346-01	TCGA-08-0346	0
lgggbm_tcga_pub	TCGA-08-0346-01	TCGA-08-0346	0
gbm_tcga	TCGA-08-0347-01	TCGA-08-0347	0
gbm_tcga_pan_can_atlas_2018	TCGA-08-0347-01	TCGA-08-0347	0
gbm_tcga_pub	TCGA-08-0347-01	TCGA-08-0347	0
gbm_tcga_pub2013	TCGA-08-0347-01	TCGA-08-0347	0
lgggbm_tcga_pub	TCGA-08-0347-01	TCGA-08-0347	0
gbm_tcga	TCGA-08-0348-01	TCGA-08-0348	0
gbm_tcga_pan_can_atlas_2018	TCGA-08-0348-01	TCGA-08-0348	0
gbm_tcga_pub	TCGA-08-0348-01	TCGA-08-0348	0
gbm_tcga_pub2013	TCGA-08-0348-01	TCGA-08-0348	0
lgggbm_tcga_pub	TCGA-08-0348-01	TCGA-08-0348	0
gbm_tcga	TCGA-08-0349-01	TCGA-08-0349	0
gbm_tcga_pan_can_atlas_2018	TCGA-08-0349-01	TCGA-08-0349	0
gbm_tcga_pub	TCGA-08-0349-01	TCGA-08-0349	0
gbm_tcga_pub2013	TCGA-08-0349-01	TCGA-08-0349	0
lgggbm_tcga_pub	TCGA-08-0349-01	TCGA-08-0349	0
gbm_tcga	TCGA-08-0350-01	TCGA-08-0350	0
gbm_tcga_pan_can_atlas_2018	TCGA-08-0350-01	TCGA-08-0350	0
gbm_tcga_pub	TCGA-08-0350-01	TCGA-08-0350	0
gbm_tcga_pub2013	TCGA-08-0350-01	TCGA-08-0350	0
lgggbm_tcga_pub	TCGA-08-0350-01	TCGA-08-0350	0
gbm_tcga	TCGA-08-0351-01	TCGA-08-0351	0
gbm_tcga_pan_can_atlas_2018	TCGA-08-0351-01	TCGA-08-0351	0
gbm_tcga_pub	TCGA-08-0351-01	TCGA-08-0351	0
gbm_tcga_pub2013	TCGA-08-0351-01	TCGA-08-0351	0
lgggbm_tcga_pub	TCGA-08-0351-01	TCGA-08-0351	0
gbm_tcga	TCGA-08-0352-01	TCGA-08-0352	0
gbm_tcga_pan_can_atlas_2018	TCGA-08-0352-01	TCGA-08-0352	0
gbm_tcga_pub	TCGA-08-0352-01	TCGA-08-0352	0
gbm_tcga_pub2013	TCGA-08-0352-01	TCGA-08-0352	0
lgggbm_tcga_pub	TCGA-08-0352-01	TCGA-08-0352	0
gbm_tcga	TCGA-08-0353-01	TCGA-08-0353	0
gbm_tcga_pan_can_atlas_2018	TCGA-08-0353-01	TCGA-08-0353	0
gbm_tcga_pub	TCGA-08-0353-01	TCGA-08-0353	0
gbm_tcga_pub2013	TCGA-08-0353-01	TCGA-08-0353	0
lgggbm_tcga_pub	TCGA-08-0353-01	TCGA-08-0353	0
gbm_tcga	TCGA-08-0354-01	TCGA-08-0354	0
gbm_tcga_pan_can_atlas_2018	TCGA-08-0354-01	TCGA-08-0354	0
gbm_tcga_pub	TCGA-08-0354-01	TCGA-08-0354	0
gbm_tcga_pub2013	TCGA-08-0354-01	TCGA-08-0354	0
lgggbm_tcga_pub	TCGA-08-0354-01	TCGA-08-0354	0
gbm_tcga	TCGA-08-0355-01	TCGA-08-0355	0
gbm_tcga_pan_can_atlas_2018	TCGA-08-0355-01	TCGA-08-0355	0
gbm_tcga_pub	TCGA-08-0355-01	TCGA-08-0355	0
gbm_tcga_pub2013	TCGA-08-0355-01	TCGA-08-0355	0
lgggbm_tcga_pub	TCGA-08-0355-01	TCGA-08-0355	0
gbm_tcga	TCGA-08-0356-01	TCGA-08-0356	0
gbm_tcga_pan_can_atlas_2018	TCGA-08-0356-01	TCGA-08-0356	0
gbm_tcga_pub	TCGA-08-0356-01	TCGA-08-0356	0
gbm_tcga_pub2013	TCGA-08-0356-01	TCGA-08-0356	0
lgggbm_tcga_pub	TCGA-08-0356-01	TCGA-08-0356	0
gbm_tcga	TCGA-08-0357-01	TCGA-08-0357	0
gbm_tcga_pan_can_atlas_2018	TCGA-08-0357-01	TCGA-08-0357	0
gbm_tcga_pub	TCGA-08-0357-01	TCGA-08-0357	0
gbm_tcga_pub2013	TCGA-08-0357-01	TCGA-08-0357	0
lgggbm_tcga_pub	TCGA-08-0357-01	TCGA-08-0357	0
gbm_tcga	TCGA-08-0358-01	TCGA-08-0358	0
gbm_tcga_pan_can_atlas_2018	TCGA-08-0358-01	TCGA-08-0358	0
gbm_tcga_pub	TCGA-08-0358-01	TCGA-08-0358	0
gbm_tcga_pub2013	TCGA-08-0358-01	TCGA-08-0358	0
lgggbm_tcga_pub	TCGA-08-0358-01	TCGA-08-0358	0
gbm_tcga	TCGA-08-0359-01	TCGA-08-0359	0
gbm_tcga_pan_can_atlas_2018	TCGA-08-0359-01	TCGA-08-0359	0
gbm_tcga_pub	TCGA-08-0359-01	TCGA-08-0359	0
gbm_tcga_pub2013	TCGA-08-0359-01	TCGA-08-0359	0
lgggbm_tcga_pub	TCGA-08-0359-01	TCGA-08-0359	0
gbm_tcga	TCGA-08-0360-01	TCGA-08-0360	0
gbm_tcga_pub	TCGA-08-0360-01	TCGA-08-0360	0
gbm_tcga_pub2013	TCGA-08-0360-01	TCGA-08-0360	0
lgggbm_tcga_pub	TCGA-08-0360-01	TCGA-08-0360	0
gbm_tcga	TCGA-08-0373-01	TCGA-08-0373	0
gbm_tcga_pub	TCGA-08-0373-01	TCGA-08-0373	0
gbm_tcga_pub2013	TCGA-08-0373-01	TCGA-08-0373	0
lgggbm_tcga_pub	TCGA-08-0373-01	TCGA-08-0373	0
gbm_tcga	TCGA-08-0375-01	TCGA-08-0375	0
gbm_tcga_pan_can_atlas_2018	TCGA-08-0375-01	TCGA-08-0375	0
gbm_tcga_pub	TCGA-08-0375-01	TCGA-08-0375	0
gbm_tcga_pub2013	TCGA-08-0375-01	TCGA-08-0375	0
lgggbm_tcga_pub	TCGA-08-0375-01	TCGA-08-0375	0
gbm_tcga	TCGA-08-0380-01	TCGA-08-0380	0
gbm_tcga_pan_can_atlas_2018	TCGA-08-0380-01	TCGA-08-0380	0
gbm_tcga_pub	TCGA-08-0380-01	TCGA-08-0380	0
gbm_tcga_pub2013	TCGA-08-0380-01	TCGA-08-0380	0
lgggbm_tcga_pub	TCGA-08-0380-01	TCGA-08-0380	0
gbm_tcga	TCGA-08-0385-01	TCGA-08-0385	0
gbm_tcga_pub	TCGA-08-0385-01	TCGA-08-0385	0
gbm_tcga_pub2013	TCGA-08-0385-01	TCGA-08-0385	0
lgggbm_tcga_pub	TCGA-08-0385-01	TCGA-08-0385	0
gbm_tcga	TCGA-08-0386-01	TCGA-08-0386	0
gbm_tcga_pan_can_atlas_2018	TCGA-08-0386-01	TCGA-08-0386	0
gbm_tcga_pub	TCGA-08-0386-01	TCGA-08-0386	0
gbm_tcga_pub2013	TCGA-08-0386-01	TCGA-08-0386	0
lgggbm_tcga_pub	TCGA-08-0386-01	TCGA-08-0386	0
gbm_tcga	TCGA-08-0389-01	TCGA-08-0389	0
gbm_tcga_pan_can_atlas_2018	TCGA-08-0389-01	TCGA-08-0389	0
gbm_tcga_pub	TCGA-08-0389-01	TCGA-08-0389	0
gbm_tcga_pub2013	TCGA-08-0389-01	TCGA-08-0389	0
lgggbm_tcga_pub	TCGA-08-0389-01	TCGA-08-0389	0
gbm_tcga	TCGA-08-0390-01	TCGA-08-0390	0
gbm_tcga_pan_can_atlas_2018	TCGA-08-0390-01	TCGA-08-0390	0
gbm_tcga_pub	TCGA-08-0390-01	TCGA-08-0390	0
gbm_tcga_pub2013	TCGA-08-0390-01	TCGA-08-0390	0
lgggbm_tcga_pub	TCGA-08-0390-01	TCGA-08-0390	0
gbm_tcga	TCGA-08-0392-01	TCGA-08-0392	0
gbm_tcga_pan_can_atlas_2018	TCGA-08-0392-01	TCGA-08-0392	0
gbm_tcga_pub	TCGA-08-0392-01	TCGA-08-0392	0
gbm_tcga_pub2013	TCGA-08-0392-01	TCGA-08-0392	0
lgggbm_tcga_pub	TCGA-08-0392-01	TCGA-08-0392	0
gbm_tcga	TCGA-08-0509-01	TCGA-08-0509	0
gbm_tcga_pan_can_atlas_2018	TCGA-08-0509-01	TCGA-08-0509	0
gbm_tcga_pub	TCGA-08-0509-01	TCGA-08-0509	0
gbm_tcga_pub2013	TCGA-08-0509-01	TCGA-08-0509	0
lgggbm_tcga_pub	TCGA-08-0509-01	TCGA-08-0509	0
gbm_tcga	TCGA-08-0510-01	TCGA-08-0510	0
gbm_tcga_pan_can_atlas_2018	TCGA-08-0510-01	TCGA-08-0510	0
gbm_tcga_pub	TCGA-08-0510-01	TCGA-08-0510	0
gbm_tcga_pub2013	TCGA-08-0510-01	TCGA-08-0510	0
lgggbm_tcga_pub	TCGA-08-0510-01	TCGA-08-0510	0
gbm_tcga_pub	TCGA-08-0511-01	TCGA-08-0511	0
gbm_tcga_pub2013	TCGA-08-0511-01	TCGA-08-0511	0
lgggbm_tcga_pub	TCGA-08-0511-01	TCGA-08-0511	0
gbm_tcga	TCGA-08-0512-01	TCGA-08-0512	0
gbm_tcga_pan_can_atlas_2018	TCGA-08-0512-01	TCGA-08-0512	0
gbm_tcga_pub	TCGA-08-0512-01	TCGA-08-0512	0
gbm_tcga_pub2013	TCGA-08-0512-01	TCGA-08-0512	0
lgggbm_tcga_pub	TCGA-08-0512-01	TCGA-08-0512	0
gbm_tcga	TCGA-08-0514-01	TCGA-08-0514	0
gbm_tcga_pan_can_atlas_2018	TCGA-08-0514-01	TCGA-08-0514	0
gbm_tcga_pub	TCGA-08-0514-01	TCGA-08-0514	0
gbm_tcga_pub2013	TCGA-08-0514-01	TCGA-08-0514	0
lgggbm_tcga_pub	TCGA-08-0514-01	TCGA-08-0514	0
gbm_tcga	TCGA-08-0516-01	TCGA-08-0516	0
gbm_tcga_pan_can_atlas_2018	TCGA-08-0516-01	TCGA-08-0516	0
gbm_tcga_pub	TCGA-08-0516-01	TCGA-08-0516	0
gbm_tcga_pub2013	TCGA-08-0516-01	TCGA-08-0516	0
lgggbm_tcga_pub	TCGA-08-0516-01	TCGA-08-0516	0
gbm_tcga	TCGA-08-0517-01	TCGA-08-0517	0
gbm_tcga_pan_can_atlas_2018	TCGA-08-0517-01	TCGA-08-0517	0
gbm_tcga_pub	TCGA-08-0517-01	TCGA-08-0517	0
gbm_tcga_pub2013	TCGA-08-0517-01	TCGA-08-0517	0
lgggbm_tcga_pub	TCGA-08-0517-01	TCGA-08-0517	0
gbm_tcga	TCGA-08-0518-01	TCGA-08-0518	0
gbm_tcga_pan_can_atlas_2018	TCGA-08-0518-01	TCGA-08-0518	0
gbm_tcga_pub	TCGA-08-0518-01	TCGA-08-0518	0
gbm_tcga_pub2013	TCGA-08-0518-01	TCGA-08-0518	0
lgggbm_tcga_pub	TCGA-08-0518-01	TCGA-08-0518	0
gbm_tcga	TCGA-08-0520-01	TCGA-08-0520	0
gbm_tcga_pan_can_atlas_2018	TCGA-08-0520-01	TCGA-08-0520	0
gbm_tcga_pub	TCGA-08-0520-01	TCGA-08-0520	0
gbm_tcga_pub2013	TCGA-08-0520-01	TCGA-08-0520	0
lgggbm_tcga_pub	TCGA-08-0520-01	TCGA-08-0520	0
gbm_tcga	TCGA-08-0521-01	TCGA-08-0521	0
gbm_tcga_pan_can_atlas_2018	TCGA-08-0521-01	TCGA-08-0521	0
gbm_tcga_pub	TCGA-08-0521-01	TCGA-08-0521	0
gbm_tcga_pub2013	TCGA-08-0521-01	TCGA-08-0521	0
lgggbm_tcga_pub	TCGA-08-0521-01	TCGA-08-0521	0
gbm_tcga_pub	TCGA-08-0522-01	TCGA-08-0522	0
gbm_tcga_pub2013	TCGA-08-0522-01	TCGA-08-0522	0
lgggbm_tcga_pub	TCGA-08-0522-01	TCGA-08-0522	0
gbm_tcga	TCGA-08-0524-01	TCGA-08-0524	0
gbm_tcga_pan_can_atlas_2018	TCGA-08-0524-01	TCGA-08-0524	0
gbm_tcga_pub	TCGA-08-0524-01	TCGA-08-0524	0
gbm_tcga_pub2013	TCGA-08-0524-01	TCGA-08-0524	0
lgggbm_tcga_pub	TCGA-08-0524-01	TCGA-08-0524	0
gbm_tcga	TCGA-08-0525-01	TCGA-08-0525	0
gbm_tcga_pan_can_atlas_2018	TCGA-08-0525-01	TCGA-08-0525	0
gbm_tcga_pub	TCGA-08-0525-01	TCGA-08-0525	0
gbm_tcga_pub2013	TCGA-08-0525-01	TCGA-08-0525	0
lgggbm_tcga_pub	TCGA-08-0525-01	TCGA-08-0525	0
gbm_tcga	TCGA-08-0529-01	TCGA-08-0529	0
gbm_tcga_pan_can_atlas_2018	TCGA-08-0529-01	TCGA-08-0529	0
gbm_tcga_pub	TCGA-08-0529-01	TCGA-08-0529	0
gbm_tcga_pub2013	TCGA-08-0529-01	TCGA-08-0529	0
lgggbm_tcga_pub	TCGA-08-0529-01	TCGA-08-0529	0
gbm_tcga	TCGA-08-0531-01	TCGA-08-0531	0
gbm_tcga_pan_can_atlas_2018	TCGA-08-0531-01	TCGA-08-0531	0
gbm_tcga_pub	TCGA-08-0531-01	TCGA-08-0531	0
gbm_tcga_pub2013	TCGA-08-0531-01	TCGA-08-0531	0
lgggbm_tcga_pub	TCGA-08-0531-01	TCGA-08-0531	0
gbm_tcga	TCGA-12-0615-01	TCGA-12-0615	0
gbm_tcga_pan_can_atlas_2018	TCGA-12-0615-01	TCGA-12-0615	0
gbm_tcga_pub	TCGA-12-0615-01	TCGA-12-0615	0
gbm_tcga_pub2013	TCGA-12-0615-01	TCGA-12-0615	0
lgggbm_tcga_pub	TCGA-12-0615-01	TCGA-12-0615	0
gbm_tcga	TCGA-12-0616-01	TCGA-12-0616	0
gbm_tcga_pan_can_atlas_2018	TCGA-12-0616-01	TCGA-12-0616	0
gbm_tcga_pub	TCGA-12-0616-01	TCGA-12-0616	0
gbm_tcga_pub2013	TCGA-12-0616-01	TCGA-12-0616	0
lgggbm_tcga_pub	TCGA-12-0616-01	TCGA-12-0616	0
gbm_tcga	TCGA-12-0618-01	TCGA-12-0618	0
gbm_tcga_pan_can_atlas_2018	TCGA-12-0618-01	TCGA-12-0618	0
gbm_tcga_pub	TCGA-12-0618-01	TCGA-12-0618	0
gbm_tcga_pub2013	TCGA-12-0618-01	TCGA-12-0618	0
lgggbm_tcga_pub	TCGA-12-0618-01	TCGA-12-0618	0
gbm_tcga	TCGA-12-0619-01	TCGA-12-0619	0
gbm_tcga_pan_can_atlas_2018	TCGA-12-0619-01	TCGA-12-0619	0
gbm_tcga_pub	TCGA-12-0619-01	TCGA-12-0619	0
gbm_tcga_pub2013	TCGA-12-0619-01	TCGA-12-0619	0
lgggbm_tcga_pub	TCGA-12-0619-01	TCGA-12-0619	0
gbm_tcga	TCGA-12-0620-01	TCGA-12-0620	0
gbm_tcga_pan_can_atlas_2018	TCGA-12-0620-01	TCGA-12-0620	0
gbm_tcga_pub	TCGA-12-0620-01	TCGA-12-0620	0
gbm_tcga_pub2013	TCGA-12-0620-01	TCGA-12-0620	0
lgggbm_tcga_pub	TCGA-12-0620-01	TCGA-12-0620	0
gbm_tcga_pub2013	TCGA-12-0653-01	TCGA-12-0653	0
lgggbm_tcga_pub	TCGA-12-0653-01	TCGA-12-0653	0
gbm_tcga	TCGA-12-0654-01	TCGA-12-0654	0
gbm_tcga_pan_can_atlas_2018	TCGA-12-0654-01	TCGA-12-0654	0
gbm_tcga_pub2013	TCGA-12-0654-01	TCGA-12-0654	0
lgggbm_tcga_pub	TCGA-12-0654-01	TCGA-12-0654	0
gbm_tcga	TCGA-12-0656-01	TCGA-12-0656	0
gbm_tcga_pan_can_atlas_2018	TCGA-12-0656-01	TCGA-12-0656	0
gbm_tcga_pub2013	TCGA-12-0656-01	TCGA-12-0656	0
lgggbm_tcga_pub	TCGA-12-0656-01	TCGA-12-0656	0
gbm_tcga	TCGA-12-0657-01	TCGA-12-0657	0
gbm_tcga_pan_can_atlas_2018	TCGA-12-0657-01	TCGA-12-0657	0
gbm_tcga_pub2013	TCGA-12-0657-01	TCGA-12-0657	0
lgggbm_tcga_pub	TCGA-12-0657-01	TCGA-12-0657	0
gbm_tcga	TCGA-12-0662-01	TCGA-12-0662	0
gbm_tcga_pan_can_atlas_2018	TCGA-12-0662-01	TCGA-12-0662	0
gbm_tcga_pub2013	TCGA-12-0662-01	TCGA-12-0662	0
lgggbm_tcga_pub	TCGA-12-0662-01	TCGA-12-0662	0
gbm_tcga	TCGA-12-0670-01	TCGA-12-0670	0
gbm_tcga_pan_can_atlas_2018	TCGA-12-0670-01	TCGA-12-0670	0
gbm_tcga_pub2013	TCGA-12-0670-01	TCGA-12-0670	0
lgggbm_tcga_pub	TCGA-12-0670-01	TCGA-12-0670	0
gbm_tcga	TCGA-12-0688-01	TCGA-12-0688	0
gbm_tcga_pan_can_atlas_2018	TCGA-12-0688-01	TCGA-12-0688	0
gbm_tcga_pub2013	TCGA-12-0688-01	TCGA-12-0688	0
lgggbm_tcga_pub	TCGA-12-0688-01	TCGA-12-0688	0
lgggbm_tcga_pub	TCGA-12-0691-01	TCGA-12-0691	0
gbm_tcga	TCGA-12-0692-01	TCGA-12-0692	0
gbm_tcga_pan_can_atlas_2018	TCGA-12-0692-01	TCGA-12-0692	0
gbm_tcga_pub2013	TCGA-12-0692-01	TCGA-12-0692	0
lgggbm_tcga_pub	TCGA-12-0692-01	TCGA-12-0692	0
gbm_tcga	TCGA-12-0703-01	TCGA-12-0703	0
gbm_tcga_pan_can_atlas_2018	TCGA-12-0703-01	TCGA-12-0703	0
gbm_tcga_pub2013	TCGA-12-0703-01	TCGA-12-0703	0
lgggbm_tcga_pub	TCGA-12-0703-01	TCGA-12-0703	0
gbm_tcga	TCGA-12-0707-01	TCGA-12-0707	0
gbm_tcga_pan_can_atlas_2018	TCGA-12-0707-01	TCGA-12-0707	0
gbm_tcga_pub2013	TCGA-12-0707-01	TCGA-12-0707	0
lgggbm_tcga_pub	TCGA-12-0707-01	TCGA-12-0707	0
gbm_tcga	TCGA-12-0769-01	TCGA-12-0769	0
gbm_tcga_pan_can_atlas_2018	TCGA-12-0769-01	TCGA-12-0769	0
gbm_tcga_pub2013	TCGA-12-0769-01	TCGA-12-0769	0
lgggbm_tcga_pub	TCGA-12-0769-01	TCGA-12-0769	0
gbm_tcga	TCGA-12-0772-01	TCGA-12-0772	0
gbm_tcga_pan_can_atlas_2018	TCGA-12-0772-01	TCGA-12-0772	0
gbm_tcga_pub2013	TCGA-12-0772-01	TCGA-12-0772	0
lgggbm_tcga_pub	TCGA-12-0772-01	TCGA-12-0772	0
gbm_tcga	TCGA-12-0773-01	TCGA-12-0773	0
gbm_tcga_pan_can_atlas_2018	TCGA-12-0773-01	TCGA-12-0773	0
gbm_tcga_pub2013	TCGA-12-0773-01	TCGA-12-0773	0
lgggbm_tcga_pub	TCGA-12-0773-01	TCGA-12-0773	0
gbm_tcga	TCGA-12-0775-01	TCGA-12-0775	0
gbm_tcga_pan_can_atlas_2018	TCGA-12-0775-01	TCGA-12-0775	0
gbm_tcga_pub2013	TCGA-12-0775-01	TCGA-12-0775	0
lgggbm_tcga_pub	TCGA-12-0775-01	TCGA-12-0775	0
gbm_tcga	TCGA-12-0776-01	TCGA-12-0776	0
gbm_tcga_pan_can_atlas_2018	TCGA-12-0776-01	TCGA-12-0776	0
gbm_tcga_pub2013	TCGA-12-0776-01	TCGA-12-0776	0
lgggbm_tcga_pub	TCGA-12-0776-01	TCGA-12-0776	0
gbm_tcga_pan_can_atlas_2018	TCGA-12-0778-01	TCGA-12-0778	0
lgggbm_tcga_pub	TCGA-12-0778-01	TCGA-12-0778	0
gbm_tcga	TCGA-12-0780-01	TCGA-12-0780	0
gbm_tcga_pan_can_atlas_2018	TCGA-12-0780-01	TCGA-12-0780	0
gbm_tcga_pub2013	TCGA-12-0780-01	TCGA-12-0780	0
lgggbm_tcga_pub	TCGA-12-0780-01	TCGA-12-0780	0
gbm_tcga	TCGA-12-0818-01	TCGA-12-0818	0
gbm_tcga_pan_can_atlas_2018	TCGA-12-0818-01	TCGA-12-0818	0
gbm_tcga_pub2013	TCGA-12-0818-01	TCGA-12-0818	0
lgggbm_tcga_pub	TCGA-12-0818-01	TCGA-12-0818	0
gbm_tcga	TCGA-12-0819-01	TCGA-12-0819	0
gbm_tcga_pan_can_atlas_2018	TCGA-12-0819-01	TCGA-12-0819	0
gbm_tcga_pub2013	TCGA-12-0819-01	TCGA-12-0819	0
lgggbm_tcga_pub	TCGA-12-0819-01	TCGA-12-0819	0
gbm_tcga	TCGA-12-0820-01	TCGA-12-0820	0
gbm_tcga_pan_can_atlas_2018	TCGA-12-0820-01	TCGA-12-0820	0
gbm_tcga_pub2013	TCGA-12-0820-01	TCGA-12-0820	0
lgggbm_tcga_pub	TCGA-12-0820-01	TCGA-12-0820	0
gbm_tcga	TCGA-12-0821-01	TCGA-12-0821	0
gbm_tcga_pan_can_atlas_2018	TCGA-12-0821-01	TCGA-12-0821	0
gbm_tcga_pub2013	TCGA-12-0821-01	TCGA-12-0821	0
lgggbm_tcga_pub	TCGA-12-0821-01	TCGA-12-0821	0
gbm_tcga	TCGA-12-0822-01	TCGA-12-0822	0
gbm_tcga_pan_can_atlas_2018	TCGA-12-0822-01	TCGA-12-0822	0
gbm_tcga_pub2013	TCGA-12-0822-01	TCGA-12-0822	0
lgggbm_tcga_pub	TCGA-12-0822-01	TCGA-12-0822	0
gbm_tcga	TCGA-12-0826-01	TCGA-12-0826	0
gbm_tcga_pan_can_atlas_2018	TCGA-12-0826-01	TCGA-12-0826	0
gbm_tcga_pub2013	TCGA-12-0826-01	TCGA-12-0826	0
lgggbm_tcga_pub	TCGA-12-0826-01	TCGA-12-0826	0
gbm_tcga	TCGA-12-0827-01	TCGA-12-0827	0
gbm_tcga_pan_can_atlas_2018	TCGA-12-0827-01	TCGA-12-0827	0
gbm_tcga_pub2013	TCGA-12-0827-01	TCGA-12-0827	0
lgggbm_tcga_pub	TCGA-12-0827-01	TCGA-12-0827	0
gbm_tcga	TCGA-12-0828-01	TCGA-12-0828	0
gbm_tcga_pan_can_atlas_2018	TCGA-12-0828-01	TCGA-12-0828	0
gbm_tcga_pub2013	TCGA-12-0828-01	TCGA-12-0828	0
lgggbm_tcga_pub	TCGA-12-0828-01	TCGA-12-0828	0
gbm_tcga	TCGA-12-0829-01	TCGA-12-0829	0
gbm_tcga_pan_can_atlas_2018	TCGA-12-0829-01	TCGA-12-0829	0
gbm_tcga_pub2013	TCGA-12-0829-01	TCGA-12-0829	0
lgggbm_tcga_pub	TCGA-12-0829-01	TCGA-12-0829	0
gbm_tcga	TCGA-12-1088-01	TCGA-12-1088	0
gbm_tcga_pan_can_atlas_2018	TCGA-12-1088-01	TCGA-12-1088	0
gbm_tcga_pub2013	TCGA-12-1088-01	TCGA-12-1088	0
lgggbm_tcga_pub	TCGA-12-1088-01	TCGA-12-1088	0
gbm_tcga	TCGA-12-1089-01	TCGA-12-1089	0
gbm_tcga_pan_can_atlas_2018	TCGA-12-1089-01	TCGA-12-1089	0
gbm_tcga_pub2013	TCGA-12-1089-01	TCGA-12-1089	0
lgggbm_tcga_pub	TCGA-12-1089-01	TCGA-12-1089	0
gbm_tcga	TCGA-12-1090-01	TCGA-12-1090	0
gbm_tcga_pan_can_atlas_2018	TCGA-12-1090-01	TCGA-12-1090	0
gbm_tcga_pub2013	TCGA-12-1090-01	TCGA-12-1090	0
lgggbm_tcga_pub	TCGA-12-1090-01	TCGA-12-1090	0
gbm_tcga	TCGA-12-1091-01	TCGA-12-1091	0
gbm_tcga_pan_can_atlas_2018	TCGA-12-1091-01	TCGA-12-1091	0
gbm_tcga_pub2013	TCGA-12-1091-01	TCGA-12-1091	0
[truncated: 2,635 more rows]

## Sheet: Table S3-Discovery Set IHC
Tumor ID	Diagnosis	METHYLATION CLASSIFIER	METHYLATION SUBCLASS	MGMT status (for GBM, IDH wildtype)	% Tumor Cells DLL3+ (NYU)	SC16.65 anti-DLL3 antibody 0	1	2	3	% positive cells	H-score
HP-0942a/b	Pleomorphic Xanthoastrocytoma, WHO Grade 2	anaplastic pilocytic astrocytoma			0	100	0	0	0	0	0
35372A1PBQ	Grade III/IV, Anaplastic astrocytoma	control tissue hemispheric cortex				100	0	0	0	0	0
3050356D2	Normal brain adjacent to GBM	control tissue hemispheric cortex			20	90	5	5	0	10	15
39018A1PBA	Grade II/IV, oligodendroglioma	control tissue hemispheric cortex			10	90	0	10	0	10	20
9307A164B	Residual glioma in 5-10% of cells	control tissue white matter			0	100	0	0	0	0	0
HP-0909	Brain Cancer, Glioblastoma Multiforme	control tissue, inflammatory tumor microenvironment			0	100	0	0	0	0	0
4050467A8	Grade II, Glioma, Ependymoma	ependymoma posterior fossa group A			0	100	0	0	0	0	0
35585A1PBQ	Grade IV, GBM	Glioblastoma, IDH wildtype	mesenchymal	methylated	1	100	0	0	0	0	0
HP-0913	Brain Cancer, Glioblastoma Multiforme	Glioblastoma, IDH wildtype	mesenchymal	methylated	0	100	0	0	0	0	0
HP-0900	Brain Cancer, Glioblastoma Multiforme	Glioblastoma, IDH wildtype	mesenchymal	methylated	20	90	0	10	0	10	20
HP-0897	Brain Cancer, Glioblastoma Multiforme	Glioblastoma, IDH wildtype	mesenchymal	unmethylated	5	100	0	0	0	0	0
HP-0895	Brain Cancer, Glioblastoma Multiforme	Glioblastoma, IDH wildtype	mesenchymal	unmethylated	0	100	0	0	0	0	0
HP-0904	Brain Cancer, Glioblastoma Multiforme	Glioblastoma, IDH wildtype	mesenchymal	unmethylated	5	95	0	0	5	5	15
HP-0894	Brain Cancer, Glioblastoma Multiforme	Glioblastoma, IDH wildtype	not determined		5	95	0	0	5	5	15
HP-0901	Brain Cancer, Glioblastoma Multiforme	Glioblastoma, IDH wildtype	RTK I	methylated	5	100	0	0	0	0	0
HP-0898	Brain Cancer, Glioblastoma Multiforme	Glioblastoma, IDH wildtype	RTK I	methylated	60	65	5	20	10	35	75
HP-0910	Brain Cancer, Glioblastoma Multiforme	Glioblastoma, IDH wildtype	RTK I	methylated	70	40	10	20	30	60	140
HP-0906	Brain Cancer, Glioblastoma Multiforme	Glioblastoma, IDH wildtype	RTK II	methylated	5	97	0	0	3	3	9
HP-0418	Glioblastoma Multiforme	Glioblastoma, IDH wildtype	RTK II	methylated	40	90	0	10	0	10	20
HP-0899	Brain Cancer, Glioblastoma Multiforme	Glioblastoma, IDH wildtype	RTK II	methylated	30	85	0	10	5	15	35
HP-0914	Brain Cancer, Glioblastoma Multiforme	Glioblastoma, IDH wildtype	RTK II	methylated	15	80	0	10	10	20	50
35303A1PBQ	Grade IV, GBM	Glioblastoma, IDH wildtype	RTK II	methylated	50	80	0	0	20	20	60
HP-0896	Brain Cancer, Glioblastoma Multiforme	Glioblastoma, IDH wildtype	RTK II	methylated	65	60	0	20	20	40	100
HP-0905	Brain Cancer, Glioblastoma Multiforme	Glioblastoma, IDH wildtype	RTK II	unmethylated	15	97	0	0	3	3	9
HP-0919	Brain Cancer, Oligodendrogliomas	Glioma IDH mutant	1p/19q codeleted oligodendroglioma		40	80	0	10	10	20	50
38329A1PBQ	Grade II/IV, Recurrent/residual oligodendroglioma	Glioma IDH mutant	1p/19q codeleted oligodendroglioma		65	40	0	10	50	60	170
HP-0935	Oligodendroglioma, WHO Grade 2	Glioma IDH mutant	1p/19q codeleted oligodendroglioma		90	10	0	10	80	90	260
4060023A2	Grade II, Oligodendroglioma	Glioma IDH mutant	1p/19q codeleted oligodendroglioma		90	10	0	0	90	90	270
HP-0938	Oligodendroglioma, WHO Grade 2	Glioma IDH mutant	1p/19q codeleted oligodendroglioma		90	10	0	0	90	90	270
HP-0921	Brain Cancer, Oligodendrogliomas	Glioma IDH mutant	1p/19q codeleted oligodendroglioma		85	0	0	20	80	100	280
HP-0941a/b	Oligodendroglioma, IDH mutant and 1p/19q-codeleted, WHO Grade 2	Glioma IDH mutant	1p/19q codeleted oligodendroglioma		90	2	0	0	98	98	294
39413A1PBa	Grade III/IV, Anaplastic oligoastrocytoma	Glioma IDH mutant	1p/19q codeleted oligodendroglioma		90	0	0	0	100	100	300
40119A1PBF	Grade III, Anaplastic oligoastrocytoma	Glioma IDH mutant	1p/19q codeleted oligodendroglioma		90	0	0	0	100	100	300
3051595A1	Grade II, Oligodendroglioma	Glioma IDH mutant	astrocytoma		0	100	0	0	0	0	0
HP-0939a/b	Diffuse Astrocytoma, IDH mutant, WHO Grade 2	Glioma IDH mutant	astrocytoma		80	10	0	20	70	90	250
HP-0943	Diffuse Astrocytoma, IDH-mutant, WHO Grade 2	Glioma IDH mutant	astrocytoma		85	10	0	10	80	90	260
3051474C4	Grade III, Recurrent/residual anaplastic astrocytoma	Glioma IDH mutant	astrocytoma		80	10	0	10	80	90	260
HP-0944a/b	Residual/Recurrent Diffuse Astrocytoma, WHO Grade 2	Glioma IDH mutant	high grade astrocytoma		0	100	0	0	0	0	0
3051691C4	Grade III, Anaplastic oligoastrocytoma	Glioma IDH mutant	high grade astrocytoma		0	100	0	0	0	0	0
HP-0912	Brain Cancer, Glioblastoma Multiforme	Glioma IDH mutant	high grade astrocytoma		5	99	0	0	1	1	3
HP-0915	Brain Cancer, Mixed Glioma	Glioma IDH mutant	high grade astrocytoma		40	70	0	10	20	30	80
3050576C8	Grade IV, GBM, Astrocytoma	Glioma IDH mutant	high grade astrocytoma		80	60	0	30	10	40	90
4040610A3	Grade III, Anaplastic astrocytoma	Glioma IDH mutant	high grade astrocytoma		70	40	0	20	40	60	160
HP-0918	Brain Cancer, Oligodendrogliomas	low grade glioma, ganglioglioma			0	100	0	0	0	0	0
HP-0940	Ganglioglioma, WHO Grade 1	NO MATCH			80	100	0	0	0	0	0
HP-0936	Pilocytic Astrocytoma, WHO Grade 1	NO MATCH			5	100	0	0	0	0	0
34722A1PBQ	Recurrent GBM	NO MATCH			0	100	0	0	0	0	0
3050356C5	GBM - glioblastoma multiforme	NO MATCH			10	95	0	5	0	5	10
HP-0903	Brain Cancer, Glioblastoma Multiforme	NO MATCH			50	40	10	20	30	60	140
HP-0902	Brain Cancer, Glioblastoma Multiforme	Plexus Tumor	pediatric B		0	100	0	0	0	0	0
35361A1PBQ	Grade III/IV, Anaplastic astrocytoma	Plexus Tumor	plexus tumor subclass pediatric B		1	100	0	0	0	0	0
35260A1PBD	High grade recurrent/residual anaplastic oligodentroglioma	Plexus Tumor	plexus tumor subclass pediatric B		5	95	0	0	5	5	15
0105A373A	Oligodendroglioma	Plexus Tumor	plexus tumor subclass pediatric B		80	90	0	0	10	10	30
9886B	GBM	Plexus Tumor	plexus tumor subclass pediatric B		20	80	0	10	10	20	50
34894A1PBQ	Grade III/IV, Anaplastic oligoastrocytoma	Plexus Tumor	plexus tumor subclass pediatric B		70	40	10	10	40	60	150
HP-0937	Mixed Ependymoma-Subependymoma, WHO Grade 1 to 2	subependymoma, posterior fossa			0	100	0	0	0	0	0

## Sheet: Table S4-Validation Set IHC
Tumor ID	Year of surgery	IDH1/2 status	1p/19q status	Methylation class	Methylation subclass	MGMT status	% tumor cells DLL3+	Intensity (0-3)	H-score	Diagnosis	Grade	Note
V001	2001	Mutant	non-codeleted	N/A	N/A	N/A	70	2	140	Astroctytoma, grade II	2
V001R	2015	Mutant	non-codeleted	N/A	N/A	N/A	80	3	240	Astroctytoma, grade III, recurrent	3	Not initially treated
V002	2001	Mutant	non-codeleted	N/A	N/A	N/A	50	2	100	Astroctytoma, grade II	2
V002R	2010	Mutant	non-codeleted	N/A	N/A	N/A	70	3	210	Astroctytoma, grade III, recurrent	3	Not initially treated
V003	1996	Mutant	non-codeleted	N/A	N/A	N/A	50	2	100	Astroctytoma, grade II	2
V003R	2001	Mutant	non-codeleted	N/A	N/A	N/A	80	3	240	Astroctytoma, grade II, recurrent	2	Not initially treated
V004	2003	Mutant	non-codeleted	N/A	N/A	N/A	70	3	210	Astroctytoma, grade II	2
V004R	2008	Mutant	non-codeleted	N/A	N/A	N/A	60	3	180	Astroctytoma, grade II, recurrent	2	Unknown initial treatment
V005	1997	Mutant	non-codeleted	N/A	N/A	N/A	60	3	180	Astroctytoma, grade II	2
V005R	2002	Mutant	non-codeleted	N/A	N/A	N/A	50	1	50	Astroctytoma, grade II, recurrent	2	Not initially treated
V006	2005	Mutant	non-codeleted	N/A	N/A	N/A	20	1	20	Astroctytoma, grade II	2
V007	2012	Mutant	non-codeleted	N/A	N/A	N/A	40	2	80	Astroctytoma, grade II, recurrent	2	Not initially treated
V008	2003	Mutant	non-codeleted	N/A	N/A	N/A	80	3	240	Astroctytoma, grade III	3
V009	2008	Mutant	non-codeleted	N/A	N/A	N/A	80	2	160	Astroctytoma, grade II	2
V010	1994	Mutant	non-codeleted	N/A	N/A	N/A	70	3	210	Astroctytoma, grade II	2
V010R	2016	Mutant	non-codeleted	N/A	N/A	N/A	50	2	100	Astroctytoma, grade III, recurrent	3	Recurrent after RT
V011	2003	Mutant	codeleted	N/A	N/A	N/A	80	3	240	Oligodendroglioma, grade II	2
V011R	2008	Mutant	codeleted	N/A	N/A	N/A	70	3	210	Oligodendroglioma, grade III, recurrent	3	Not initially treated
V012	1995	Mutant	codeleted	N/A	N/A	N/A	60	2	120	Oligodendroglioma, grade II	2
V013	2014	Mutant	codeleted	N/A	N/A	N/A	50	2	100	Oligodendroglioma, grade II	2
V014	2010	Mutant	codeleted	N/A	N/A	N/A	60	3	180	Oligodendroglioma, grade II	2
V016	2005	Mutant	codeleted	N/A	N/A	N/A	90	3	270	Oligodendroglioma, grade II, recurrent	2	Not initially treated
V017	1999	Mutant	codeleted	N/A	N/A	N/A	60	3	180	Oligodendroglioma, grade II	2
V017R	2005	Mutant	codeleted	N/A	N/A	N/A	80	3	240	Oligodendroglioma, grade III, recurrent	3	Not initially treated
V018	2007	Mutant	unknown	N/A	N/A	N/A	30	1	30	Astrocytoma, II, NOS	2
V019	1998	Mutant	unknown	N/A	N/A	N/A	50	2	100	Diffuse astrocytoma II, NOS	2
V019R	2000	Mutant	unknown	N/A	N/A	N/A	20	2	40	Diffuse astrocytoma II, NOS, recurrent	2	Unknown initial treatment
V020	1996	Mutant	unknown	N/A	N/A	N/A	60	2	120	Diffuse astrocytoma II, NOS	2
V021	1997	Mutant	unknown	N/A	N/A	N/A	0	0	0	Anaplastic astrocytoma, grade III, NOS	3
V022	2000	Mutant	unknown	N/A	N/A	N/A	60	2	120	Anaplastic Astrocytoma, grade III, NOS	3
V022R	2004	Mutant	unknown	N/A	N/A	N/A	70	3	210	Anaplastic astrocytoma, III, NOS, recurrent	3	Not initially treated
V023	2002	Mutant	unknown	N/A	N/A	N/A	0	0	0	Diffuse astrocytoma II, NOS	2
V024	2004	Mutant	unknown	N/A	N/A	N/A	70	2	140	Anaplastic astroctyoma III, NOS, recurrent	3	Not initially treated
V025	1997	Mutant	unknown	N/A	N/A	N/A	60	3	180	Anaplastic oligodendroglioma III, NOS	3
V025R	2003	Mutant	unknown	N/A	N/A	N/A	70	3	210	Anaplastic oligodendroglioma III, NOS, recurrent	3	Unknown initial treatment
V026	1997	Mutant	unknown	N/A	N/A	N/A	70	2	140	Oligodendroglioma grade II, NOS	2
V027	2017	wildtype	N/A	Glioblastoma, IDH wildtype	RTKII	u	1	1	1	Glioblastoma	4
V028	2017	wildtype	N/A	Glioblastoma, IDH wildtype	glioblastoma IDH wildtype subclass midline	m	5	2	10	Glioblastoma	4
V029	2017	wildtype	N/A	Glioblastoma, IDH wildtype	RTKII	u	5	2	10	Gliosarcoma	4
V032	2017	wildtype	N/A	Glioblastoma, IDH wildtype	mesenchymal	u	0	0	0	Glioblastoma	4
V034	2017	wildtype	N/A	Glioblastoma, IDH wildtype	mesenchymal	u	1	1	1	Glioblastoma	4
V037	2017	wildtype	N/A	Glioblastoma, IDH wildtype	glioblastoma IDH wildtype subclass midline		10	2	20	Recurrent/Residual Glioblastoma	4
V038	2017	wildtype	N/A	Glioblastoma, IDH wildtype	RTKII	m	0	0	0	Glioblastoma	4
V039	2017	wildtype	N/A	Glioblastoma, IDH wildtype	mesenchymal	m	10	1	10	Glioblastoma	4
V040	2017	wildtype	N/A	Glioblastoma, IDH wildtype	RTKI	u	0	0	0	Glioblastoma	4
V041	2017	wildtype	N/A	Glioblastoma, IDH wildtype	RTKI	u	1	2	2	Glioblastoma	4
V042	2017	wildtype	N/A	Glioblastoma, IDH wildtype	mesenchymal	u	10	3	30	Glioblastoma	4
V043	2017	wildtype	N/A	Glioblastoma, IDH wildtype	mesenchymal	m	0	0	0	Glioblastoma	4
V044	2017	wildtype	N/A	Glioblastoma, IDH wildtype	RTKII	u	10	2	20	Glioblastoma	4
V045	2017	wildtype	N/A	Glioblastoma, IDH wildtype	RTKI	u	5	2	10	Glioblastoma	4
V046	2018	wildtype	N/A	Glioblastoma, IDH wildtype	RTKI		50	3	150	Glioblastoma	4
V048	2018	wildtype	N/A	Glioblastoma, IDH wildtype	RTKII	m	50	3	150	Glioblastoma	4
V049	2018	wildtype	N/A	Glioblastoma, IDH wildtype	RTKII	u	10	2	20	Glioblastoma	4
V051	2018	wildtype	N/A	Glioblastoma, IDH wildtype	RTKII	m	5	2	10	Glioblastoma	4
V052	2018	wildtype	N/A	Glioblastoma, IDH wildtype	RTKI	m	10	3	30	Glioblastoma	4
V054	2018	wildtype	N/A	Glioblastoma, IDH wildtype	RTKII	m	1	2	2	Glioblastoma	4
V055	2017	wildtype	N/A	Glioblastoma, IDH wildtype	RTKII	u	10	2	20	Glioblastoma	4
V056	2017	wildtype	N/A	Glioblastoma, IDH wildtype	mesenchymal	m	0	0	0	Glioblastoma	4
V057	2017	wildtype	N/A	Glioblastoma, IDH wildtype	RTKII	u	20	2	40	Glioblastoma	4
V058	2018	wildtype	N/A	N/A	N/A	u	10	3	30	Glioblastoma	4
V059	2018	wildtype	N/A	N/A	N/A	u	30	1	30	Glioblastoma	4
V060	2017	wildtype	N/A	N/A	N/A	m	0	0	0	Glioblastoma	4
